# Supplementary material
Source: MDPI journal article supplement (https://www.mdpi.com/2073-4395/13/7/1904)
Supplement: s1 [file s1]

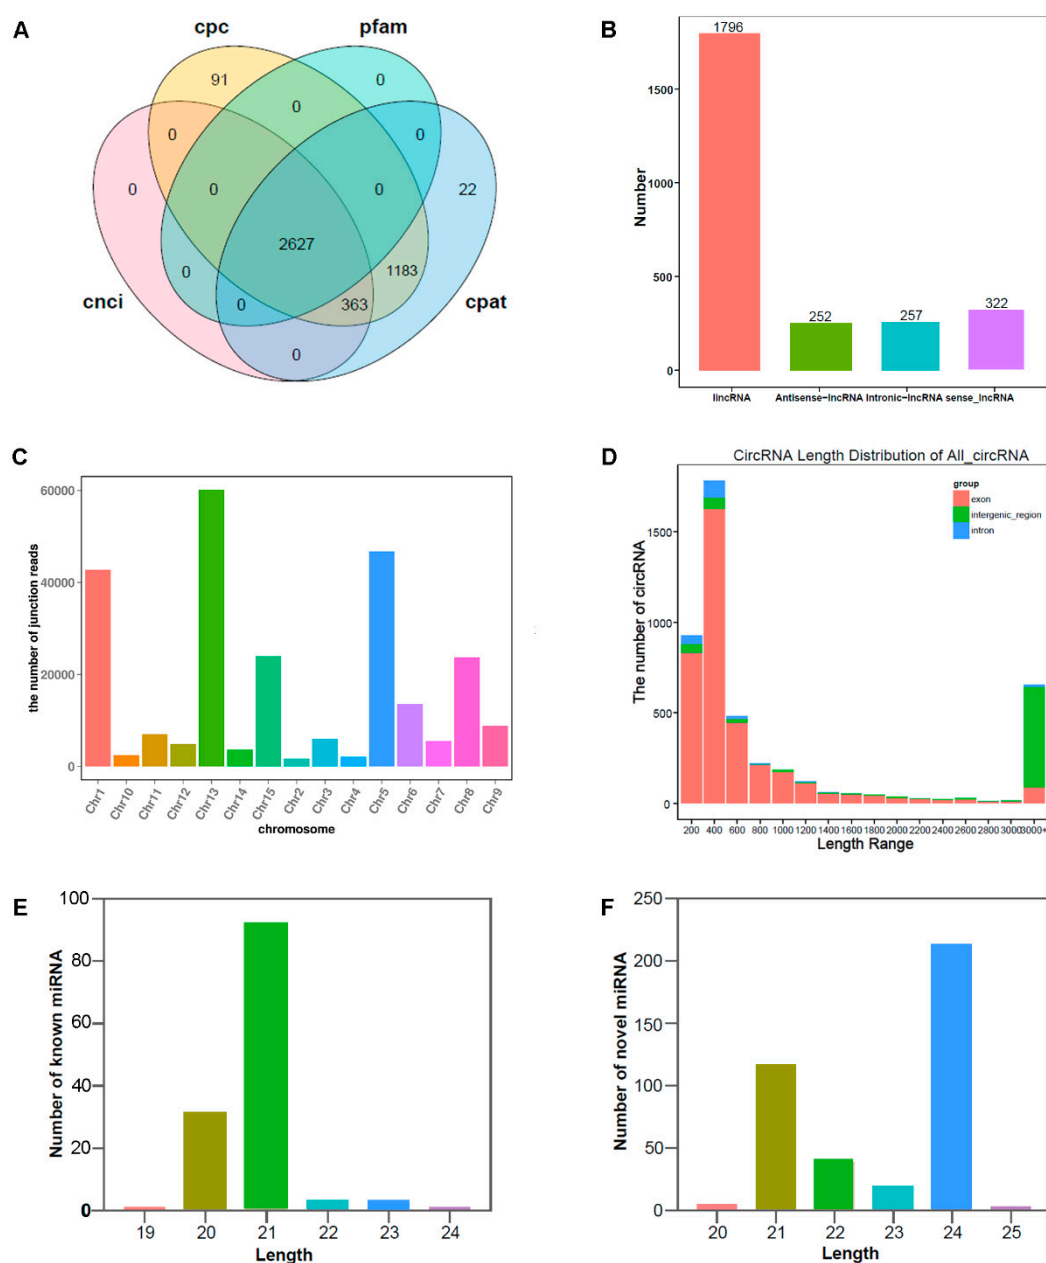

**Figure S1. The characterization of ncRNAs.** (A) Screening results of lncRNAs by cpc, cnci, pfam and cpat. (B) The classification of lncRNAs. (C) Chromosome distribution of circRNAs. (D) length distribution of circRNAs. (E) length distribution of known miRNAs. (F) length distribution of novel miRNAs.

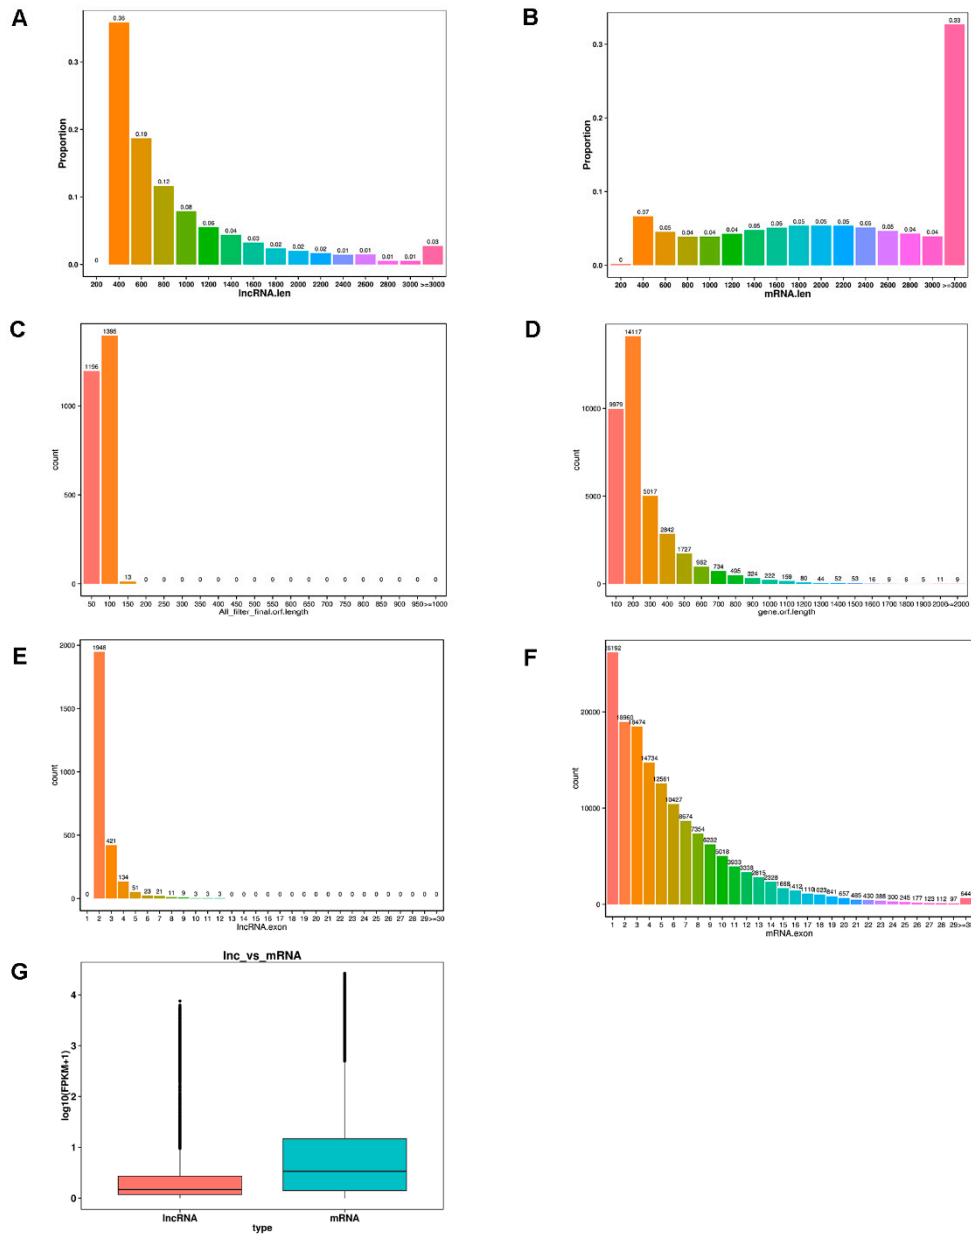

**Figure S2. Comparison of structures and expression levels between lncRNAs and mRNAs.** (A) and (B) Density distribution of transcript lengths in lncRNAs and mRNAs. (C) and (D) Density distribution of the number of ORFs in lncRNAs and mRNAs. (E) and (F) Density distribution of the number of exons in lncRNAs and mRNAs. (G) Comparison of expression levels between lncRNAs and mRNAs.
