# Supplementary material
Source: MDPI journal article supplement (https://www.mdpi.com/2073-4395/13/7/1904)
Supplement: s1 [file s1]

Archive with 4 entries (4 files):
- Supplementary Figures S1-S2.pdf
- Table S1. Primer of RT_qPCR.xlsx
- Table S2. Summary of differential expression mRNAs and ncRNAs.xlsx
- Table S3. KEGG analysis of differential expression mRNAs and ncRNAs.xlsx
