# Supplementary material
Source: MDPI journal article supplement (https://www.mdpi.com/2073-4395/13/7/1904)
Supplement: s1 [file s1 › Table S1. Primer of RT_qPCR.xlsx]

## Sheet: Sheet1
Table S1. Primers used for qRT-PCR
RNA ID	Forward (5′-3′)	Reverse (5′-3′)
LITCHI027850.m1.gene	GTCCTACATTGCTGGGCTG	CCAACTGCTGTGCCATTCAC
LITCHI008759.m1.gene	GGGCCTGTGATTGACCAGAA	GAACGGCCATGACAAACGTC
LITCHI018040.m1.gene	CAGGTCACAAGCAACTTGGC	CGATCAGGAGTGGTACGAGC
MSTRG.15825.1	ACTGAGAGAGAGAGCTGGAGG	TTGAGAGGCTATAAGGGTGGG
MSTRG.29637.2	TGTCCACCTCCCAATCAATTG	CAGAGCTCAGTTGGCAGTGTG
MSTRG.25122.5	ACCACCACTTCCTCCACCTC	ATGGGAGCAATGTTGCTGCA
Chr15:6362006|6368000	TTACAAGACCCGCTACACGG	TGTGATCCAAACACGTTGCG
Chr5:29661325|29662350	TCTTGTTGTTTGCGGCCTAC	GTGGTACACTGGAAAGGCGT
LcPR1(LITCHI001383.m1.gene)	CTGTTACCTGGGACGAGCAG	TTCTCTCCGTAAGGTCCGGT
Actin2	TATTGCCGACCGTATGAG	AGAGATGCGAGGATTGAT
