# Supplementary material
Source: MDPI journal article supplement (https://www.mdpi.com/2073-4395/13/7/1904)
Supplement: s1 [file s1 › Table S2. Summary of differential expression mRNAs and ncRNAs.xlsx]

## Sheet: DEmRNA in fruits
Summary of DEmRNAs identified in fruits
ID	FDR	log2FC	regulated
LITCHI019480.m9.gene	0.000602994	1.23523	up
LITCHI017601.m1.gene	0.000582274	-1.18434	down
LITCHI010554.m1.gene	1.17003e-08	-0.749456	down
LITCHI024601.m2.gene	0.00768543	0.842933	up
LITCHI006461.m1.gene	4.93184e-13	1.18577	up
LITCHI017696.m1.gene	2.16155e-06	-2.00172	down
LITCHI028054.m1.gene	1.36107e-05	0.835456	up
LITCHI005908.m1.gene	0.00478034	0.619822	up
LITCHI019222.m1.gene	0.000258286	-2.3616	down
LITCHI007960.m1.gene	0.0485858	-0.587232	down
LITCHI019949.m1.gene	1.84638e-06	0.870083	up
LITCHI001700.m1.gene	1.30225e-65	2.52377	up
LITCHI011149.m1.gene	2.40824e-11	-1.23239	down
LITCHI027850.m1.gene	6.97978e-26	0.895656	up
LITCHI011229.m1.gene	1.57306e-29	0.730233	up
LITCHI014925.m1.gene	2.08831e-05	0.723387	up
LITCHI018484.m1.gene	0.0360871	-0.863611	down
LITCHI020726.m1.gene	2.35699e-09	8.63804	up
LITCHI028056.m3.gene	0.00191835	-0.823726	down
LITCHI026542.m1.gene	4.38173e-09	-0.827333	down
LITCHI008330.m1.gene	1.40027e-06	-0.923129	down
LITCHI006900.m1.gene	0.00131827	-0.634582	down
LITCHI028992.m1.gene	0.00145269	0.857123	up
LITCHI020796.m1.gene	1.32941e-24	-0.887634	down
LITCHI010101.m1.gene	4.7686e-07	-0.923745	down
LITCHI010839.m1.gene	5.15897e-08	0.759264	up
LITCHI022018.m1.gene	1.96034e-05	-0.717203	down
LITCHI007836.m1.gene	1.4913e-05	0.784533	up
LITCHI003601.m1.gene	0.000879357	-0.663294	down
LITCHI028650.m1.gene	0.000110237	-0.717913	down
LITCHI013920.m8.gene	0.00216938	-1.01173	down
LITCHI029730.m1.gene	5.36932e-06	0.687749	up
LITCHI008454.m1.gene	0.0263592	-0.74582	down
LITCHI023548.m7.gene	0.0296859	-1.47658	down
LITCHI015464.m1.gene	4.20826e-06	-1.26196	down
LITCHI011204.m4.gene	0.0060882	1.02032	up
LITCHI026096.m1.gene	0.0208737	-0.7102	down
LITCHI030332.m1.gene	0.0136191	-1.88204	down
LITCHI004234.m1.gene	8.00296e-11	0.664132	up
LITCHI028974.m10.gene	9.40041e-20	-2.00539	down
Litchi_chinensis_newGene_2609	0.000348554	-0.84051	down
LITCHI008345.m1.gene	2.24444e-09	-0.968164	down
LITCHI010031.m1.gene	0.0001261	-1.30343	down
LITCHI002850.m1.gene	0.000288421	1.1031	up
LITCHI005973.m1.gene	0.041504	-0.768013	down
LITCHI011217.m1.gene	1.40741e-10	0.793525	up
LITCHI000595.m10.gene	0.017302	-1.2618	down
LITCHI023167.m1.gene	0.00627146	1.38054	up
LITCHI006810.m1.gene	0.0317973	-0.864665	down
LITCHI020189.m1.gene	4.33512e-16	0.755538	up
LITCHI029026.m1.gene	0.000159494	0.903019	up
LITCHI029433.m1.gene	0.00748844	0.807274	up
LITCHI008759.m1.gene	5.36569e-25	-0.648297	down
LITCHI019381.m1.gene	0.00178558	-0.820775	down
LITCHI009041.m1.gene	0.000247043	0.603461	up
LITCHI030207.m1.gene	3.90239e-09	-0.605975	down
LITCHI027468.m1.gene	0.0219399	1.08935	up
LITCHI003008.m1.gene	3.0383e-06	-0.585875	down
LITCHI026665.m1.gene	6.92225e-20	0.75554	up
LITCHI024624.m1.gene	0.000436041	-0.612789	down
LITCHI029623.m1.gene	0.0114049	0.607986	up
LITCHI014614.m1.gene	2.48086e-14	-1.88166	down
LITCHI004114.m1.gene	0.000613544	1.57727	up
LITCHI024778.m1.gene	3.14756e-14	-0.651866	down
LITCHI010592.m1.gene	0.0355471	-0.604918	down
LITCHI006704.m1.gene	9.24338e-20	1.00565	up
LITCHI025929.m1.gene	4.33633e-15	-1.00688	down
LITCHI007126.m1.gene	4.73479e-38	-0.650032	down
LITCHI027325.m1.gene	8.15883e-10	-0.77653	down
LITCHI027970.m1.gene	3.93304e-16	-1.3559	down
LITCHI025233.m1.gene	6.98698e-05	0.73079	up
LITCHI019955.m3.gene	0.0108101	-0.704398	down
LITCHI027987.m1.gene	0.0188897	-0.706573	down
LITCHI011691.m2.gene	0.000905688	-1.23653	down
LITCHI011843.m1.gene	0.0212912	-1.14581	down
LITCHI010355.m1.gene	8.69231e-05	-1.97189	down
LITCHI015548.m1.gene	7.5215e-33	1.18916	up
LITCHI017402.m2.gene	0.0251763	-1.59596	down
LITCHI025347.m4.gene	0.00015442	-1.96304	down
LITCHI022303.m1.gene	0.0469141	-1.30678	down
LITCHI003852.m1.gene	0.00807229	0.593034	up
LITCHI028182.m2.gene	0.000105722	-0.948309	down
LITCHI011652.m1.gene	4.90603e-07	-0.833835	down
LITCHI002714.m4.gene	0.000433907	0.933164	up
LITCHI024602.m1.gene	2.17264e-08	0.769655	up
LITCHI010261.m1.gene	0.0119916	0.640529	up
LITCHI001677.m1.gene	2.36444e-34	5.2102	up
Litchi_chinensis_newGene_8169	8.94841e-05	-0.59754	down
Litchi_chinensis_newGene_318	2.27242e-07	0.834856	up
LITCHI016794.m1.gene	0.00267911	-0.982678	down
LITCHI026635.m2.gene	1.43427e-05	0.661005	up
LITCHI016316.m1.gene	0.000200662	-1.54296	down
LITCHI028753.m8.gene	0.0345818	-0.740263	down
LITCHI016701.m1.gene	1.09755e-05	0.596113	up
LITCHI004487.m6.gene	1.79779e-09	10.9989	up
LITCHI029462.m1.gene	3.40313e-15	-0.680106	down
LITCHI025347.m3.gene	0.00152361	-1.08225	down
LITCHI025789.m1.gene	6.28268e-08	-1.3061	down
LITCHI014986.m1.gene	1.61759e-17	0.683748	up
LITCHI027320.m1.gene	6.2046e-08	-0.706474	down
LITCHI020809.m1.gene	1.14503e-05	-0.899585	down
LITCHI016148.m1.gene	2.22437e-12	1.01782	up
LITCHI018698.m1.gene	5.26341e-08	0.999708	up
LITCHI025695.m1.gene	6.82539e-06	1.03966	up
LITCHI000594.m1.gene	0.0026068	-1.29516	down
LITCHI027595.m1.gene	0.00267619	0.772884	up
LITCHI025971.m1.gene	2.60861e-08	-1.03422	down
LITCHI004892.m1.gene	0.0301453	0.789963	up
LITCHI021852.m1.gene	0.0335768	0.666379	up
LITCHI014571.m1.gene	0.00148015	-1.79862	down
LITCHI027173.m1.gene	0.00482213	1.03198	up
LITCHI019544.m1.gene	0.0462947	-0.647742	down
LITCHI000276.m1.gene	6.47396e-19	0.821704	up
LITCHI018791.m1.gene	5.66847e-65	0.668406	up
LITCHI030357.m4.gene	0.00525258	1.2459	up
LITCHI029223.m1.gene	0.00400834	-0.698552	down
LITCHI030037.m1.gene	0.00223598	-1.88818	down
LITCHI018486.m1.gene	0.0357216	-0.844719	down
LITCHI016272.m1.gene	3.33928e-15	-0.837673	down
LITCHI012811.m1.gene	0.00190796	1.7889	up
LITCHI026946.m1.gene	0.0275016	-1.19553	down
LITCHI030149.m1.gene	0.0238194	1.60135	up
LITCHI006443.m1.gene	0.0213313	-0.773209	down
LITCHI001242.m1.gene	0.00587243	1.6768	up
LITCHI013938.m1.gene	6.28364e-07	-1.09565	down
LITCHI024648.m1.gene	0.000706746	1.05877	up
LITCHI004416.m1.gene	7.54142e-05	-0.966718	down
LITCHI022827.m1.gene	3.59255e-07	-0.994652	down
LITCHI013723.m1.gene	1.23093e-17	-0.623998	down
LITCHI021096.m1.gene	0.0189968	-0.640579	down
LITCHI022830.m1.gene	0.00400593	-1.00207	down
LITCHI027123.m1.gene	3.90239e-09	-12.3138	down
LITCHI019103.m1.gene	0.00190381	-1.08423	down
LITCHI022548.m1.gene	0.000179241	-0.638931	down
LITCHI024653.m1.gene	0.0400067	-0.828044	down
LITCHI011613.m1.gene	0.00417881	-1.24737	down
LITCHI019379.m1.gene	2.62094e-45	1.30975	up
LITCHI014966.m1.gene	1.36755e-33	0.786415	up
Litchi_chinensis_newGene_5127	0.0256362	2.89807	up
LITCHI000388.m1.gene	0.000250039	-0.763134	down
LITCHI019601.m1.gene	0.00038306	0.930542	up
LITCHI029608.m1.gene	1.23629e-10	-1.918	down
LITCHI000389.m1.gene	4.63276e-05	-1.7008	down
LITCHI001614.m1.gene	1.97136e-21	-1.85411	down
LITCHI001676.m1.gene	3.36566e-10	3.79607	up
LITCHI000275.m2.gene	3.16458e-29	0.853119	up
LITCHI018517.m1.gene	0.00302959	-0.673577	down
LITCHI017318.m2.gene	0.0182751	-1.00737	down
LITCHI018305.m1.gene	3.61392e-09	-0.843212	down
LITCHI029789.m1.gene	4.4626e-06	0.670418	up
LITCHI030852.m1.gene	0.00146268	-1.19275	down
LITCHI009814.m3.gene	0.0342785	0.613588	up
LITCHI019237.m1.gene	8.39807e-09	0.607265	up
Litchi_chinensis_newGene_3424	0.000571124	-1.68892	down
LITCHI028551.m1.gene	1.72345e-12	-0.70167	down
LITCHI025634.m1.gene	0.000753791	-0.760423	down
LITCHI027381.m2.gene	2.25193e-05	-0.71927	down
LITCHI029342.m3.gene	3.66283e-07	0.881827	up
LITCHI008642.m1.gene	8.1308e-82	2.37623	up
LITCHI004248.m1.gene	0.000208986	0.68631	up
LITCHI009517.m1.gene	0.00116363	-0.74463	down
LITCHI018051.m1.gene	0.0217349	-0.783184	down
LITCHI023915.m1.gene	4.99276e-25	0.863097	up
LITCHI003665.m1.gene	0.00194148	-0.601884	down
LITCHI029015.m1.gene	0.0104658	-0.971626	down
LITCHI011031.m1.gene	0.00364839	-0.866918	down
LITCHI023913.m1.gene	1.46176e-14	0.609047	up
LITCHI020983.m1.gene	0.017327	-0.743057	down
LITCHI007999.m1.gene	3.36841e-06	0.863484	up
LITCHI003817.m1.gene	0.0486777	1.39019	up
LITCHI020256.m4.gene	0.0310913	1.02263	up
LITCHI026804.m1.gene	1.50298e-07	1.07024	up
LITCHI010829.m1.gene	3.83346e-12	-0.66218	down
Litchi_chinensis_newGene_7914	1.7456e-07	-1.21263	down
LITCHI022727.m1.gene	4.71616e-21	-1.57064	down
Litchi_chinensis_newGene_7000	0.00131827	-0.726326	down
LITCHI001703.m1.gene	1.36926e-07	1.99757	up
LITCHI028778.m1.gene	1.21637e-17	-1.54106	down
LITCHI024427.m1.gene	1.32468e-11	-1.53295	down
LITCHI001465.m1.gene	0.000163296	1.14922	up
LITCHI024657.m1.gene	1.30213e-26	3.23336	up
LITCHI020376.m1.gene	2.05626e-19	-0.868016	down
LITCHI026706.m1.gene	0.0097796	-0.739536	down
LITCHI007063.m20.gene	0.000609621	-1.26966	down
LITCHI009110.m1.gene	3.36566e-10	-0.768684	down
LITCHI017341.m1.gene	0.00228174	-0.920678	down
Litchi_chinensis_newGene_4361	0.0372144	-2.68173	down
LITCHI010868.m1.gene	4.11131e-08	1.26586	up
LITCHI027597.m1.gene	6.81334e-06	0.787696	up
LITCHI013850.m1.gene	0.00327106	0.951905	up
LITCHI017525.m1.gene	1.94412e-05	-0.631547	down
LITCHI022796.m1.gene	1.49344e-25	0.706055	up
LITCHI024785.m1.gene	1.80975e-14	-0.712777	down
LITCHI026642.m1.gene	8.83503e-05	-2.26705	down
LITCHI016581.m1.gene	0.0233705	-1.28333	down
LITCHI010181.m1.gene	2.84113e-22	1.24519	up
LITCHI024593.m1.gene	1.25201e-32	-0.75109	down
LITCHI026802.m1.gene	0.0313521	0.779466	up
LITCHI007275.m1.gene	0.0165724	1.10402	up
LITCHI008378.m1.gene	1.12774e-13	1.26305	up
LITCHI022741.m1.gene	0.00543964	-1.26681	down
LITCHI023841.m5.gene	4.71792e-08	-1.78401	down
LITCHI018405.m1.gene	1.08736e-08	-1.59675	down
LITCHI019359.m1.gene	6.05813e-08	-0.725731	down
LITCHI030774.m1.gene	0.020992	-0.598656	down
LITCHI028436.m1.gene	0.0210803	-0.607759	down
LITCHI011904.m1.gene	0.00184461	-1.07615	down
LITCHI013943.m1.gene	6.42654e-50	2.58555	up
LITCHI020650.m1.gene	3.63185e-07	-1.84287	down
LITCHI017564.m1.gene	0.0481335	-1.03323	down
LITCHI027644.m1.gene	0.0114946	-0.78026	down
LITCHI015539.m1.gene	1.76006e-22	0.588138	up
LITCHI019094.m1.gene	0.0236517	-1.21088	down
LITCHI025875.m1.gene	5.82541e-32	1.73088	up
LITCHI004656.m1.gene	0.00261212	-1.15167	down
LITCHI021038.m3.gene	0.00145314	-1.6749	down
Litchi_chinensis_newGene_1034	9.79088e-16	15.7349	up
LITCHI010462.m1.gene	2.24562e-07	-1.11009	down
LITCHI009661.m1.gene	8.35544e-10	-0.98516	down
LITCHI012915.m1.gene	0.0422273	-0.823462	down
LITCHI029466.m1.gene	2.69624e-16	-0.772189	down
LITCHI021524.m1.gene	1.50381e-05	-1.99307	down
LITCHI012404.m1.gene	6.16201e-06	-0.684364	down
LITCHI024220.m1.gene	5.56894e-14	0.943792	up
LITCHI009484.m1.gene	6.92225e-20	-1.00451	down
LITCHI022491.m1.gene	0.03441	-0.72903	down
LITCHI014272.m1.gene	9.8957e-24	0.737515	up
LITCHI011182.m1.gene	0.0212869	1.54605	up
LITCHI014878.m1.gene	1.0746e-08	0.685989	up
LITCHI012050.m1.gene	0.00113842	1.59843	up
Litchi_chinensis_newGene_6251	0.00238853	-1.12242	down
LITCHI008097.m1.gene	0.0269878	1.07438	up
LITCHI031057.m1.gene	3.42336e-30	0.844377	up
LITCHI015769.m1.gene	9.34333e-40	1.04922	up
LITCHI015376.m1.gene	0.0189064	-1.30076	down
LITCHI031167.m1.gene	1.95083e-15	2.56748	up
LITCHI024446.m1.gene	0.0197092	-1.05132	down
LITCHI004861.m1.gene	5.04862e-12	0.784549	up
LITCHI002253.m1.gene	0.0239326	-1.53863	down
LITCHI006456.m1.gene	0.00157402	1.79424	up
LITCHI027893.m1.gene	0.021245	1.58187	up
LITCHI009695.m1.gene	4.83676e-07	-0.683156	down
LITCHI010415.m1.gene	0.000879357	-0.806737	down
LITCHI011284.m1.gene	3.66024e-67	-1.36818	down
LITCHI020472.m1.gene	0.00554274	0.974425	up
LITCHI013849.m1.gene	0.0207728	0.71485	up
LITCHI008338.m1.gene	0.0236627	0.665565	up
LITCHI012369.m4.gene	0.00900325	0.730364	up
LITCHI027573.m1.gene	0.032194	0.678015	up
LITCHI004661.m1.gene	1.43004e-13	-1.0068	down
LITCHI025392.m1.gene	3.20829e-08	0.661123	up
LITCHI022002.m1.gene	8.87786e-10	0.591343	up
LITCHI028577.m1.gene	0.00887542	1.25155	up
LITCHI008179.m1.gene	0.0176341	-0.737954	down
LITCHI025582.m1.gene	7.49404e-07	0.929906	up
LITCHI028721.m1.gene	4.96056e-05	-0.725391	down
LITCHI001618.m1.gene	0.00751064	-0.950636	down
LITCHI013386.m1.gene	1.95591e-05	-0.620901	down
LITCHI027694.m1.gene	0.00127577	1.60912	up
LITCHI018448.m1.gene	0.000104813	-0.824688	down
LITCHI014508.m1.gene	0.00011508	0.669775	up
LITCHI007312.m1.gene	2.46927e-05	-0.852673	down
LITCHI029803.m1.gene	1.30888e-09	-0.695541	down
LITCHI004599.m1.gene	1.87865e-17	2.64846	up
LITCHI002778.m1.gene	0.00482592	0.750628	up
LITCHI006780.m1.gene	8.53453e-09	-1.04934	down
LITCHI026128.m1.gene	3.87216e-36	-1.43946	down
LITCHI017602.m1.gene	0.00143596	-0.602751	down
LITCHI013948.m1.gene	0.0115818	-0.745936	down
LITCHI026131.m1.gene	1.0135e-08	-0.623967	down
LITCHI000277.m10.gene	0.000238525	1.5991	up
Litchi_chinensis_newGene_249	0.0307655	-0.978752	down
LITCHI027603.m1.gene	8.19787e-10	-0.700856	down
LITCHI013343.m1.gene	5.09563e-07	-0.880431	down
LITCHI021990.m1.gene	1.80894e-05	-0.679733	down
LITCHI012883.m1.gene	1.09702e-07	0.829046	up
LITCHI014759.m2.gene	1.06374e-21	0.982299	up
LITCHI009407.m1.gene	0.0377895	-0.777618	down
LITCHI024864.m1.gene	0.00922357	0.771878	up
LITCHI001668.m1.gene	8.75505e-06	-3.37975	down
LITCHI031339.m1.gene	0.0405055	-1.38654	down
LITCHI005414.m1.gene	0.00489104	-0.634351	down
LITCHI014918.m1.gene	4.43603e-13	-0.891519	down
LITCHI024918.m1.gene	2.38493e-15	0.841594	up
LITCHI010130.m1.gene	0.0124703	-0.740903	down
LITCHI025819.m1.gene	0.00350982	-0.723087	down
LITCHI028810.m1.gene	4.24989e-16	-10.6136	down
LITCHI018192.m1.gene	0.00415368	-0.966128	down
LITCHI030542.m1.gene	0.0467975	-0.973304	down
Litchi_chinensis_newGene_8668	0.00617335	-1.77681	down
LITCHI005586.m1.gene	0.00443543	-0.958379	down
Litchi_chinensis_newGene_1321	2.55171e-16	-10.7246	down
LITCHI018518.m1.gene	1.95549e-51	1.04477	up
LITCHI022839.m1.gene	1.4551e-05	-0.891647	down
LITCHI009680.m1.gene	2.79319e-11	-0.715979	down
LITCHI027649.m1.gene	7.14779e-08	1.2267	up
LITCHI009353.m1.gene	0.000527418	0.947739	up
LITCHI017116.m1.gene	0.000863511	-0.844813	down
LITCHI018472.m1.gene	0.0170098	-0.935996	down
LITCHI026395.m3.gene	1.79456e-06	0.705072	up
LITCHI013549.m1.gene	0.00182772	1.3721	up
LITCHI001479.m1.gene	0.00700738	-1.86033	down
LITCHI008825.m1.gene	3.33458e-08	1.13609	up
LITCHI021972.m1.gene	0.00826831	-0.715477	down
LITCHI025976.m1.gene	6.67696e-08	-0.992141	down
LITCHI005186.m1.gene	8.77401e-10	0.693683	up
LITCHI018720.m1.gene	1.51801e-07	0.664222	up
LITCHI024649.m1.gene	1.19693e-29	2.47644	up
LITCHI016851.m1.gene	5.74296e-10	-0.899562	down
LITCHI019242.m1.gene	0.00100297	1.2985	up
LITCHI029917.m1.gene	9.12323e-33	-0.709182	down
LITCHI026989.m1.gene	2.94924e-12	-0.696876	down
LITCHI014780.m1.gene	0.0377921	0.976863	up
LITCHI011700.m1.gene	0.000794287	0.949242	up
LITCHI027193.m1.gene	0.000310425	-1.00409	down
LITCHI012125.m1.gene	5.56062e-05	1.32922	up
LITCHI027733.m1.gene	0.0188585	0.793036	up
LITCHI025005.m1.gene	0.00486526	-1.79602	down
LITCHI017393.m1.gene	0.00159792	-1.2969	down
LITCHI010742.m1.gene	0.00230705	-1.27121	down
LITCHI004857.m1.gene	9.71495e-10	0.906756	up
LITCHI005365.m1.gene	1.55162e-08	0.65701	up
LITCHI001825.m1.gene	0.0265793	1.32572	up
LITCHI015584.m1.gene	6.14739e-08	-0.784349	down
LITCHI019261.m1.gene	3.99416e-06	-1.5233	down
LITCHI013339.m1.gene	6.23305e-05	-0.780623	down
LITCHI013343.m5.gene	0.0356149	-1.62332	down
LITCHI010532.m1.gene	0.00917284	-1.16118	down
LITCHI026493.m1.gene	6.72912e-09	0.728618	up
LITCHI007063.m10.gene	0.0381508	-0.905146	down
LITCHI020454.m1.gene	0.0201189	-0.590006	down
LITCHI001436.m1.gene	2.94883e-39	0.817344	up
LITCHI019621.m1.gene	0.0373591	-1.19662	down
LITCHI021549.m1.gene	2.56983e-18	0.966116	up
LITCHI016624.m3.gene	0.0144975	-0.725271	down
LITCHI001554.m1.gene	3.17237e-06	1.49343	up
LITCHI019603.m1.gene	0.00034705	0.690451	up
LITCHI011030.m1.gene	0.00188927	-0.98093	down
LITCHI027851.m2.gene	0.00231905	0.754701	up
LITCHI011004.m2.gene	0.00976608	-0.671791	down
LITCHI002377.m2.gene	6.15611e-10	-9.11932	down
LITCHI029620.m1.gene	1.2045e-39	0.815123	up
LITCHI025891.m1.gene	2.37315e-12	1.34482	up
LITCHI001749.m1.gene	0.000670017	1.04875	up
LITCHI005723.m1.gene	2.16652e-07	-1.16323	down
LITCHI020836.m2.gene	0.00796728	1.05758	up
LITCHI003411.m5.gene	4.31747e-05	-0.922865	down
LITCHI017676.m2.gene	5.88677e-20	0.660132	up
LITCHI020712.m1.gene	0.00080628	-0.590409	down
LITCHI026328.m1.gene	2.86503e-38	0.612165	up
LITCHI017494.m1.gene	2.64467e-14	-0.623694	down
LITCHI004169.m1.gene	0.0477188	-1.19567	down
LITCHI022948.m1.gene	0.0300834	-1.17538	down
LITCHI010417.m1.gene	0.0112106	-0.587363	down
LITCHI001495.m1.gene	1.75202e-17	-0.951568	down
LITCHI000476.m1.gene	1.17521e-08	1.1697	up
LITCHI025887.m1.gene	1.11725e-05	1.251	up
LITCHI017424.m1.gene	1.17936e-13	-0.857406	down
LITCHI030969.m2.gene	0.00922532	1.03573	up
LITCHI011281.m1.gene	0.000280153	0.681154	up
LITCHI011490.m1.gene	3.4756e-06	-0.861704	down
LITCHI026906.m1.gene	2.03782e-17	-0.679486	down
LITCHI015133.m1.gene	9.76588e-28	1.14069	up
LITCHI029702.m1.gene	0.0449655	0.819163	up
LITCHI016336.m1.gene	3.50701e-19	1.16323	up
LITCHI002040.m1.gene	6.72459e-69	-1.05865	down
LITCHI018348.m1.gene	2.27544e-13	0.592991	up
LITCHI014459.m1.gene	0.0065669	-1.43245	down
LITCHI002246.m1.gene	0.0242362	0.76126	up
LITCHI008638.m1.gene	0.00103582	-0.612427	down
LITCHI023390.m5.gene	0.0387708	0.93579	up
LITCHI023435.m1.gene	1.76472e-06	-0.859958	down
LITCHI010636.m1.gene	1.20564e-46	-0.858221	down
LITCHI019276.m2.gene	2.46049e-06	-2.33711	down
LITCHI017735.m1.gene	0.00853316	-0.945203	down
LITCHI022678.m1.gene	0.00440739	-1.10998	down
LITCHI027582.m10.gene	1.92043e-06	1.93562	up
LITCHI001288.m10.gene	0.0375951	-0.6279	down
LITCHI029704.m1.gene	1.13197e-14	3.21401	up
LITCHI011394.m1.gene	3.34197e-13	0.602528	up
LITCHI008890.m1.gene	0.000126385	-1.15104	down
LITCHI006116.m1.gene	0.0176571	0.670625	up
LITCHI023043.m4.gene	6.33988e-05	0.639692	up
LITCHI008324.m1.gene	0.0017253	-1.47972	down
LITCHI008958.m1.gene	0.0416742	-0.735431	down
LITCHI009382.m2.gene	1.17971e-09	-1.26034	down
LITCHI026761.m1.gene	0.000272441	-0.593591	down
LITCHI020470.m1.gene	0.000579025	-0.754718	down
LITCHI003710.m1.gene	0.00296304	-0.755544	down
LITCHI004917.m1.gene	0.00263283	0.591119	up
LITCHI012030.m1.gene	0.0257785	-1.45887	down
LITCHI028954.m1.gene	0.000135984	0.632044	up
LITCHI019346.m7.gene	0.00062557	-1.64296	down
LITCHI015008.m1.gene	0.000369073	2.41525	up
LITCHI026491.m1.gene	1.43077e-29	0.695908	up
LITCHI018796.m1.gene	0.00882287	-1.99542	down
LITCHI016388.m1.gene	0.0366224	-1.6782	down
LITCHI030333.m1.gene	0.00222939	-1.50816	down
Litchi_chinensis_newGene_2717	0.0313186	0.93847	up
LITCHI015408.m1.gene	0.0390111	-0.942065	down
LITCHI027513.m1.gene	0.00062557	-0.980997	down
LITCHI010256.m1.gene	0.000136192	-0.622193	down
LITCHI007240.m1.gene	9.04576e-32	-0.73573	down
LITCHI018121.m1.gene	7.92894e-14	-0.793991	down
LITCHI026373.m1.gene	0.00953436	-0.917521	down
LITCHI008573.m1.gene	0.00885095	1.49896	up
LITCHI010548.m1.gene	2.32957e-21	0.659561	up
LITCHI020771.m1.gene	3.49939e-07	1.00088	up
LITCHI004814.m3.gene	2.01886e-10	-0.70012	down
LITCHI017027.m1.gene	0.00225905	-0.81544	down
LITCHI029245.m1.gene	0.0208737	1.51802	up
LITCHI021455.m1.gene	0.0496807	1.21641	up
LITCHI006445.m1.gene	0.0410035	-1.03097	down
LITCHI018358.m1.gene	0.00121937	-1.13148	down
LITCHI009348.m1.gene	2.73219e-75	1.26493	up
LITCHI004507.m1.gene	0.00300338	-0.681542	down
LITCHI029356.m1.gene	0.000974772	0.697783	up
LITCHI024783.m1.gene	7.74439e-06	-1.25212	down
LITCHI002051.m1.gene	4.99898e-08	0.822641	up
LITCHI014449.m1.gene	0.044144	-1.6885	down
LITCHI029990.m1.gene	4.97678e-20	-0.710857	down
Litchi_chinensis_newGene_1124	0.000347878	-0.601862	down
LITCHI004977.m1.gene	1.49404e-23	-0.755664	down
LITCHI028558.m1.gene	5.93953e-11	0.874934	up
Litchi_chinensis_newGene_1942	0.00205298	0.715693	up
LITCHI020527.m2.gene	2.87484e-35	0.824577	up
LITCHI021833.m1.gene	3.3884e-11	-3.58288	down
LITCHI014139.m1.gene	4.60961e-05	2.49736	up
LITCHI006807.m1.gene	0.00113837	-1.71824	down
LITCHI014615.m1.gene	9.82481e-07	-0.858429	down
LITCHI027204.m1.gene	0.00132862	1.31966	up
LITCHI002853.m1.gene	0.00104168	0.692673	up
LITCHI021362.m1.gene	0.00856433	-0.696392	down
LITCHI014361.m1.gene	0.000524732	0.684933	up
LITCHI025238.m1.gene	0.000161699	0.813454	up
LITCHI017644.m1.gene	5.8878e-05	4.27178	up
LITCHI026662.m5.gene	0.00921745	0.809584	up
LITCHI020736.m2.gene	1.58881e-45	3.93154	up
LITCHI018060.m1.gene	4.46113e-12	1.45726	up
LITCHI027709.m6.gene	0.000797968	-2.26874	down
LITCHI020345.m8.gene	0.0222977	-1.15577	down
LITCHI004173.m1.gene	0.00119094	-0.890235	down
LITCHI008621.m1.gene	5.48222e-05	-1.09274	down
LITCHI016862.m1.gene	0.021216	-0.766487	down
LITCHI019960.m3.gene	0.0025944	-0.650608	down
LITCHI019561.m1.gene	2.07046e-37	-2.57383	down
LITCHI006319.m1.gene	0.000115222	-0.83881	down
LITCHI023969.m1.gene	4.4539e-22	3.48728	up
LITCHI020029.m1.gene	1.6646e-08	0.620907	up
LITCHI011102.m10.gene	0.000821134	0.594101	up
LITCHI005554.m1.gene	0.00389533	-0.96798	down
LITCHI028925.m1.gene	3.36038e-06	-0.699513	down
LITCHI022113.m1.gene	4.91376e-06	1.52749	up
LITCHI003404.m1.gene	0.00608603	-0.672472	down
LITCHI018672.m1.gene	1.18878e-09	-1.43984	down
LITCHI002457.m1.gene	0.000300585	1.15276	up
LITCHI002298.m1.gene	3.24306e-06	0.769528	up
LITCHI020890.m1.gene	0.00174214	-0.769677	down
LITCHI010614.m1.gene	7.54142e-05	-0.694056	down
LITCHI022748.m1.gene	0.00669381	-1.00972	down
LITCHI006477.m1.gene	0.00096601	0.978996	up
LITCHI011378.m1.gene	4.13467e-35	0.687089	up
LITCHI023727.m3.gene	0.00102568	-1.17323	down
LITCHI001438.m2.gene	0.0161272	1.17229	up
LITCHI006763.m1.gene	2.0598e-15	1.16782	up
LITCHI007728.m1.gene	1.20383e-08	1.58931	up
LITCHI004270.m1.gene	5.92124e-15	1.40695	up
LITCHI022508.m1.gene	1.03059e-05	1.50529	up
LITCHI016707.m1.gene	0.000319062	-0.766472	down
LITCHI023381.m1.gene	8.3666e-08	0.95285	up
LITCHI015371.m1.gene	5.89675e-71	0.908662	up
LITCHI018577.m1.gene	7.71383e-18	0.965207	up
LITCHI020852.m1.gene	0.000721777	1.27681	up
LITCHI001804.m3.gene	4.65739e-17	-2.0404	down
LITCHI003778.m1.gene	3.75616e-12	-1.17621	down
LITCHI010719.m5.gene	0.000225073	0.621417	up
LITCHI027643.m1.gene	0.019613	-0.625953	down
LITCHI027044.m2.gene	0.00960798	-0.868654	down
LITCHI031799.m2.gene	0.0324111	1.48381	up
LITCHI023108.m1.gene	0.000483898	-1.12386	down
LITCHI031128.m1.gene	0.00958512	-0.819262	down
LITCHI029915.m4.gene	0.00235867	1.76308	up
LITCHI019504.m1.gene	5.54098e-12	0.679457	up
LITCHI001885.m1.gene	5.91043e-15	0.588406	up
LITCHI016559.m1.gene	4.20171e-05	0.723496	up
LITCHI011335.m1.gene	7.36406e-12	0.726622	up
LITCHI006354.m1.gene	5.67951e-13	0.637151	up
LITCHI021948.m1.gene	7.54254e-08	-1.75184	down
LITCHI024894.m1.gene	0.000259007	-0.766083	down
LITCHI013622.m1.gene	3.00438e-11	0.971435	up
LITCHI005804.m1.gene	9.24338e-20	-0.825244	down
LITCHI008367.m3.gene	5.13859e-18	0.824132	up
LITCHI004834.m5.gene	0.0392327	0.87006	up
LITCHI002687.m1.gene	0.00538229	1.22138	up
LITCHI022586.m1.gene	0.0322894	-1.34991	down
LITCHI023192.m2.gene	4.54096e-17	10.8072	up
LITCHI010216.m1.gene	8.67514e-05	-0.732854	down
LITCHI022951.m1.gene	1.27559e-13	-1.32046	down
LITCHI027551.m1.gene	0.000280429	2.6553	up
LITCHI006840.m1.gene	0.00051518	-0.906584	down
LITCHI016758.m1.gene	0.00818373	-0.686456	down
LITCHI014450.m1.gene	0.000168154	-2.20672	down
LITCHI004227.m1.gene	0.0434034	0.929229	up
LITCHI020836.m1.gene	0.0354127	-1.07918	down
LITCHI029547.m1.gene	3.83346e-12	1.49456	up
LITCHI013093.m1.gene	1.61662e-27	0.707031	up
LITCHI019539.m1.gene	0.000527528	-2.42686	down
LITCHI029461.m1.gene	0.00386968	-0.597593	down
LITCHI021084.m1.gene	0.00486595	0.616155	up
LITCHI005219.m1.gene	0.03885	1.21424	up
LITCHI029034.m1.gene	0.00993907	0.940303	up
LITCHI003545.m5.gene	0.0478399	1.6746	up
LITCHI016096.m1.gene	0.0458703	0.711803	up
LITCHI029210.m1.gene	0.000821134	-0.716855	down
LITCHI016986.m2.gene	6.07345e-05	-0.997491	down
LITCHI030969.m1.gene	0.0171637	-1.02665	down
LITCHI027316.m1.gene	0.0170452	0.71638	up
LITCHI027417.m1.gene	4.05286e-05	-0.697071	down
LITCHI014425.m1.gene	0.0211147	0.72193	up
LITCHI027044.m1.gene	1.59718e-09	-0.805402	down
LITCHI015108.m1.gene	1.24295e-25	1.11244	up
LITCHI005473.m1.gene	6.90165e-14	0.97461	up
LITCHI022812.m1.gene	0.0117192	1.17432	up
LITCHI023081.m3.gene	7.64928e-09	1.68757	up
LITCHI004745.m1.gene	1.90849e-46	0.845882	up
LITCHI015333.m1.gene	0.0356032	0.747615	up
LITCHI013321.m1.gene	0.00541785	-0.94647	down
LITCHI010549.m1.gene	2.06627e-17	-0.787751	down
LITCHI018320.m1.gene	0.00266665	-0.682731	down
LITCHI009576.m1.gene	3.7893e-18	0.673991	up
LITCHI026178.m1.gene	1.77814e-31	1.02884	up
LITCHI020597.m2.gene	0.00244146	-1.08401	down
LITCHI020095.m1.gene	0.00423818	0.679882	up
LITCHI011388.m1.gene	0.0282155	0.739808	up
LITCHI024396.m1.gene	0.0248223	-0.674872	down
LITCHI004353.m1.gene	7.53938e-18	0.798936	up
LITCHI001081.m1.gene	0.00156449	-0.743761	down
LITCHI018713.m1.gene	1.19904e-11	0.854079	up
LITCHI022746.m1.gene	1.68253e-13	-0.740111	down
LITCHI013117.m1.gene	8.50766e-05	1.25373	up
LITCHI013431.m1.gene	0.0195589	0.904912	up
LITCHI011305.m6.gene	0.00235181	-1.80642	down
LITCHI004939.m3.gene	3.44731e-08	-8.28065	down
LITCHI006951.m1.gene	3.11116e-06	1.09466	up
LITCHI020664.m1.gene	7.63482e-37	1.15073	up
LITCHI024374.m1.gene	0.00050111	-1.06312	down
LITCHI012687.m2.gene	0.0417041	-3.52672	down
LITCHI029705.m1.gene	0.00031819	1.33977	up
LITCHI015624.m1.gene	3.01298e-07	0.843994	up
LITCHI031037.m1.gene	1.28602e-17	-0.749687	down
LITCHI004576.m10.gene	4.31852e-14	-1.74364	down
LITCHI024825.m1.gene	0.0394502	-1.03549	down
LITCHI014625.m1.gene	1.17739e-12	0.77778	up
LITCHI026767.m1.gene	0.0108965	1.26738	up
LITCHI005979.m1.gene	0.0112106	1.0751	up
LITCHI030703.m2.gene	3.26809e-07	-1.63236	down
LITCHI000894.m1.gene	0.0189064	1.56502	up
LITCHI029890.m1.gene	1.191e-34	0.7605	up
LITCHI011382.m1.gene	1.83044e-34	0.814734	up
LITCHI030175.m1.gene	2.87903e-06	0.627909	up
LITCHI006615.m1.gene	1.17787e-27	-0.615365	down
LITCHI005983.m1.gene	4.4631e-08	-0.768588	down
Litchi_chinensis_newGene_7187	0.00301056	1.24506	up
LITCHI005797.m1.gene	1.95889e-15	-0.763096	down
Litchi_chinensis_newGene_227	0.00151257	1.02634	up
LITCHI003604.m1.gene	0.0345052	-0.899249	down
LITCHI023080.m1.gene	2.64356e-13	-0.830528	down
LITCHI014839.m1.gene	0.00301056	2.06053	up
LITCHI012664.m1.gene	0.000879357	-1.31919	down
LITCHI001567.m1.gene	1.05322e-10	2.53685	up
LITCHI010469.m1.gene	1.56647e-15	10.9435	up
LITCHI003118.m1.gene	0.0121063	0.622604	up
LITCHI018208.m1.gene	9.52627e-68	2.73884	up
LITCHI026643.m1.gene	0.00636716	-1.88712	down
LITCHI024319.m1.gene	0.00393486	-1.46454	down
LITCHI018696.m1.gene	5.51604e-21	1.03389	up
LITCHI022600.m1.gene	0.00468476	-0.887549	down
LITCHI012069.m1.gene	1.17934e-16	-0.69949	down
LITCHI010639.m1.gene	0.0332906	-1.40729	down
LITCHI019007.m1.gene	1.3376e-07	0.59532	up
LITCHI002109.m1.gene	5.86463e-08	-1.02256	down
LITCHI018055.m1.gene	0.0467827	0.618553	up
LITCHI016803.m1.gene	0.0110092	-0.837519	down
LITCHI021854.m1.gene	0.039876	0.690061	up
LITCHI022989.m1.gene	0.00675254	-0.659893	down
LITCHI001699.m1.gene	3.95483e-10	0.724268	up
LITCHI019429.m1.gene	1.65869e-08	-1.40201	down
LITCHI004930.m1.gene	5.17614e-05	-1.64285	down
LITCHI015726.m3.gene	0.0255232	1.07302	up
LITCHI030220.m1.gene	3.28622e-10	-0.658641	down
LITCHI006457.m1.gene	2.69043e-09	1.34537	up
LITCHI012808.m1.gene	4.40303e-06	0.798862	up
LITCHI018256.m1.gene	3.1719e-06	1.50149	up
LITCHI005581.m4.gene	6.52381e-05	-0.814187	down
LITCHI010908.m1.gene	0.0241617	0.883165	up
LITCHI020761.m1.gene	3.50448e-06	1.17435	up
LITCHI027125.m6.gene	3.47038e-23	0.949613	up
LITCHI026284.m1.gene	0.000854693	-0.769801	down
LITCHI027304.m1.gene	7.08988e-05	-0.599307	down
LITCHI027873.m2.gene	7.72418e-19	-0.896871	down
LITCHI030969.m5.gene	0.0281248	-0.752319	down
LITCHI004576.m1.gene	2.38317e-13	-1.94875	down
LITCHI028975.m1.gene	1.32622e-10	-1.02052	down
LITCHI005034.m1.gene	1.95067e-08	-8.343	down
LITCHI018502.m1.gene	0.000240712	0.996444	up
LITCHI004132.m1.gene	4.17076e-18	1.10621	up
LITCHI005523.m1.gene	9.08694e-06	1.28791	up
LITCHI003045.m1.gene	0.0049976	-1.12425	down
LITCHI027852.m1.gene	2.07842e-07	2.39937	up
LITCHI005357.m1.gene	4.19743e-06	1.68161	up
LITCHI006437.m1.gene	2.28015e-06	0.9388	up
LITCHI006963.m1.gene	6.18499e-19	0.896087	up
LITCHI011139.m1.gene	0.03295	0.993873	up
LITCHI005362.m1.gene	5.6808e-06	-0.678968	down
LITCHI031092.m1.gene	0.00310977	-0.748278	down
LITCHI024538.m1.gene	0.00596575	1.67792	up
LITCHI012839.m1.gene	1.66432e-88	1.49329	up
LITCHI022755.m1.gene	9.92499e-09	-0.748464	down
Litchi_chinensis_newGene_803	0.00758029	-0.905921	down
LITCHI016594.m1.gene	0.00325755	-0.790465	down
LITCHI026700.m1.gene	0.044217	-0.604295	down
LITCHI010387.m9.gene	7.1604e-05	-2.19226	down
LITCHI021839.m1.gene	1.23727e-52	1.27299	up
LITCHI008885.m1.gene	0.0175677	-0.869542	down
LITCHI009273.m1.gene	3.17688e-08	-1.43162	down
LITCHI009873.m1.gene	0.000961863	2.43897	up
LITCHI027835.m1.gene	7.48036e-09	-0.812995	down
LITCHI011162.m1.gene	0.0103635	-0.692584	down
LITCHI027582.m1.gene	2.21311e-08	-1.66596	down
Litchi_chinensis_newGene_5916	0.0248028	-1.42764	down
LITCHI009820.m1.gene	0.00186626	-0.751049	down
LITCHI007818.m1.gene	0.0141407	0.604019	up
LITCHI020358.m1.gene	2.07956e-05	0.913082	up
LITCHI003871.m1.gene	0.039571	0.72545	up
LITCHI020296.m1.gene	0.00322763	2.69183	up
LITCHI004718.m1.gene	0.000952669	-0.964996	down
LITCHI015971.m1.gene	0.036199	-0.920121	down
LITCHI021280.m1.gene	0.00683978	2.19184	up
LITCHI009511.m1.gene	0.0295189	-1.09755	down
LITCHI010833.m2.gene	3.25634e-10	-1.1266	down
LITCHI011363.m1.gene	0.0300926	-0.95567	down
LITCHI008740.m6.gene	0.0173204	-1.15232	down
LITCHI022703.m1.gene	1.7799e-79	1.30635	up
LITCHI011894.m6.gene	0.0162341	-0.9203	down
LITCHI003772.m1.gene	0.0416742	-0.719398	down
LITCHI007242.m3.gene	0.0128216	-0.657632	down
LITCHI024182.m3.gene	1.0852e-33	1.35617	up
LITCHI012046.m1.gene	2.40629e-06	-2.30637	down
LITCHI016359.m1.gene	6.14036e-14	0.703559	up
LITCHI026115.m1.gene	4.38665e-06	-1.50267	down
LITCHI022777.m1.gene	0.00256627	-1.06411	down
LITCHI025352.m1.gene	3.39076e-07	1.0278	up
LITCHI021578.m1.gene	7.65856e-69	1.89287	up
LITCHI019224.m3.gene	0.00324057	-1.42106	down
LITCHI001952.m1.gene	0.000885585	-1.31903	down
LITCHI008559.m1.gene	2.11658e-25	0.779896	up
LITCHI009059.m2.gene	6.87532e-24	-1.92001	down
LITCHI026874.m1.gene	0.000142782	-0.972327	down
LITCHI027324.m1.gene	0.000195851	-0.785776	down
LITCHI024821.m1.gene	4.7378e-52	-0.809687	down
LITCHI009646.m1.gene	3.19771e-07	1.29416	up
LITCHI004588.m1.gene	0.0150699	-0.633362	down
LITCHI011747.m1.gene	0.038451	-1.27228	down
Litchi_chinensis_newGene_4936	9.27238e-17	10.9468	up
LITCHI023912.m1.gene	8.57559e-10	-1.0252	down
LITCHI016595.m1.gene	7.79392e-05	0.65124	up
LITCHI024071.m1.gene	0.00683759	0.85538	up
LITCHI001702.m1.gene	0.014834	1.5958	up
LITCHI017063.m1.gene	0.000835157	1.15129	up
LITCHI020265.m1.gene	0.000995825	-0.749812	down
LITCHI018980.m1.gene	1.68646e-26	-0.775686	down
LITCHI019026.m6.gene	0.0378926	-0.964857	down
LITCHI027022.m1.gene	0.00260644	-0.789392	down
LITCHI021841.m1.gene	1.45612e-63	1.24452	up
LITCHI017551.m2.gene	0.000259472	-1.3763	down
LITCHI030761.m1.gene	1.3352e-23	0.753372	up
LITCHI018244.m1.gene	0.00055448	2.02996	up
LITCHI009454.m1.gene	2.52362e-09	-1.35823	down
LITCHI025402.m7.gene	0.0387214	-0.84714	down
LITCHI003656.m1.gene	1.10612e-06	0.812389	up
LITCHI020620.m1.gene	1.13482e-06	-0.678651	down
LITCHI017565.m1.gene	0.0211693	-1.02335	down
LITCHI014991.m1.gene	2.05857e-15	0.608242	up
LITCHI014613.m1.gene	1.21966e-15	-0.676707	down
LITCHI020566.m1.gene	6.36429e-17	1.36328	up
LITCHI002149.m1.gene	0.00256791	0.965923	up
LITCHI016493.m1.gene	4.10078e-55	1.48255	up
LITCHI004951.m1.gene	0.000749006	1.2467	up
LITCHI013263.m1.gene	0.000563259	2.08133	up
LITCHI030869.m1.gene	0.0168339	0.640775	up
LITCHI017852.m1.gene	7.23233e-11	-1.12423	down
LITCHI014829.m1.gene	0.0127797	-0.959263	down
LITCHI022269.m1.gene	3.89531e-10	1.51236	up
LITCHI018927.m1.gene	2.24035e-10	1.96127	up
LITCHI011690.m1.gene	3.36832e-19	-0.794417	down
LITCHI015458.m1.gene	0.0474364	-0.605493	down
LITCHI001506.m1.gene	0.0382448	-1.41034	down
LITCHI016580.m1.gene	0.0135171	1.5829	up
LITCHI025955.m1.gene	9.71249e-20	-0.767074	down
LITCHI011010.m1.gene	0.0267274	-0.832513	down
LITCHI014858.m1.gene	8.73929e-17	1.23348	up
LITCHI001675.m1.gene	1.91817e-07	3.76146	up
LITCHI005171.m1.gene	0.000760141	-0.925844	down
LITCHI020164.m1.gene	0.033613	-0.769457	down
LITCHI023161.m1.gene	6.32865e-06	-1.54367	down
Litchi_chinensis_newGene_5822	2.40519e-12	-9.53725	down
LITCHI003371.m4.gene	0.00306256	-1.25167	down
LITCHI003992.m1.gene	0.0378889	-1.40127	down
LITCHI008346.m3.gene	0.0416742	-0.722053	down
LITCHI020055.m1.gene	1.17971e-09	-1.31261	down
LITCHI028684.m1.gene	0.011874	-0.606911	down
LITCHI008622.m1.gene	0.00111481	-2.28512	down
LITCHI006779.m1.gene	3.37715e-11	-0.8734	down
LITCHI028989.m1.gene	0.000372236	0.741424	up
LITCHI009059.m1.gene	2.27242e-07	1.22254	up
LITCHI010057.m1.gene	0.0232183	-0.81044	down
LITCHI017198.m1.gene	2.36837e-12	-0.781915	down
LITCHI021212.m1.gene	1.03608e-09	1.07192	up
LITCHI004470.m1.gene	0.0161337	-0.635027	down
LITCHI016729.m1.gene	0.0338877	0.834107	up
LITCHI013154.m1.gene	0.048522	-1.07383	down
LITCHI015533.m2.gene	0.0436647	-0.843437	down
LITCHI002779.m1.gene	0.0259508	0.748415	up
LITCHI003041.m1.gene	0.0183761	-1.22481	down
LITCHI027622.m1.gene	1.24031e-24	-1.35352	down
LITCHI008367.m1.gene	4.18096e-18	0.664972	up
LITCHI022374.m1.gene	8.94897e-15	-2.07245	down
LITCHI009274.m1.gene	1.34123e-10	-2.22226	down
LITCHI008177.m1.gene	1.40741e-10	0.682888	up
LITCHI024935.m1.gene	1.29671e-05	-0.702354	down
LITCHI026384.m1.gene	0.00125458	-1.44856	down
LITCHI024655.m1.gene	0.00459069	-1.3767	down
LITCHI021309.m1.gene	5.36423e-19	1.34448	up
LITCHI027581.m1.gene	0.00285892	-0.819094	down
LITCHI029701.m1.gene	1.74614e-20	3.37401	up
LITCHI017726.m1.gene	0.0239101	0.769475	up
LITCHI026552.m1.gene	0.0188585	-1.37723	down
LITCHI004239.m1.gene	0.000915702	0.757002	up
LITCHI007743.m2.gene	3.08371e-23	1.61417	up
LITCHI021968.m1.gene	0.0215446	-0.838091	down
LITCHI000366.m1.gene	0.00827584	1.40516	up
LITCHI025196.m1.gene	4.14771e-18	-0.7013	down
LITCHI009039.m1.gene	6.5781e-12	9.44641	up
LITCHI014959.m1.gene	7.64928e-09	-1.20291	down
LITCHI024507.m1.gene	0.0135111	1.42453	up
LITCHI030949.m1.gene	4.46307e-20	-1.32653	down
LITCHI014550.m1.gene	0.0103368	-0.635301	down
LITCHI021009.m2.gene	1.41773e-11	1.45668	up
LITCHI020266.m5.gene	3.05591e-05	-0.851976	down
LITCHI018812.m1.gene	6.27884e-05	-0.812118	down
LITCHI004843.m1.gene	1.25997e-48	0.643553	up
LITCHI019107.m1.gene	0.0137751	-0.958654	down
LITCHI022261.m1.gene	2.35642e-06	-1.64999	down
Litchi_chinensis_newGene_2670	3.62622e-08	-1.07096	down
LITCHI013091.m1.gene	0.00292285	-0.817179	down
LITCHI012511.m3.gene	2.71091e-11	-9.41088	down
LITCHI013129.m1.gene	9.552e-05	-0.620828	down
LITCHI016850.m1.gene	0.041504	0.716536	up
LITCHI018797.m1.gene	0.0395279	-0.886061	down
LITCHI024583.m1.gene	9.90032e-24	12.535	up
LITCHI009206.m1.gene	8.3824e-05	1.6017	up
LITCHI023192.m1.gene	8.24268e-18	-11.0619	down
LITCHI014961.m1.gene	1.84277e-32	0.710097	up
LITCHI002507.m2.gene	0.00580032	1.26816	up
LITCHI024178.m1.gene	0.00582659	3.01267	up
LITCHI017426.m1.gene	1.50792e-13	-1.00027	down
LITCHI015040.m1.gene	5.6272e-11	0.984628	up
LITCHI001832.m1.gene	1.31712e-05	0.646068	up
LITCHI003418.m1.gene	0.00086337	-1.12316	down
LITCHI018196.m1.gene	0.00416971	-0.809152	down
LITCHI030688.m1.gene	0.000879357	0.891589	up
LITCHI003585.m1.gene	2.70123e-07	-0.65132	down
LITCHI012904.m2.gene	0.00350914	0.656693	up
LITCHI027926.m1.gene	1.1827e-07	0.938009	up
LITCHI004726.m5.gene	0.00751064	0.652595	up
LITCHI015815.m1.gene	0.00193508	-0.785435	down
LITCHI022781.m9.gene	0.000965354	0.640564	up
LITCHI024098.m1.gene	0.00409645	-1.19771	down
LITCHI002007.m1.gene	0.000162587	-1.01677	down
LITCHI019763.m1.gene	2.04916e-08	-0.628671	down
LITCHI015008.m2.gene	0.00676237	-1.01357	down
LITCHI003970.m1.gene	6.43661e-22	2.77766	up
LITCHI021483.m1.gene	0.0057473	-0.782197	down
LITCHI017070.m1.gene	0.0165832	0.771997	up
LITCHI017599.m1.gene	1.70654e-06	-0.868665	down
LITCHI027413.m1.gene	0.0308299	0.666463	up
LITCHI010727.m1.gene	0.00193944	1.01428	up
LITCHI010793.m1.gene	0.0182568	0.876913	up
LITCHI002507.m3.gene	0.0286671	-0.953196	down
LITCHI029374.m1.gene	0.00146636	0.702075	up
LITCHI004812.m1.gene	3.56004e-05	0.784506	up
LITCHI018706.m1.gene	0.0462033	1.14952	up
LITCHI023835.m1.gene	7.81624e-10	-0.752704	down
LITCHI018492.m1.gene	0.000397395	-0.677568	down
LITCHI002375.m1.gene	0.0416627	-0.93427	down
LITCHI003182.m1.gene	0.0137676	1.27839	up
LITCHI013324.m2.gene	4.08527e-05	1.29284	up
LITCHI024601.m1.gene	9.51641e-09	-4.05005	down
LITCHI013778.m1.gene	9.29145e-16	-0.608726	down
LITCHI020169.m1.gene	0.012442	-0.712169	down
Litchi_chinensis_newGene_2277	0.0335992	-1.9684	down
LITCHI016426.m1.gene	6.87549e-16	1.80104	up
LITCHI026586.m1.gene	0.0463445	-1.07841	down
LITCHI031804.m1.gene	7.45621e-09	0.750229	up
LITCHI007308.m1.gene	3.07017e-38	-0.782697	down
LITCHI026762.m1.gene	3.0789e-15	-2.04285	down
LITCHI008665.m1.gene	6.67419e-11	0.836279	up
LITCHI006899.m1.gene	1.21612e-05	0.635466	up
LITCHI027423.m3.gene	2.81122e-50	0.951321	up
LITCHI022132.m1.gene	0.000244662	0.587065	up
LITCHI010828.m1.gene	3.98955e-05	-0.976386	down
LITCHI011391.m1.gene	2.26169e-113	1.38318	up
LITCHI023485.m1.gene	4.96779e-06	0.973033	up
LITCHI019764.m1.gene	9.0827e-08	-0.72782	down
LITCHI029314.m1.gene	0.0226848	0.696257	up
LITCHI011873.m1.gene	0.0222343	-0.879165	down
LITCHI010533.m1.gene	5.70377e-13	-0.818921	down
LITCHI024365.m1.gene	5.9085e-10	0.742415	up
LITCHI003624.m10.gene	2.23719e-15	-0.812795	down
LITCHI006731.m1.gene	0.0217021	-0.992751	down
LITCHI029670.m1.gene	4.9753e-30	0.722988	up
LITCHI001542.m1.gene	7.96878e-19	0.631177	up
LITCHI003569.m1.gene	0.00491922	0.74166	up
LITCHI020398.m1.gene	9.39287e-20	-0.837596	down
LITCHI018294.m1.gene	1.5958e-13	0.702767	up
LITCHI001377.m4.gene	0.000913256	-0.601976	down
LITCHI019161.m1.gene	0.00567056	0.643526	up
LITCHI020000.m1.gene	2.45237e-06	-0.923852	down
LITCHI011075.m1.gene	0.0180891	2.01452	up
LITCHI007163.m1.gene	3.50362e-37	-0.833144	down
LITCHI029597.m1.gene	2.94765e-07	4.06555	up
LITCHI026784.m1.gene	0.000975278	-0.643886	down
LITCHI001127.m1.gene	6.97854e-06	-0.938836	down
LITCHI018280.m1.gene	0.00110852	-1.04682	down
LITCHI005675.m1.gene	0.00778367	-0.760649	down
LITCHI010153.m1.gene	0.00610022	-0.604387	down
LITCHI001887.m1.gene	0.00517747	-1.73968	down
LITCHI001553.m1.gene	8.67983e-06	1.23789	up
LITCHI028590.m9.gene	6.23642e-05	-0.766565	down
LITCHI004307.m1.gene	0.0239877	0.699803	up
LITCHI021883.m1.gene	0.0364764	0.697603	up
LITCHI018756.m1.gene	1.66182e-32	2.25082	up
LITCHI020324.m1.gene	0.0106432	-0.723405	down
LITCHI031160.m1.gene	0.000765667	4.33722	up
LITCHI017700.m1.gene	8.02733e-25	1.06746	up
LITCHI007142.m4.gene	0.0371418	-1.21931	down
LITCHI015638.m1.gene	1.08759e-12	-1.38699	down
LITCHI013121.m1.gene	0.0215768	0.88261	up
LITCHI010273.m1.gene	0.012399	2.17122	up
LITCHI027285.m1.gene	1.76472e-06	-0.648865	down
LITCHI016321.m1.gene	2.18553e-06	0.711279	up
LITCHI001382.m1.gene	8.44958e-10	0.774685	up
LITCHI026054.m1.gene	2.16001e-08	0.81427	up
LITCHI024942.m1.gene	6.52272e-16	0.906961	up
LITCHI010833.m1.gene	0.011339	-1.20729	down
LITCHI005839.m1.gene	0.0151111	-0.769186	down
LITCHI019131.m1.gene	2.01542e-28	0.875533	up
Litchi_chinensis_newGene_7901	0.00409973	1.32841	up
Litchi_chinensis_newGene_2627	0.00531743	-1.04821	down
LITCHI021270.m1.gene	0.0273543	-0.607731	down
LITCHI008478.m3.gene	0.00227695	-1.69472	down
LITCHI011291.m3.gene	0.0302271	-0.960584	down
LITCHI023181.m2.gene	0.00669614	1.57484	up
LITCHI015892.m1.gene	1.25224e-07	-0.612094	down
LITCHI026906.m2.gene	0.000156141	-0.682222	down
LITCHI021699.m1.gene	4.65347e-14	-0.968164	down
LITCHI022361.m1.gene	0.00640382	-0.680977	down
LITCHI027343.m1.gene	1.82117e-33	-0.819313	down
LITCHI017114.m1.gene	0.000115839	-1.18943	down
LITCHI017389.m1.gene	0.009487	-1.66236	down
LITCHI029698.m1.gene	0.014661	0.985615	up
LITCHI007236.m1.gene	4.91506e-05	1.97512	up
LITCHI001591.m1.gene	1.52196e-15	-0.796087	down
LITCHI029754.m1.gene	1.48451e-23	-0.66661	down
LITCHI025697.m1.gene	2.89623e-05	-1.14156	down
LITCHI024612.m1.gene	1.87808e-05	-1.34861	down
LITCHI007251.m1.gene	1.51031e-17	0.773139	up
LITCHI031071.m1.gene	6.62119e-60	1.08837	up
LITCHI022942.m1.gene	9.12444e-07	-0.999342	down
LITCHI016848.m1.gene	5.03626e-06	-0.983321	down
LITCHI025047.m3.gene	2.9853e-06	-0.925457	down
LITCHI002300.m1.gene	0.00443595	-1.14866	down
LITCHI021561.m1.gene	0.0328225	-1.93616	down
LITCHI006746.m1.gene	2.11139e-14	1.17937	up
LITCHI030708.m1.gene	0.000110237	-0.852535	down
LITCHI001835.m1.gene	5.72235e-28	2.25795	up
LITCHI008692.m1.gene	4.75172e-08	0.970681	up
LITCHI016132.m2.gene	0.000416704	2.7352	up
LITCHI006212.m1.gene	1.84638e-06	-2.18162	down
LITCHI004947.m1.gene	0.0134184	0.784069	up
LITCHI025816.m1.gene	1.37257e-08	-0.764563	down
LITCHI010842.m1.gene	8.09845e-34	-1.36947	down
LITCHI006363.m1.gene	3.32067e-07	1.6989	up
LITCHI007298.m1.gene	5.84717e-12	0.784454	up
LITCHI022387.m3.gene	0.00310977	-1.35129	down
LITCHI026097.m1.gene	1.32082e-05	-0.863948	down
LITCHI021707.m3.gene	0.00632184	0.790921	up
LITCHI001210.m1.gene	7.60176e-14	1.04698	up
LITCHI015757.m1.gene	0.0128294	0.975191	up
LITCHI026497.m3.gene	1.21778e-40	0.953309	up
LITCHI010069.m1.gene	0.00152537	1.23975	up
LITCHI026152.m1.gene	1.48879e-16	-0.768749	down
LITCHI006487.m1.gene	2.08831e-05	0.606846	up
LITCHI003402.m1.gene	1.17301e-36	0.878567	up
LITCHI025117.m2.gene	3.49099e-05	0.72438	up
LITCHI017588.m1.gene	0.0019284	-0.658705	down
LITCHI013625.m1.gene	0.000123372	0.929841	up
LITCHI022516.m1.gene	8.42584e-38	0.591977	up
LITCHI021848.m1.gene	1.5796e-52	1.4355	up
LITCHI018043.m1.gene	2.28072e-09	-0.694301	down
LITCHI021035.m1.gene	8.28689e-05	1.43998	up
LITCHI008114.m1.gene	5.50068e-06	0.924315	up
LITCHI004746.m1.gene	2.46049e-06	0.674067	up
LITCHI005329.m1.gene	0.00626714	-0.66051	down
LITCHI018536.m2.gene	0.042199	-1.11857	down
LITCHI014487.m1.gene	2.07034e-12	-9.56839	down
LITCHI024233.m1.gene	3.6067e-12	-1.88383	down
LITCHI028562.m1.gene	0.025587	-0.593792	down
LITCHI024583.m2.gene	5.45846e-11	-1.05985	down
LITCHI012809.m1.gene	1.49281e-06	3.74024	up
LITCHI016132.m1.gene	5.43551e-06	-6.75515	down
LITCHI020348.m2.gene	6.14786e-10	-0.808088	down
LITCHI018712.m1.gene	0.00222939	-0.707548	down
LITCHI004163.m1.gene	0.00151551	-1.02137	down
LITCHI030516.m1.gene	0.0139901	-0.598016	down
LITCHI026200.m2.gene	2.71464e-14	2.19193	up
LITCHI003914.m1.gene	0.00454804	1.65224	up
LITCHI025383.m1.gene	0.0394502	-0.625012	down
LITCHI028807.m1.gene	7.2886e-05	2.03879	up
LITCHI017539.m5.gene	0.0467089	-0.597994	down
LITCHI025347.m2.gene	0.000223495	2.21939	up
LITCHI007907.m1.gene	1.51882e-22	0.746855	up
LITCHI028808.m1.gene	0.000529125	0.996019	up
LITCHI006328.m1.gene	2.98348e-05	0.587545	up
LITCHI013498.m1.gene	0.00935083	0.602937	up
LITCHI022745.m1.gene	0.0393563	-0.729865	down
LITCHI021984.m1.gene	0.00675178	-0.649483	down
LITCHI006422.m1.gene	8.07895e-16	-1.00384	down
LITCHI015684.m1.gene	4.05682e-05	0.815507	up
LITCHI003379.m1.gene	4.29856e-05	0.827946	up
LITCHI000517.m1.gene	0.00580032	0.7966	up
LITCHI002053.m1.gene	6.28268e-08	1.93889	up
LITCHI005390.m1.gene	0.00745697	0.716863	up
Litchi_chinensis_newGene_911	0.00106268	-0.638288	down
LITCHI001353.m1.gene	4.71196e-08	0.890654	up
LITCHI013780.m1.gene	0.0118377	-0.713964	down
LITCHI015503.m1.gene	5.73962e-12	0.619589	up
LITCHI008482.m1.gene	6.49309e-21	1.20527	up
LITCHI024947.m1.gene	0.0399937	0.704724	up
LITCHI026635.m10.gene	1.1682e-10	2.49552	up
Litchi_chinensis_newGene_5808	0.00143438	-0.987128	down
LITCHI019412.m1.gene	0.00295177	0.808582	up
LITCHI027473.m1.gene	0.000479954	0.837412	up
LITCHI017884.m1.gene	8.38121e-30	0.834376	up
LITCHI008391.m1.gene	0.0366887	-0.851898	down
LITCHI026299.m1.gene	8.62441e-05	0.980701	up
LITCHI026453.m1.gene	5.48347e-20	0.708964	up
LITCHI025724.m2.gene	2.17219e-07	-3.38201	down
LITCHI005631.m1.gene	0.000574145	-1.41022	down
LITCHI026765.m3.gene	0.00235626	-2.27814	down
LITCHI020276.m6.gene	7.70401e-07	-1.0496	down
LITCHI021330.m1.gene	3.08722e-14	-0.932276	down
LITCHI027085.m1.gene	0.0196815	-0.782284	down
LITCHI004851.m1.gene	4.39082e-27	-0.659022	down
LITCHI011622.m1.gene	0.00915518	-0.948871	down
LITCHI014347.m2.gene	0.000343956	-0.769466	down
LITCHI010557.m1.gene	4.86594e-17	0.765599	up
LITCHI019201.m7.gene	0.00671926	0.85586	up
LITCHI009615.m1.gene	1.77496e-13	0.769833	up
LITCHI030387.m1.gene	0.000450005	-0.697517	down
LITCHI005438.m1.gene	0.0111619	0.974716	up
LITCHI010378.m1.gene	1.73788e-18	0.804088	up
LITCHI010045.m1.gene	0.037599	-0.780448	down
LITCHI001568.m1.gene	0.0130824	-0.711162	down
LITCHI025535.m1.gene	0.0208836	1.26409	up
LITCHI020231.m1.gene	3.59208e-11	0.992584	up
LITCHI004065.m1.gene	0.0011087	0.834318	up
Litchi_chinensis_newGene_5722	0.000116985	0.701312	up
LITCHI028955.m1.gene	0.00947783	-0.680207	down
LITCHI029020.m1.gene	0.0462033	-3.42438	down
LITCHI002714.m1.gene	2.08831e-05	-1.51379	down
LITCHI007525.m2.gene	0.00165335	-0.591038	down
LITCHI026454.m1.gene	9.15396e-16	0.76441	up
LITCHI029275.m1.gene	0.000116559	1.40175	up
LITCHI002054.m1.gene	2.70837e-11	0.638982	up
LITCHI000687.m2.gene	1.17287e-17	-0.786322	down
LITCHI016611.m1.gene	3.34941e-84	0.829602	up
LITCHI005672.m1.gene	4.22076e-10	-0.796258	down
LITCHI010860.m1.gene	4.94237e-20	1.35642	up
LITCHI025558.m1.gene	0.0473241	-0.823236	down
LITCHI025956.m1.gene	0.000143634	-0.641508	down
LITCHI021647.m1.gene	1.69009e-24	-0.865556	down
LITCHI005667.m1.gene	1.45242e-05	-0.753778	down
LITCHI030224.m1.gene	0.0307233	0.611293	up
LITCHI006895.m1.gene	4.88886e-10	-0.595345	down
LITCHI024578.m1.gene	0.00150671	0.747652	up
LITCHI016318.m1.gene	0.0139984	-0.948105	down
LITCHI002004.m1.gene	0.00458391	-1.22465	down
LITCHI028927.m1.gene	0.00255355	-1.70129	down
LITCHI026407.m3.gene	1.3881e-107	5.42945	up
LITCHI022404.m1.gene	9.91466e-39	0.829333	up
LITCHI015895.m1.gene	8.45347e-05	-0.728002	down
LITCHI014225.m1.gene	3.51822e-12	0.713009	up
LITCHI008740.m2.gene	0.00770506	1.22135	up
LITCHI022490.m1.gene	0.0449179	-1.36704	down
LITCHI006304.m1.gene	5.9828e-18	1.56821	up
LITCHI025574.m1.gene	0.000609621	-0.598252	down
LITCHI006761.m1.gene	0.0348243	1.01413	up
LITCHI013089.m1.gene	6.11648e-10	-1.01951	down
LITCHI011187.m1.gene	1.7843e-10	0.971945	up
LITCHI017935.m1.gene	1.40145e-20	-0.683752	down
LITCHI029010.m1.gene	1.87792e-08	-0.593649	down
LITCHI011087.m1.gene	1.0168e-40	4.78304	up
LITCHI019034.m1.gene	4.14292e-41	0.607633	up
LITCHI024186.m1.gene	5.66987e-26	0.65892	up
LITCHI029543.m1.gene	2.99403e-05	-3.46785	down
LITCHI005411.m1.gene	6.01782e-15	0.774162	up
LITCHI011268.m1.gene	1.73505e-15	-0.94512	down
LITCHI003595.m1.gene	4.22063e-06	0.821977	up
LITCHI022387.m1.gene	0.000172322	-0.639439	down
LITCHI029274.m1.gene	0.0116878	-0.774133	down
LITCHI014891.m1.gene	7.30077e-93	1.06034	up
LITCHI025432.m2.gene	5.93109e-20	-1.74333	down
LITCHI021501.m1.gene	2.09545e-13	0.590042	up
LITCHI017488.m1.gene	0.000922388	1.02195	up
LITCHI019554.m1.gene	0.0307086	-1.07374	down
LITCHI014515.m1.gene	0.0496556	0.670905	up
LITCHI030778.m2.gene	6.75115e-05	1.07289	up
LITCHI021741.m1.gene	0.0224626	-0.744774	down
LITCHI007246.m3.gene	3.77836e-13	0.933308	up
LITCHI023309.m1.gene	0.00473074	-0.787101	down
LITCHI008057.m3.gene	0.00121461	-1.4244	down
LITCHI004085.m1.gene	7.30577e-05	-1.15915	down
LITCHI011473.m1.gene	3.60609e-10	-0.614393	down
LITCHI013323.m1.gene	4.8178e-10	1.45824	up
LITCHI010280.m1.gene	7.33689e-08	-1.54161	down
LITCHI001244.m10.gene	0.0215032	-0.810313	down
LITCHI018040.m1.gene	7.13815e-12	-0.773275	down
LITCHI006959.m1.gene	2.746e-13	-1.60584	down
LITCHI011384.m1.gene	0.00256392	1.8622	up
LITCHI010643.m1.gene	8.55661e-12	0.596853	up
LITCHI014226.m1.gene	0.00411083	-1.37081	down
LITCHI004556.m1.gene	3.26421e-24	-0.730471	down
LITCHI014952.m1.gene	3.21397e-30	0.734589	up
LITCHI021612.m1.gene	0.0293548	-1.33959	down
LITCHI030265.m1.gene	0.00468488	0.662795	up
LITCHI017406.m1.gene	0.00315579	0.933681	up
LITCHI008387.m1.gene	4.11973e-13	0.744201	up
LITCHI001824.m3.gene	0.0377281	0.901584	up
LITCHI027648.m1.gene	0.00261344	1.36016	up
LITCHI014465.m1.gene	4.58406e-07	-0.806888	down
LITCHI021130.m1.gene	1.44459e-11	0.79156	up
LITCHI005410.m1.gene	0.00459745	2.19032	up
LITCHI022471.m2.gene	1.82637e-08	-0.630963	down
LITCHI002550.m1.gene	0.0135985	-0.792065	down
Litchi_chinensis_newGene_3641	0.00987794	1.25824	up
LITCHI009852.m1.gene	3.21367e-05	0.617117	up
LITCHI023161.m2.gene	1.2084e-07	0.747443	up
LITCHI004115.m1.gene	0.0357703	1.29759	up
LITCHI024988.m1.gene	3.6474e-11	1.2781	up
LITCHI031054.m1.gene	4.07661e-16	1.00518	up
LITCHI030346.m1.gene	2.81297e-09	-0.788381	down
LITCHI022398.m1.gene	1.19474e-07	-0.646311	down
LITCHI025860.m5.gene	0.0139551	-0.802526	down
LITCHI020736.m1.gene	2.80819e-36	-2.95033	down
LITCHI016334.m1.gene	0.0235801	-0.750407	down
LITCHI011650.m1.gene	0.0442776	-0.843657	down
LITCHI012236.m1.gene	0.00375934	-1.01035	down
LITCHI025538.m1.gene	0.0227975	-0.88081	down
LITCHI015631.m1.gene	2.56326e-13	-0.815622	down
LITCHI017497.m1.gene	3.81761e-13	0.685019	up
LITCHI007965.m1.gene	0.00484263	-0.64497	down
LITCHI010128.m1.gene	6.73912e-08	1.29091	up
LITCHI023708.m1.gene	0.0110933	-0.617908	down
LITCHI005522.m1.gene	0.00806693	-0.599114	down
LITCHI005455.m1.gene	2.11401e-12	1.04116	up
LITCHI022925.m1.gene	0.00844935	0.892979	up
LITCHI019382.m1.gene	0.0211147	-2.02467	down
LITCHI031673.m2.gene	3.70591e-12	0.711158	up
LITCHI017408.m1.gene	8.3593e-35	1.84194	up
LITCHI007326.m1.gene	0.00022192	1.30496	up
LITCHI008612.m1.gene	2.09713e-37	1.37436	up
LITCHI022754.m1.gene	0.0204222	-0.588427	down
LITCHI017805.m2.gene	3.46488e-13	0.70808	up
LITCHI024837.m1.gene	5.75004e-06	-0.827107	down
LITCHI015705.m1.gene	0.00029649	0.925271	up
LITCHI003511.m1.gene	3.02871e-16	-0.620992	down
LITCHI009112.m2.gene	2.67801e-06	-3.431	down
LITCHI006494.m1.gene	2.65355e-13	0.630093	up
LITCHI004269.m1.gene	0.000146702	1.04594	up
LITCHI001466.m1.gene	1.25403e-09	1.02487	up
LITCHI030998.m1.gene	3.42634e-09	-1.33204	down
LITCHI016896.m1.gene	1.81718e-22	-1.01309	down
LITCHI025895.m1.gene	3.04038e-07	-1.21296	down
LITCHI014634.m1.gene	0.00185683	0.682888	up

## Sheet: DEmRNAs in leaves
Summary of DEmRNAs identified in leaves
ID	FDR	log2FC	regulated
LITCHI019480.m9.gene	3.52915e-12	3.18292	up
LITCHI030560.m1.gene	0.00077633	-0.61249	down
LITCHI001398.m1.gene	0.0394774	-1.39719	down
LITCHI006461.m1.gene	2.27254e-16	4.57811	up
LITCHI016832.m1.gene	0.00705679	-0.882642	down
LITCHI005887.m1.gene	0.047416	0.933745	up
LITCHI023456.m1.gene	4.64146e-23	1.40811	up
LITCHI004176.m1.gene	0.00223764	1.47553	up
LITCHI004345.m1.gene	0.000102393	-0.65443	down
LITCHI005008.m1.gene	4.11047e-22	-1.82713	down
LITCHI025952.m1.gene	3.35883e-05	-1.7655	down
LITCHI031068.m1.gene	3.32153e-13	-12.9682	down
LITCHI027850.m1.gene	1.67525e-159	2.08418	up
LITCHI016831.m1.gene	0.0104841	-0.660834	down
LITCHI011229.m1.gene	1.97724e-05	0.665288	up
LITCHI025738.m1.gene	1.51451e-19	0.602882	up
LITCHI010096.m1.gene	1.9647e-05	-0.972404	down
LITCHI010101.m1.gene	3.00653e-10	-1.0749	down
LITCHI020899.m1.gene	0.0274463	0.891045	up
LITCHI010839.m1.gene	0.017144	0.838131	up
Litchi_chinensis_newGene_2446	0.0436619	1.14976	up
LITCHI009692.m8.gene	0.0470959	1.20466	up
LITCHI003601.m1.gene	0.00541518	1.52749	up
LITCHI026044.m2.gene	1.68194e-17	-0.78075	down
LITCHI029527.m1.gene	0.00235767	1.11178	up
LITCHI022839.m3.gene	3.40552e-07	1.81353	up
LITCHI016143.m1.gene	0.000139921	-0.703383	down
LITCHI017646.m1.gene	0.023115	0.802908	up
Litchi_chinensis_newGene_8295	0.0061124	-0.956819	down
LITCHI026096.m1.gene	7.32688e-10	3.47002	up
LITCHI030332.m1.gene	1.34412e-06	-0.814219	down
LITCHI021316.m1.gene	7.47105e-08	1.32306	up
LITCHI000720.m1.gene	0.00914312	1.798	up
LITCHI005416.m1.gene	0.000365884	-1.49013	down
LITCHI013065.m2.gene	0.000600476	-2.38341	down
LITCHI006967.m1.gene	0.0360907	-1.86275	down
LITCHI001977.m1.gene	0.0343424	1.49618	up
LITCHI024965.m1.gene	0.000337285	-0.649462	down
LITCHI006810.m1.gene	2.74444e-05	-0.617292	down
LITCHI016434.m1.gene	3.4665e-05	-2.64548	down
LITCHI008759.m1.gene	1.43904e-17	-1.218	down
LITCHI030207.m1.gene	9.84551e-12	-0.85079	down
LITCHI001530.m1.gene	0.00172728	0.686729	up
LITCHI026665.m1.gene	6.06399e-18	0.692133	up
LITCHI001179.m1.gene	1.03646e-11	0.79539	up
LITCHI023850.m1.gene	0.0104527	3.92453	up
LITCHI023882.m1.gene	1.82309e-05	0.619277	up
LITCHI003413.m1.gene	0.00647327	0.603341	up
LITCHI026605.m1.gene	0.0138482	0.674052	up
LITCHI004114.m1.gene	2.19988e-07	1.51252	up
LITCHI028800.m1.gene	7.78008e-15	1.28242	up
LITCHI021181.m1.gene	4.44786e-07	-1.29095	down
LITCHI018243.m1.gene	8.32372e-14	1.03866	up
LITCHI009129.m1.gene	0.0294066	-1.0354	down
LITCHI015356.m1.gene	0.000227943	1.36345	up
LITCHI025233.m1.gene	7.94906e-27	4.24914	up
LITCHI018021.m2.gene	3.13788e-50	1.05926	up
LITCHI028001.m1.gene	1.50997e-12	0.907647	up
LITCHI027987.m1.gene	0.000490255	-2.02024	down
LITCHI001674.m1.gene	0.00109491	1.10755	up
LITCHI030634.m1.gene	0.00209074	-0.606363	down
LITCHI021783.m2.gene	2.01834e-05	0.97561	up
LITCHI022222.m1.gene	0.0217509	0.697031	up
LITCHI021944.m2.gene	0.0299829	0.877247	up
LITCHI001594.m1.gene	0.00608969	-0.607188	down
LITCHI011691.m2.gene	3.57792e-07	-0.66863	down
LITCHI002514.m1.gene	9.5546e-07	2.24366	up
LITCHI027517.m1.gene	0.000238873	0.746065	up
LITCHI007976.m1.gene	0.000108726	3.14775	up
LITCHI015548.m1.gene	6.84799e-05	0.600681	up
LITCHI020858.m1.gene	0.0191152	-1.06534	down
LITCHI006355.m1.gene	1.47294e-15	-1.35118	down
LITCHI016077.m1.gene	0.0123116	-0.96936	down
LITCHI001688.m1.gene	0.000129536	0.794233	up
LITCHI030703.m10.gene	0.00246291	-1.51696	down
LITCHI003885.m1.gene	0.00228746	-2.08862	down
LITCHI019142.m1.gene	0.00283077	1.63661	up
LITCHI028940.m1.gene	1.67129e-09	-0.697348	down
LITCHI016794.m1.gene	0.0198754	-0.771092	down
LITCHI029559.m1.gene	6.11665e-26	-1.35528	down
LITCHI020078.m1.gene	0.0350843	0.668358	up
LITCHI011751.m1.gene	0.0432174	-0.77991	down
Litchi_chinensis_newGene_2323	9.90222e-126	-3.89656	down
LITCHI019201.m6.gene	7.04384e-95	0.727044	up
LITCHI015510.m1.gene	0.019482	1.03634	up
LITCHI016372.m1.gene	4.49048e-09	8.79588	up
LITCHI004741.m1.gene	0.0258874	-0.870119	down
LITCHI018698.m1.gene	0.0176314	1.4009	up
LITCHI008772.m1.gene	0.0350022	-2.58647	down
LITCHI006500.m1.gene	0.0357798	-0.637145	down
LITCHI000594.m1.gene	4.25926e-07	3.00013	up
LITCHI011934.m1.gene	2.49823e-05	-0.792912	down
LITCHI000600.m1.gene	1.49266e-08	1.04052	up
LITCHI021923.m1.gene	1.25917e-08	0.64708	up
LITCHI028660.m1.gene	0.0158692	-0.745185	down
LITCHI003608.m1.gene	0.0292882	-0.825164	down
LITCHI014700.m1.gene	0.00138043	0.594153	up
LITCHI028856.m1.gene	0.00032113	1.67952	up
LITCHI026360.m1.gene	0.0453025	0.693855	up
LITCHI027700.m1.gene	1.79388e-10	1.07339	up
LITCHI030483.m1.gene	4.48846e-75	2.00961	up
LITCHI001584.m1.gene	8.05455e-16	0.641533	up
LITCHI011018.m1.gene	2.79388e-12	-0.674134	down
LITCHI028688.m1.gene	0.000109584	-0.59782	down
LITCHI030357.m4.gene	4.32595e-05	-0.712285	down
LITCHI018815.m1.gene	0.0225723	-0.667448	down
LITCHI003304.m1.gene	2.87474e-06	-0.836816	down
LITCHI021424.m1.gene	0.00010544	-0.837366	down
LITCHI027329.m2.gene	1.17732e-14	1.01073	up
LITCHI012625.m1.gene	1.07723e-08	2.57041	up
LITCHI022337.m1.gene	0.0018458	-0.616062	down
LITCHI020156.m1.gene	0.00473225	0.925185	up
LITCHI016272.m1.gene	0.0251864	1.44883	up
LITCHI023121.m1.gene	1.10083e-05	0.879531	up
LITCHI014637.m1.gene	0.000507476	0.833953	up
LITCHI007076.m6.gene	0.0471966	1.62763	up
LITCHI031544.m1.gene	0.00804298	-0.739156	down
LITCHI020857.m1.gene	1.51526e-09	-0.931268	down
LITCHI022827.m1.gene	0.00426091	-0.587313	down
LITCHI029790.m1.gene	0.00416543	-0.657669	down
LITCHI027853.m1.gene	1.68616e-15	0.643337	up
LITCHI016723.m1.gene	2.81101e-22	0.9271	up
LITCHI018912.m1.gene	0.000336901	2.59766	up
LITCHI012579.m1.gene	6.16194e-28	-1.08615	down
LITCHI022830.m1.gene	0.0307431	1.24331	up
LITCHI011549.m1.gene	0.00319942	0.922093	up
LITCHI023329.m1.gene	1.29443e-07	-0.86946	down
LITCHI011071.m1.gene	2.05941e-22	1.6299	up
LITCHI005175.m1.gene	0.00636108	1.13751	up
LITCHI016632.m1.gene	0.0347327	1.36838	up
LITCHI010779.m1.gene	6.28446e-28	-0.791445	down
LITCHI018979.m1.gene	7.94772e-11	1.57744	up
LITCHI004943.m5.gene	6.50422e-05	-1.11061	down
LITCHI019098.m1.gene	0.0413904	-0.855259	down
Litchi_chinensis_newGene_3153	0.0225723	-0.995772	down
LITCHI005947.m2.gene	0.00539442	-0.819636	down
LITCHI030432.m1.gene	0.00747778	-1.00511	down
LITCHI020317.m1.gene	1.84029e-08	-0.83054	down
LITCHI016270.m1.gene	1.88898e-05	2.82404	up
LITCHI025415.m1.gene	0.000720058	-0.820075	down
LITCHI007191.m1.gene	5.04081e-27	3.44318	up
LITCHI028448.m1.gene	3.568e-37	0.837025	up
LITCHI026509.m1.gene	5.92171e-07	-0.634087	down
LITCHI016357.m1.gene	0.00234945	-0.879365	down
Litchi_chinensis_newGene_6880	0.038458	0.89658	up
LITCHI001412.m1.gene	0.000296343	0.603476	up
LITCHI022933.m1.gene	0.00848907	0.608334	up
LITCHI011077.m2.gene	0.01007	-1.37378	down
LITCHI005241.m1.gene	1.26762e-05	1.1458	up
LITCHI007034.m1.gene	0.0314136	0.683716	up
LITCHI006751.m1.gene	0.00323421	1.06876	up
LITCHI016203.m1.gene	0.000647778	1.71774	up
LITCHI030858.m1.gene	8.42888e-14	-1.36743	down
LITCHI029288.m1.gene	0.0261352	1.0316	up
LITCHI029086.m1.gene	2.31655e-18	0.978398	up
LITCHI014496.m1.gene	3.98148e-14	-1.61698	down
LITCHI006547.m6.gene	0.00177199	-1.56843	down
LITCHI019785.m1.gene	5.28869e-21	0.830682	up
LITCHI012558.m1.gene	1.00642e-13	0.913046	up
LITCHI023140.m1.gene	0.000944359	1.6952	up
LITCHI008600.m1.gene	0.00907032	-0.722637	down
LITCHI025080.m1.gene	0.0194103	1.35834	up
LITCHI006315.m1.gene	0.00222788	0.675091	up
LITCHI018629.m1.gene	0.0159394	-1.13446	down
LITCHI022284.m1.gene	0.00162673	0.990064	up
LITCHI007063.m20.gene	1.46035e-06	-0.667084	down
LITCHI004342.m1.gene	4.4736e-07	1.84872	up
LITCHI011244.m1.gene	1.39448e-05	1.30296	up
LITCHI023024.m1.gene	0.0117441	0.83555	up
LITCHI012016.m1.gene	1.22859e-63	1.04753	up
LITCHI022796.m1.gene	2.11516e-12	-0.82438	down
LITCHI017324.m1.gene	0.0175875	-0.756363	down
LITCHI024785.m1.gene	4.77973e-13	0.705245	up
LITCHI025228.m1.gene	9.5176e-50	2.72374	up
LITCHI026642.m1.gene	4.88676e-05	-2.57281	down
LITCHI016581.m1.gene	3.39093e-05	-0.967469	down
LITCHI022571.m1.gene	2.11527e-12	10.0034	up
LITCHI022205.m1.gene	6.77354e-10	1.29031	up
LITCHI023841.m5.gene	0.00703727	-2.10507	down
LITCHI015682.m1.gene	0.00345884	-0.725215	down
LITCHI013501.m1.gene	5.50469e-10	1.23093	up
LITCHI004635.m1.gene	0.0366093	-0.660164	down
LITCHI001325.m5.gene	0.0302506	0.593003	up
LITCHI011600.m1.gene	6.95918e-15	0.740586	up
LITCHI021345.m3.gene	0.00105297	-2.11092	down
LITCHI015484.m1.gene	0.020614	-1.22741	down
LITCHI020838.m1.gene	3.97607e-13	0.733541	up
LITCHI013517.m2.gene	0.0167507	-0.859063	down
LITCHI029885.m1.gene	5.12237e-05	0.835761	up
LITCHI015508.m1.gene	1.64983e-21	1.08632	up
Litchi_chinensis_newGene_3744	4.62906e-06	0.82334	up
LITCHI024725.m1.gene	0.0164375	-0.629477	down
LITCHI016536.m1.gene	0.00275145	-0.755114	down
LITCHI006361.m1.gene	1.10081e-05	1.24428	up
LITCHI007653.m1.gene	6.65673e-05	-1.0755	down
LITCHI011121.m1.gene	8.11362e-43	0.996926	up
LITCHI025631.m1.gene	0.0104089	0.987853	up
LITCHI010993.m1.gene	8.8072e-16	1.32182	up
LITCHI004193.m1.gene	8.96402e-25	0.863521	up
LITCHI015227.m1.gene	5.81837e-05	-0.644253	down
LITCHI030863.m1.gene	5.93798e-09	-0.982262	down
LITCHI014915.m1.gene	4.63021e-05	-1.36166	down
LITCHI024964.m1.gene	0.000151131	-1.00474	down
LITCHI019350.m1.gene	3.23652e-10	-0.982205	down
LITCHI018342.m1.gene	9.33039e-12	0.793905	up
LITCHI004885.m1.gene	0.00350623	0.671691	up
LITCHI024220.m1.gene	1.99936e-12	2.25862	up
LITCHI023464.m1.gene	1.015e-07	0.772599	up
LITCHI027346.m1.gene	0.0010036	-1.04605	down
LITCHI011182.m1.gene	0.0415807	-0.658313	down
LITCHI016584.m1.gene	1.87234e-16	-0.651197	down
LITCHI020381.m1.gene	9.8267e-07	2.22709	up
LITCHI027265.m1.gene	2.09708e-08	1.00363	up
LITCHI029534.m1.gene	2.42034e-05	0.699101	up
LITCHI004841.m1.gene	7.2063e-11	1.19068	up
LITCHI011086.m1.gene	0.0019004	-0.71718	down
LITCHI029350.m1.gene	0.0412814	-2.48098	down
LITCHI015371.m3.gene	1.88661e-05	-0.883294	down
LITCHI005974.m1.gene	0.0318094	-0.844913	down
LITCHI025618.m1.gene	0.000212173	1.11785	up
LITCHI006456.m1.gene	2.01141e-18	-1.58678	down
LITCHI001741.m2.gene	5.98721e-06	-0.995967	down
LITCHI020723.m1.gene	1.3217e-05	-1.20035	down
LITCHI003035.m1.gene	0.0208974	1.22168	up
LITCHI025868.m1.gene	0.0395674	0.666916	up
LITCHI010490.m1.gene	6.58321e-14	1.01979	up
LITCHI027411.m1.gene	7.23453e-07	-2.33446	down
LITCHI026756.m1.gene	0.00384288	0.772874	up
LITCHI008779.m1.gene	1.41802e-111	1.80236	up
LITCHI029133.m1.gene	5.04865e-18	0.917202	up
LITCHI012418.m3.gene	0.00237302	-0.996101	down
LITCHI022002.m1.gene	1.72589e-94	2.97147	up
LITCHI007823.m1.gene	0.00703727	-0.858411	down
LITCHI025947.m1.gene	0.00057585	-1.87975	down
LITCHI002882.m1.gene	0.00086581	0.662191	up
LITCHI014768.m1.gene	2.97384e-05	0.781609	up
Litchi_chinensis_newGene_7636	0.0134679	-1.18086	down
LITCHI012081.m1.gene	4.41104e-06	0.614277	up
LITCHI028721.m1.gene	0.0394227	0.642229	up
LITCHI025941.m1.gene	0.000206281	-0.683099	down
LITCHI018448.m1.gene	1.69261e-24	2.48	up
LITCHI005111.m1.gene	6.73863e-05	0.967943	up
LITCHI014765.m1.gene	4.01264e-30	1.01029	up
LITCHI023802.m1.gene	0.0305314	0.686729	up
LITCHI018490.m1.gene	4.588e-07	-0.769985	down
LITCHI012432.m1.gene	0.0179343	-1.28619	down
LITCHI025166.m1.gene	0.00194244	0.594455	up
LITCHI015417.m1.gene	0.0211189	-1.42829	down
LITCHI018863.m1.gene	0.000714878	0.727867	up
LITCHI006003.m1.gene	9.23148e-10	-8.8737	down
LITCHI001241.m1.gene	8.83207e-05	-0.935278	down
LITCHI016780.m4.gene	4.84177e-14	-1.03595	down
LITCHI012883.m1.gene	0.00150796	-0.821757	down
LITCHI019543.m1.gene	3.01009e-06	-0.863537	down
LITCHI027843.m1.gene	1.47713e-23	0.866729	up
LITCHI010771.m10.gene	0.0143044	-1.53644	down
LITCHI009031.m1.gene	4.16491e-23	1.33732	up
LITCHI024832.m2.gene	3.63391e-07	-2.23717	down
LITCHI030721.m1.gene	1.82273e-06	-0.58526	down
LITCHI021463.m20.gene	0.00211595	0.734442	up
LITCHI021211.m1.gene	0.000313252	4.05824	up
LITCHI012266.m1.gene	0.0429676	1.21381	up
LITCHI004685.m1.gene	3.23652e-10	0.680979	up
LITCHI018518.m1.gene	1.54714e-08	0.87716	up
LITCHI014729.m1.gene	2.19225e-07	-1.21606	down
LITCHI017066.m1.gene	0.0351455	-1.77472	down
LITCHI003310.m1.gene	0.00266804	0.771369	up
LITCHI008766.m1.gene	0.0194103	2.54024	up
LITCHI001662.m1.gene	4.05964e-05	-0.76794	down
LITCHI016333.m1.gene	4.02426e-29	0.842296	up
LITCHI016738.m7.gene	1.84029e-08	2.07064	up
LITCHI022675.m1.gene	0.00319383	0.862751	up
LITCHI027946.m1.gene	0.000861	0.858651	up
LITCHI026395.m3.gene	1.72748e-51	2.0751	up
LITCHI012745.m5.gene	0.00334792	-1.00036	down
LITCHI008825.m1.gene	2.20539e-09	4.39948	up
LITCHI027718.m1.gene	0.025482	-1.50673	down
LITCHI002137.m1.gene	7.80995e-06	0.722333	up
LITCHI015013.m1.gene	7.32238e-08	-0.631661	down
LITCHI009032.m1.gene	1.92288e-16	1.21393	up
LITCHI020264.m1.gene	1.01122e-23	0.875633	up
LITCHI010050.m1.gene	5.51684e-14	0.746557	up
LITCHI012311.m1.gene	2.46455e-07	-0.586063	down
LITCHI005703.m1.gene	0.0170482	-1.44227	down
LITCHI018683.m10.gene	0.0260561	1.13182	up
LITCHI027592.m1.gene	0.000365884	-0.903501	down
LITCHI013334.m1.gene	5.19493e-32	0.940567	up
LITCHI025302.m1.gene	0.000198445	0.70626	up
LITCHI003614.m1.gene	1.05739e-05	-0.668044	down
LITCHI002181.m10.gene	0.0194808	4.67549	up
Litchi_chinensis_newGene_3317	1.05385e-06	1.79131	up
LITCHI022092.m1.gene	7.87056e-05	-1.42989	down
LITCHI026989.m1.gene	1.55875e-05	0.858059	up
LITCHI017210.m1.gene	4.91968e-84	2.06761	up
LITCHI020329.m1.gene	2.53145e-19	-0.636045	down
LITCHI022463.m1.gene	0.00457602	1.24511	up
LITCHI005781.m1.gene	4.70095e-07	-0.978552	down
LITCHI018021.m5.gene	2.13635e-21	0.919335	up
LITCHI027733.m1.gene	2.61109e-12	2.62024	up
LITCHI021624.m1.gene	7.64394e-05	1.81795	up
LITCHI008841.m3.gene	0.0441724	-0.732221	down
LITCHI012927.m1.gene	1.70123e-07	-1.55272	down
Litchi_chinensis_newGene_5193	2.92194e-16	-1.87168	down
LITCHI022590.m1.gene	5.6901e-15	1.54989	up
LITCHI018926.m1.gene	7.30158e-11	2.61042	up
LITCHI021423.m1.gene	0.00214083	-0.623779	down
Litchi_chinensis_newGene_4455	1.85999e-07	-5.86823	down
LITCHI031115.m1.gene	9.09714e-14	-13.2802	down
LITCHI029394.m1.gene	0.00071297	0.856072	up
LITCHI027539.m1.gene	6.31602e-06	-0.735584	down
LITCHI001825.m1.gene	0.0383322	1.11485	up
LITCHI000636.m1.gene	4.746e-16	0.629615	up
LITCHI020876.m1.gene	6.40902e-05	1.07761	up
LITCHI005394.m1.gene	0.038427	-0.678712	down
LITCHI006364.m1.gene	6.28759e-157	2.43143	up
LITCHI011404.m1.gene	3.83987e-07	-0.950358	down
LITCHI023863.m8.gene	0.00251925	1.36968	up
LITCHI030503.m1.gene	0.000266362	-0.927534	down
LITCHI031304.m1.gene	0.000109325	-0.938568	down
Litchi_chinensis_newGene_476	0.00988354	3.43141	up
LITCHI007899.m1.gene	2.25611e-40	3.21371	up
LITCHI009494.m1.gene	0.0279442	-0.676345	down
LITCHI001436.m1.gene	2.64486e-31	1.49878	up
LITCHI021549.m1.gene	8.50671e-17	2.11208	up
LITCHI031105.m1.gene	6.67964e-06	-9.57071	down
LITCHI020944.m3.gene	0.000447359	0.593034	up
LITCHI029620.m1.gene	1.30475e-10	1.48762	up
LITCHI011862.m1.gene	0.00917067	-0.601099	down
LITCHI018602.m1.gene	0.00014576	0.813614	up
LITCHI016063.m1.gene	2.03361e-05	1.23429	up
LITCHI028649.m1.gene	0.00108044	-1.34778	down
LITCHI030456.m1.gene	1.38584e-05	-0.616908	down
LITCHI025118.m1.gene	6.85383e-21	0.763437	up
LITCHI028663.m1.gene	0.00326811	-1.03378	down
LITCHI004005.m1.gene	0.00010444	-0.635609	down
LITCHI016694.m1.gene	0.00846281	-0.710038	down
LITCHI012101.m4.gene	0.0149677	-4.55342	down
LITCHI031811.m1.gene	0.0378773	1.15267	up
LITCHI004063.m1.gene	4.87357e-08	-1.20846	down
LITCHI001495.m1.gene	1.85259e-06	0.606618	up
LITCHI014384.m1.gene	1.09745e-26	0.768843	up
LITCHI027084.m1.gene	4.8202e-15	0.717644	up
LITCHI010583.m1.gene	0.0400609	0.949536	up
LITCHI025932.m2.gene	0.0375417	-1.05583	down
LITCHI028982.m1.gene	0.000149793	1.06968	up
LITCHI030535.m1.gene	0.00812878	-2.08897	down
LITCHI028502.m1.gene	5.30537e-06	-0.853099	down
LITCHI026906.m1.gene	1.5111e-17	-0.645588	down
LITCHI006653.m1.gene	7.43531e-09	8.70861	up
LITCHI004787.m1.gene	3.89278e-08	-0.613981	down
LITCHI010476.m1.gene	8.79092e-07	0.759231	up
LITCHI009025.m1.gene	0.0161769	0.603177	up
LITCHI026684.m1.gene	8.23374e-15	1.16345	up
LITCHI017752.m1.gene	0.0160304	-0.989573	down
LITCHI030927.m2.gene	3.346e-23	-13.2104	down
LITCHI020194.m3.gene	9.20752e-11	-11.4275	down
LITCHI001405.m3.gene	0.00658098	-1.00997	down
LITCHI018291.m1.gene	7.64542e-271	5.98628	up
LITCHI003545.m2.gene	0.0330634	-1.20514	down
LITCHI004814.m1.gene	0.00101695	0.71522	up
LITCHI004109.m1.gene	0.0227942	-1.15777	down
LITCHI008823.m1.gene	0.0153897	-1.82017	down
LITCHI022179.m1.gene	7.55386e-21	1.81989	up
LITCHI008850.m1.gene	6.4241e-05	0.728589	up
LITCHI028276.m1.gene	9.84551e-12	0.734412	up
LITCHI005541.m1.gene	9.71111e-07	-1.04441	down
LITCHI013252.m1.gene	0.0302176	1.10141	up
LITCHI022611.m8.gene	1.15796e-11	-6.53686	down
LITCHI004879.m1.gene	1.22281e-10	1.09613	up
LITCHI018616.m1.gene	4.97669e-09	1.39301	up
LITCHI011394.m1.gene	4.43453e-09	0.749189	up
LITCHI016024.m1.gene	4.32544e-14	1.01723	up
LITCHI015346.m1.gene	0.0202617	0.618465	up
LITCHI004015.m1.gene	0.0274821	-1.17373	down
LITCHI014723.m1.gene	9.58226e-06	-1.19611	down
LITCHI019470.m1.gene	1.01242e-42	-0.929151	down
LITCHI020470.m1.gene	1.65866e-06	-0.812276	down
LITCHI021534.m1.gene	0.000104329	1.13444	up
LITCHI003710.m1.gene	8.57087e-10	-1.07462	down
LITCHI015504.m1.gene	1.47657e-19	0.839604	up
LITCHI016360.m1.gene	3.13348e-05	-1.03002	down
LITCHI010488.m1.gene	5.63772e-07	1.72521	up
LITCHI018648.m1.gene	6.37031e-13	1.94161	up
LITCHI003441.m1.gene	0.0408104	-0.78296	down
LITCHI010489.m1.gene	0.00911974	1.79881	up
LITCHI011069.m1.gene	1.2131e-06	2.25058	up
LITCHI012118.m1.gene	5.69551e-08	-0.764225	down
LITCHI017331.m1.gene	0.00860247	-0.655621	down
LITCHI031464.m1.gene	7.1758e-07	-1.01913	down
LITCHI022945.m1.gene	0.0395128	-1.1734	down
LITCHI020794.m1.gene	0.00385508	-1.24081	down
LITCHI029315.m1.gene	4.93897e-06	-1.01513	down
LITCHI022943.m1.gene	4.05964e-05	-1.14072	down
LITCHI005647.m1.gene	0.00261058	-0.608404	down
LITCHI015086.m1.gene	1.25906e-15	1.62647	up
LITCHI029310.m1.gene	9.93866e-05	-0.808128	down
LITCHI030941.m1.gene	3.68869e-12	-12.5363	down
LITCHI030333.m1.gene	0.00167796	-0.706764	down
LITCHI004962.m1.gene	0.00823051	-0.764504	down
LITCHI007239.m10.gene	2.49497e-05	-1.4562	down
LITCHI027862.m1.gene	6.65673e-05	0.761648	up
LITCHI030210.m1.gene	4.2564e-05	-1.22573	down
LITCHI009244.m1.gene	0.00327979	-0.664209	down
LITCHI007000.m1.gene	1.37055e-14	0.792366	up
LITCHI007420.m1.gene	0.0248034	1.65026	up
LITCHI008746.m1.gene	0.0459123	-1.12859	down
LITCHI010256.m1.gene	3.16935e-05	1.85381	up
LITCHI026914.m1.gene	6.08762e-09	0.785419	up
LITCHI018121.m1.gene	2.16942e-11	0.667062	up
LITCHI026296.m2.gene	0.00265678	-1.6446	down
LITCHI029103.m1.gene	0.00465237	0.962622	up
LITCHI010548.m1.gene	1.75462e-06	0.597227	up
LITCHI003389.m1.gene	0.000375612	-0.61344	down
LITCHI024568.m1.gene	0.0366466	1.12114	up
LITCHI015257.m1.gene	0.00461333	0.994625	up
LITCHI002181.m8.gene	0.0373732	-0.665201	down
LITCHI007903.m1.gene	3.32051e-25	3.55038	up
LITCHI008866.m1.gene	0.000791194	0.966602	up
LITCHI007657.m1.gene	1.39598e-15	-1.47329	down
LITCHI024579.m1.gene	0.0125764	0.633014	up
LITCHI012063.m1.gene	1.15591e-07	0.686633	up
LITCHI002527.m1.gene	3.09928e-08	3.14567	up
LITCHI029902.m1.gene	5.09535e-14	-1.73531	down
LITCHI003348.m4.gene	7.39768e-05	-1.40627	down
LITCHI029245.m1.gene	1.19886e-57	3.55209	up
LITCHI005513.m1.gene	9.88886e-10	2.16071	up
LITCHI024729.m1.gene	0.000117336	0.606346	up
LITCHI007391.m1.gene	0.0481104	0.660713	up
LITCHI012467.m1.gene	0.00264515	0.717484	up
LITCHI007602.m1.gene	0.0348887	-1.21188	down
LITCHI009348.m1.gene	3.56515e-33	2.09889	up
LITCHI024182.m1.gene	2.20512e-42	1.14352	up
LITCHI021382.m10.gene	0.00440962	0.701227	up
LITCHI003838.m1.gene	0.00222788	-0.899134	down
LITCHI021800.m1.gene	1.30026e-22	3.62938	up
LITCHI024741.m1.gene	0.000893863	0.590011	up
LITCHI020527.m2.gene	1.49842e-09	1.15609	up
LITCHI019839.m1.gene	4.44455e-17	10.8556	up
LITCHI014139.m1.gene	0.0326776	1.37295	up
LITCHI026971.m1.gene	0.00165375	1.02132	up
LITCHI018445.m3.gene	3.10683e-11	-11.2572	down
LITCHI019503.m1.gene	1.67196e-06	-1.41756	down
LITCHI021362.m1.gene	0.000203997	1.22464	up
LITCHI010909.m1.gene	2.38669e-09	0.774874	up
LITCHI029473.m1.gene	0.00020368	1.17616	up
LITCHI020450.m4.gene	1.21024e-07	1.86997	up
LITCHI023156.m1.gene	2.22208e-20	1.46623	up
LITCHI026220.m1.gene	1.76299e-21	0.875266	up
LITCHI019960.m3.gene	0.0245935	-0.651195	down
LITCHI010487.m1.gene	0.000464284	1.61769	up
LITCHI012936.m1.gene	6.45301e-07	-1.10823	down
LITCHI013330.m1.gene	0.000147724	1.07989	up
LITCHI020029.m1.gene	2.08482e-35	1.59988	up
LITCHI025785.m1.gene	8.24415e-05	2.18819	up
LITCHI022611.m1.gene	7.46063e-06	0.769077	up
LITCHI021418.m1.gene	0.000926207	1.00649	up
LITCHI015662.m1.gene	3.20961e-11	0.630699	up
LITCHI003322.m1.gene	0.00180861	0.79309	up
LITCHI004600.m1.gene	0.048045	-1.30764	down
LITCHI020916.m1.gene	1.38239e-05	1.0647	up
LITCHI001788.m7.gene	9.68664e-18	0.886515	up
Litchi_chinensis_newGene_5532	5.93925e-16	10.6037	up
LITCHI008346.m1.gene	0.0104246	0.994277	up
LITCHI022780.m10.gene	0.018076	-1.38868	down
LITCHI001328.m1.gene	0.000268779	0.839543	up
LITCHI007728.m1.gene	2.15475e-49	1.98642	up
LITCHI004424.m1.gene	1.36637e-05	1.05762	up
LITCHI014398.m1.gene	7.85908e-20	0.620766	up
LITCHI019348.m1.gene	0.00179046	0.82577	up
LITCHI006470.m1.gene	6.15525e-08	0.746166	up
LITCHI028705.m2.gene	6.08921e-15	4.45886	up
LITCHI023108.m1.gene	2.11068e-45	0.597213	up
LITCHI016562.m1.gene	7.55386e-21	1.15951	up
LITCHI001739.m1.gene	1.25674e-22	4.73699	up
LITCHI021135.m1.gene	0.000960076	0.877262	up
LITCHI015557.m1.gene	0.00224333	0.771793	up
LITCHI011729.m1.gene	2.27525e-05	1.93434	up
LITCHI008093.m1.gene	2.43693e-13	-0.990197	down
LITCHI029574.m1.gene	0.00212339	0.896648	up
LITCHI024390.m5.gene	0.0121236	-5.94435	down
LITCHI011562.m1.gene	2.83625e-32	-0.61175	down
LITCHI003660.m1.gene	0.00415648	-1.14271	down
LITCHI003640.m1.gene	0.000205352	0.648148	up
LITCHI021832.m1.gene	0.00208613	-1.96046	down
LITCHI006354.m1.gene	3.39093e-05	0.982987	up
LITCHI021463.m1.gene	6.34058e-21	-11.8284	down
LITCHI013622.m1.gene	1.97785e-11	-0.599918	down
LITCHI023376.m1.gene	0.00228624	-1.99192	down
LITCHI008367.m3.gene	6.95045e-12	15.4788	up
LITCHI012385.m1.gene	0.0170836	-0.652418	down
LITCHI002402.m1.gene	0.00591325	0.787372	up
LITCHI004508.m1.gene	0.0208358	-0.894729	down
LITCHI022586.m1.gene	0.00196549	-1.30138	down
LITCHI000717.m1.gene	0.0133086	1.89236	up
LITCHI021888.m1.gene	0.008481	-1.44712	down
LITCHI020246.m1.gene	0.0352645	-0.845522	down
LITCHI021180.m1.gene	0.00603481	-0.7233	down
LITCHI010238.m1.gene	0.000981991	0.810012	up
LITCHI004839.m1.gene	0.000135726	0.65247	up
LITCHI021934.m1.gene	0.00878578	0.596929	up
LITCHI025933.m1.gene	0.0213982	-0.637769	down
LITCHI014338.m1.gene	0.00922741	-0.781405	down
LITCHI029336.m1.gene	1.90821e-06	-0.895591	down
LITCHI020836.m1.gene	0.00798529	1.00127	up
LITCHI012384.m1.gene	0.020551	-0.701353	down
LITCHI003501.m1.gene	1.02689e-10	-1.88389	down
LITCHI006487.m5.gene	4.13648e-05	0.664312	up
LITCHI025919.m1.gene	0.0264018	0.589834	up
LITCHI008450.m1.gene	0.000155315	1.14398	up
LITCHI004662.m1.gene	1.87499e-28	0.923506	up
LITCHI024119.m1.gene	0.0440407	-0.661132	down
LITCHI010723.m1.gene	2.70392e-07	1.57689	up
LITCHI019193.m1.gene	0.000656131	-1.10981	down
LITCHI023023.m1.gene	0.000771561	1.18992	up
LITCHI003545.m5.gene	9.63417e-11	3.28732	up
LITCHI016928.m1.gene	1.10081e-08	-0.821815	down
LITCHI020928.m1.gene	5.00003e-05	0.94787	up
LITCHI021028.m1.gene	0.0332684	0.703012	up
LITCHI009398.m1.gene	1.39037e-11	-1.02561	down
LITCHI015498.m1.gene	1.32306e-34	2.29269	up
LITCHI010928.m1.gene	0.0270396	-0.62593	down
LITCHI029441.m1.gene	1.80047e-06	-1.97387	down
LITCHI014826.m1.gene	0.0317096	-1.40546	down
LITCHI001774.m13.gene	1.70993e-05	-6.86337	down
LITCHI006317.m1.gene	0.0382153	0.94107	up
LITCHI021517.m1.gene	0.0463458	-0.879339	down
LITCHI024191.m1.gene	2.47855e-11	-0.588572	down
LITCHI013344.m1.gene	0.00501471	-1.20863	down
LITCHI022938.m1.gene	1.15755e-24	0.869445	up
LITCHI000135.m1.gene	5.37734e-06	-1.11975	down
LITCHI022203.m1.gene	1.79888e-17	1.18753	up
Litchi_chinensis_newGene_516	0.00144044	-1.28125	down
LITCHI020129.m1.gene	0.000582595	1.19297	up
LITCHI002564.m1.gene	0.00732849	-0.734247	down
LITCHI029304.m1.gene	5.81837e-05	-1.1991	down
LITCHI009991.m6.gene	0.00101734	3.00877	up
LITCHI009576.m1.gene	0.000209887	0.613172	up
LITCHI015395.m2.gene	8.12744e-07	-2.29384	down
LITCHI016722.m1.gene	1.90187e-09	0.913146	up
LITCHI021463.m2.gene	0.00838376	3.74682	up
LITCHI026663.m1.gene	0.000124457	-0.592001	down
LITCHI024752.m1.gene	0.0165092	-1.10918	down
LITCHI002682.m1.gene	0.00627471	-0.882036	down
LITCHI012483.m1.gene	1.51141e-17	1.4908	up
LITCHI007060.m1.gene	4.87357e-08	-0.734418	down
LITCHI022746.m1.gene	2.64241e-38	-0.934883	down
LITCHI025046.m3.gene	0.0295881	-0.684583	down
LITCHI027716.m1.gene	0.0167641	-1.15546	down
LITCHI015330.m1.gene	7.78506e-12	0.613114	up
LITCHI027956.m1.gene	5.8116e-05	1.54723	up
LITCHI024428.m1.gene	1.65083e-75	-1.69952	down
LITCHI030108.m1.gene	0.00112517	1.47077	up
LITCHI011017.m1.gene	0.000187716	2.32706	up
LITCHI023282.m1.gene	2.52916e-10	3.2647	up
LITCHI021494.m1.gene	6.70268e-09	3.72974	up
LITCHI004327.m1.gene	0.0270622	-0.648155	down
LITCHI011882.m1.gene	0.0041536	-0.765563	down
LITCHI027705.m1.gene	7.26247e-06	-1.87042	down
LITCHI014625.m1.gene	6.15369e-100	3.92097	up
LITCHI010560.m1.gene	0.0358552	1.15841	up
LITCHI008175.m1.gene	0.00288285	-0.975534	down
LITCHI000894.m1.gene	3.42053e-24	2.03303	up
LITCHI026165.m1.gene	1.80642e-23	0.764257	up
LITCHI002275.m1.gene	0.0189879	-0.627274	down
LITCHI024219.m6.gene	0.00137079	0.726182	up
Litchi_chinensis_newGene_8092	0.00762857	-1.34556	down
LITCHI023271.m1.gene	0.0318608	-0.762039	down
LITCHI015351.m1.gene	0.0293889	-1.27899	down
LITCHI017171.m1.gene	7.57888e-10	1.63149	up
LITCHI025510.m1.gene	1.10081e-05	0.717561	up
LITCHI029291.m1.gene	4.53378e-32	-0.806949	down
LITCHI023938.m1.gene	0.000152398	0.884966	up
LITCHI015837.m1.gene	0.00377099	0.606413	up
Litchi_chinensis_newGene_2210	2.36335e-05	-1.03338	down
LITCHI023026.m1.gene	2.8929e-51	3.27666	up
LITCHI016414.m1.gene	0.0265074	1.06808	up
LITCHI020683.m1.gene	4.56122e-06	0.607874	up
LITCHI015379.m1.gene	0.000561453	2.29494	up
LITCHI005838.m2.gene	0.00376474	1.09806	up
LITCHI004339.m1.gene	0.00266753	2.09338	up
LITCHI027444.m1.gene	2.51772e-05	-1.08416	down
LITCHI018208.m1.gene	0.00289187	3.21543	up
LITCHI007196.m1.gene	9.40038e-06	1.27762	up
LITCHI014755.m1.gene	1.72124e-05	0.681324	up
Litchi_chinensis_newGene_1308	4.07224e-08	-0.853826	down
LITCHI018837.m1.gene	1.50781e-05	0.59975	up
LITCHI018696.m1.gene	1.34851e-26	3.60976	up
LITCHI021696.m1.gene	1.16838e-05	0.757615	up
LITCHI025729.m1.gene	1.77809e-14	-0.767999	down
LITCHI030638.m1.gene	0.0219995	1.61996	up
LITCHI026662.m1.gene	0.0346694	-0.719231	down
LITCHI010639.m1.gene	0.0134452	-1.15897	down
LITCHI027577.m1.gene	5.48016e-07	-2.76531	down
LITCHI004016.m1.gene	2.76239e-05	-1.11362	down
LITCHI001514.m1.gene	7.03002e-23	0.59249	up
LITCHI017953.m1.gene	6.90437e-05	0.838218	up
LITCHI019572.m1.gene	8.52227e-07	1.15651	up
LITCHI023843.m1.gene	0.0149558	-1.13666	down
LITCHI002792.m1.gene	4.96543e-15	1.20726	up
LITCHI018055.m1.gene	4.75412e-05	-1.93907	down
LITCHI004943.m1.gene	2.11307e-12	-0.709647	down
Litchi_chinensis_newGene_7694	0.00278578	-2.74623	down
LITCHI024053.m2.gene	0.000111764	1.4883	up
LITCHI009298.m1.gene	3.89395e-05	-1.24044	down
LITCHI013306.m1.gene	0.000741919	-0.796419	down
LITCHI020716.m1.gene	0.00103324	-0.652522	down
LITCHI006686.m1.gene	9.78684e-13	2.65319	up
LITCHI010746.m1.gene	4.11195e-12	0.624685	up
LITCHI024662.m1.gene	0.0323016	0.655568	up
LITCHI004383.m1.gene	6.88791e-06	-0.643038	down
LITCHI011584.m1.gene	0.0261471	0.693098	up
LITCHI015726.m3.gene	0.0292428	-0.658277	down
LITCHI018684.m6.gene	0.0365881	1.86493	up
LITCHI025506.m1.gene	0.000673525	-2.31537	down
LITCHI030220.m1.gene	5.85005e-10	0.659889	up
LITCHI007218.m1.gene	1.32994e-10	0.665238	up
LITCHI014771.m7.gene	4.49365e-06	-2.41474	down
LITCHI030142.m1.gene	8.04409e-27	1.33871	up
LITCHI001397.m1.gene	0.0282623	0.648337	up
LITCHI019951.m1.gene	1.58648e-07	2.84709	up
LITCHI019109.m1.gene	9.69727e-06	4.02275	up
LITCHI004878.m1.gene	2.49421e-40	1.07019	up
LITCHI020761.m1.gene	2.16342e-13	2.47387	up
LITCHI019931.m1.gene	0.00492916	1.56393	up
LITCHI023509.m1.gene	0.0177118	0.874181	up
LITCHI011287.m1.gene	2.1075e-14	1.06775	up
LITCHI001439.m2.gene	0.000600398	-1.07295	down
LITCHI010129.m1.gene	7.12151e-05	1.18665	up
LITCHI017609.m1.gene	1.11686e-12	2.65849	up
LITCHI023020.m1.gene	1.39538e-08	1.79321	up
LITCHI008924.m1.gene	5.40129e-05	-0.844219	down
LITCHI002439.m1.gene	0.00673585	1.32585	up
LITCHI006766.m1.gene	1.04834e-18	0.836957	up
LITCHI017962.m1.gene	0.000801165	-2.06929	down
LITCHI025706.m1.gene	7.57804e-05	0.890171	up
LITCHI005283.m4.gene	1.15311e-10	-9.27664	down
LITCHI022178.m1.gene	4.01593e-20	0.95832	up
LITCHI006963.m1.gene	9.09714e-14	0.623571	up
LITCHI030056.m1.gene	0.000994863	-0.921522	down
LITCHI021265.m1.gene	0.0485826	-1.75588	down
LITCHI030455.m1.gene	0.0156756	-0.737838	down
LITCHI010048.m1.gene	0.000934213	0.852692	up
LITCHI012839.m1.gene	0.000397897	1.27445	up
LITCHI022230.m1.gene	0.0203322	0.769491	up
LITCHI021718.m1.gene	6.92996e-07	0.685033	up
LITCHI014720.m1.gene	0.000368095	0.793469	up
LITCHI016398.m1.gene	1.48985e-05	-1.44331	down
LITCHI021780.m1.gene	2.06005e-95	3.62905	up
LITCHI021839.m1.gene	1.33741e-24	0.896044	up
LITCHI022881.m1.gene	3.85202e-09	2.62007	up
LITCHI027867.m1.gene	6.41959e-10	1.40101	up
LITCHI027835.m1.gene	8.58388e-12	-0.662499	down
Litchi_chinensis_newGene_7075	6.8351e-23	-12.3296	down
LITCHI027582.m1.gene	0.0348271	0.675805	up
LITCHI021623.m1.gene	0.0106774	0.839281	up
LITCHI015348.m1.gene	0.0439175	0.664297	up
LITCHI001488.m1.gene	1.8499e-06	0.743423	up
LITCHI008874.m1.gene	0.00160154	0.810147	up
LITCHI023155.m1.gene	3.06595e-14	1.4233	up
LITCHI017041.m3.gene	0.00426091	-1.16816	down
LITCHI014365.m2.gene	0.00343262	1.67156	up
LITCHI022427.m1.gene	0.00507585	0.817302	up
LITCHI020315.m1.gene	0.0157934	1.41607	up
LITCHI021745.m1.gene	0.00272338	-1.20204	down
LITCHI024068.m1.gene	0.00328193	-0.758532	down
LITCHI004367.m1.gene	7.02947e-05	-0.754848	down
LITCHI006661.m1.gene	6.53369e-47	0.996047	up
LITCHI022907.m1.gene	2.63639e-34	1.22498	up
LITCHI024182.m3.gene	3.8365e-117	3.10977	up
LITCHI021102.m1.gene	1.45682e-21	-0.618211	down
LITCHI019005.m2.gene	0.0168268	1.918	up
LITCHI023038.m1.gene	0.0331122	-0.807282	down
LITCHI012093.m1.gene	4.62586e-08	0.724524	up
LITCHI023238.m1.gene	0.039982	-0.896843	down
LITCHI020514.m1.gene	0.00188245	-0.752952	down
LITCHI016845.m1.gene	0.000723162	0.670113	up
LITCHI011204.m1.gene	0.00315829	0.897552	up
LITCHI030830.m1.gene	0.00622204	-1.19711	down
LITCHI001586.m1.gene	4.83618e-18	1.29668	up
LITCHI025352.m1.gene	3.26807e-66	1.62119	up
LITCHI006733.m1.gene	4.20214e-12	0.613834	up
LITCHI027994.m10.gene	0.00138026	2.64929	up
LITCHI026316.m1.gene	0.000173697	-1.18721	down
LITCHI001952.m1.gene	0.000369723	0.890111	up
LITCHI005664.m1.gene	0.0014921	-0.825275	down
LITCHI014930.m1.gene	0.0358634	0.797609	up
LITCHI003230.m1.gene	3.21433e-10	0.695497	up
LITCHI004991.m1.gene	0.000773288	-1.1744	down
LITCHI011940.m1.gene	0.00150776	-0.627552	down
LITCHI025200.m1.gene	0.00217828	0.619387	up
LITCHI010552.m1.gene	0.00102976	0.818335	up
LITCHI009574.m1.gene	2.74006e-07	0.842267	up
LITCHI009568.m1.gene	0.000121851	-0.699813	down
Litchi_chinensis_newGene_4935	0.0304723	0.968767	up
LITCHI020680.m1.gene	0.00674227	-0.935566	down
LITCHI024070.m1.gene	3.61033e-21	2.29583	up
LITCHI024385.m1.gene	0.000308662	0.934072	up
LITCHI020211.m1.gene	0.0386478	0.677205	up
LITCHI019026.m6.gene	0.000625865	-0.922088	down
LITCHI021841.m1.gene	2.55959e-27	0.963411	up
LITCHI030761.m1.gene	3.25779e-32	1.2873	up
LITCHI014480.m1.gene	2.87901e-14	-0.744874	down
LITCHI018244.m1.gene	5.12794e-07	-1.55806	down
LITCHI002939.m1.gene	4.14325e-12	0.625213	up
LITCHI003656.m1.gene	0.0145143	4.10975	up
LITCHI022176.m1.gene	1.76299e-21	1.13065	up
LITCHI018445.m1.gene	0.023819	0.64282	up
LITCHI019645.m1.gene	5.29085e-07	1.16868	up
LITCHI025638.m1.gene	4.92417e-14	1.24934	up
LITCHI028949.m1.gene	2.31641e-05	2.41186	up
LITCHI025724.m1.gene	0.00939457	2.45541	up
LITCHI025161.m1.gene	0	3.38783	up
LITCHI016738.m1.gene	1.28996e-07	-1.88709	down
LITCHI022184.m1.gene	0.00976345	-1.55546	down
LITCHI030125.m1.gene	6.50583e-29	-1.12789	down
Litchi_chinensis_newGene_7852	0.0089987	1.12329	up
LITCHI011665.m1.gene	0.0012732	0.708291	up
LITCHI024526.m1.gene	2.73698e-15	1.13259	up
LITCHI024511.m1.gene	3.76835e-07	0.668633	up
LITCHI009436.m1.gene	4.35599e-19	-0.865836	down
LITCHI014268.m3.gene	0.000451687	0.74289	up
LITCHI009933.m1.gene	0.000598209	1.20746	up
LITCHI026368.m1.gene	3.19525e-165	-2.37936	down
LITCHI026300.m1.gene	0.00919503	1.17555	up
LITCHI016968.m1.gene	1.02286e-11	9.45191	up
LITCHI010823.m1.gene	0.0201608	-0.739319	down
LITCHI018238.m1.gene	7.82781e-09	1.06484	up
LITCHI007653.m5.gene	2.04744e-06	-3.81402	down
LITCHI007199.m1.gene	0.000116553	1.63776	up
LITCHI026297.m1.gene	0.0354138	0.706611	up
LITCHI006033.m1.gene	2.54692e-05	-0.862575	down
LITCHI026860.m1.gene	0.0148605	1.28998	up
LITCHI010736.m1.gene	0.00685878	-0.79322	down
LITCHI002984.m1.gene	0.0407982	0.699377	up
LITCHI009482.m3.gene	7.11099e-26	-5.96892	down
LITCHI026502.m1.gene	5.02458e-05	-1.17403	down
LITCHI010049.m1.gene	0.00167669	0.621051	up
LITCHI027033.m1.gene	0.00340251	0.629282	up
LITCHI025275.m1.gene	4.63021e-05	0.645006	up
LITCHI017995.m1.gene	1.40506e-05	2.08102	up
LITCHI030600.m1.gene	0.0440651	0.916334	up
LITCHI006903.m1.gene	5.557e-14	-0.725444	down
LITCHI009274.m1.gene	0.000518492	0.70127	up
LITCHI026384.m1.gene	5.45312e-05	1.27463	up
LITCHI017491.m2.gene	0.000688279	0.79672	up
LITCHI007059.m1.gene	3.10683e-11	0.739341	up
LITCHI003762.m1.gene	0.00128512	-0.590407	down
LITCHI024184.m1.gene	1.37162e-05	3.46366	up
LITCHI015500.m1.gene	5.21791e-67	1.99082	up
LITCHI007958.m1.gene	0.0286738	-0.918963	down
LITCHI006542.m1.gene	0.0166282	-0.737653	down
LITCHI028392.m1.gene	0.0308384	0.733156	up
LITCHI005283.m10.gene	0.0034214	0.765714	up
LITCHI015377.m1.gene	0.0288375	0.856822	up
LITCHI017968.m1.gene	0.0150694	-0.894591	down
LITCHI030113.m1.gene	4.16924e-20	1.46065	up
LITCHI015486.m1.gene	7.9846e-06	1.955	up
LITCHI003366.m1.gene	6.76546e-114	1.29558	up
LITCHI025147.m1.gene	0.0245882	0.690766	up
LITCHI023841.m1.gene	0.00183139	-0.968373	down
LITCHI021801.m1.gene	9.09714e-14	0.777871	up
LITCHI030524.m1.gene	0.00392467	-1.08059	down
LITCHI027925.m1.gene	0.0268093	0.601232	up
LITCHI024969.m1.gene	1.76299e-21	-0.653827	down
LITCHI016696.m1.gene	7.38892e-05	-0.644984	down
LITCHI022184.m2.gene	3.40346e-16	4.06783	up
LITCHI019107.m1.gene	0.0331653	1.23964	up
LITCHI029751.m1.gene	0.0158692	2.63149	up
LITCHI019464.m1.gene	0.0351115	-0.58998	down
LITCHI023360.m5.gene	0.0426125	-0.804521	down
LITCHI015367.m1.gene	0.0189262	-0.606113	down
LITCHI026910.m1.gene	0.0143754	0.630999	up
LITCHI027519.m1.gene	0.00492916	-0.707146	down
LITCHI019797.m2.gene	0.0309032	-1.47051	down
LITCHI012015.m1.gene	0.0112377	1.13405	up
LITCHI010282.m1.gene	0.000360547	-1.65645	down
LITCHI006041.m1.gene	0.011912	1.15467	up
LITCHI021463.m19.gene	0.000911291	-1.13864	down
LITCHI029184.m1.gene	0.000169561	0.9489	up
LITCHI015383.m1.gene	5.63773e-07	2.60544	up
LITCHI014961.m1.gene	9.81272e-25	0.70576	up
LITCHI022931.m1.gene	0.00254842	-1.11211	down
LITCHI022012.m1.gene	6.70268e-09	8.70818	up
Litchi_chinensis_newGene_3195	0.0318608	-1.6699	down
LITCHI007907.m2.gene	0.0357798	-0.685124	down
LITCHI020802.m1.gene	0.000936107	0.771931	up
LITCHI021417.m1.gene	3.71626e-23	-1.19526	down
LITCHI001832.m1.gene	0.0071888	1.09933	up
LITCHI029757.m1.gene	1.0701e-05	-0.832864	down
LITCHI003886.m1.gene	0.000556676	1.04552	up
LITCHI030630.m1.gene	0.0262784	-1.03139	down
LITCHI030585.m1.gene	5.41034e-05	0.779734	up
LITCHI003719.m1.gene	5.22021e-11	0.703997	up
LITCHI006416.m1.gene	0.000337299	-1.5647	down
LITCHI006877.m3.gene	0.0369477	-0.789978	down
LITCHI003807.m1.gene	6.00758e-71	4.81931	up
LITCHI010092.m1.gene	0.0354652	-3.3309	down
LITCHI016780.m3.gene	0.00387413	-0.808084	down
LITCHI027926.m1.gene	1.93594e-17	0.588369	up
LITCHI017871.m2.gene	8.01891e-10	1.75498	up
LITCHI002634.m1.gene	0.0498887	0.614994	up
LITCHI005044.m1.gene	0.00363212	-0.740796	down
LITCHI018491.m1.gene	0.00117317	0.585503	up
LITCHI022478.m1.gene	0.0117289	-1.1844	down
LITCHI012539.m2.gene	0.0036079	-0.613837	down
LITCHI015879.m1.gene	0.0376843	1.33986	up
LITCHI019001.m1.gene	3.08405e-12	-0.594034	down
LITCHI010542.m1.gene	3.86823e-26	-0.631104	down
LITCHI030518.m1.gene	0.0433052	-1.57282	down
LITCHI005876.m1.gene	6.02811e-07	3.19808	up
LITCHI031063.m1.gene	3.51802e-12	-12.483	down
LITCHI030412.m1.gene	5.46749e-05	-1.13519	down
LITCHI006893.m1.gene	2.58946e-05	-2.16089	down
LITCHI028939.m1.gene	1.94345e-07	-0.68655	down
LITCHI004812.m1.gene	2.07732e-08	1.50618	up
LITCHI027682.m1.gene	0.00602035	-1.74026	down
LITCHI001932.m1.gene	0.0286682	-1.25491	down
LITCHI018044.m1.gene	4.36769e-05	-1.68433	down
LITCHI001339.m1.gene	2.30264e-06	0.635484	up
LITCHI030429.m1.gene	2.02753e-05	-0.908823	down
LITCHI005573.m1.gene	1.5667e-21	12.2118	up
LITCHI001132.m1.gene	3.7652e-06	1.59712	up
LITCHI015285.m1.gene	0.000170298	-1.09045	down
LITCHI017827.m3.gene	0.0347327	2.04795	up
LITCHI007120.m1.gene	4.59583e-08	-1.07229	down
LITCHI027781.m1.gene	3.77302e-06	1.17974	up
LITCHI030580.m1.gene	1.373e-09	0.800785	up
LITCHI017259.m1.gene	0.00124947	0.953494	up
LITCHI018804.m1.gene	3.60069e-23	0.741641	up
LITCHI008994.m1.gene	7.99714e-05	-0.615913	down
LITCHI031448.m1.gene	3.68184e-08	0.684178	up
LITCHI016426.m1.gene	0.0407982	1.3244	up
LITCHI013258.m1.gene	7.12199e-14	0.699109	up
LITCHI031441.m4.gene	0.0112806	0.595155	up
LITCHI020370.m11.gene	4.03545e-19	0.701524	up
LITCHI012511.m4.gene	0.0158758	1.52178	up
LITCHI025973.m1.gene	0.00395973	0.644102	up
LITCHI017277.m1.gene	0.00257155	-0.738428	down
LITCHI016368.m1.gene	3.62649e-05	-1.72494	down
LITCHI002045.m1.gene	0.0409182	0.756666	up
LITCHI029307.m1.gene	2.20393e-15	10.377	up
LITCHI001512.m1.gene	0.00234494	2.3241	up
LITCHI030556.m1.gene	2.58452e-05	-0.883983	down
LITCHI005182.m1.gene	4.12676e-05	0.614111	up
LITCHI014383.m1.gene	0.00693273	-0.634419	down
LITCHI029670.m1.gene	1.28845e-77	1.02955	up
LITCHI001542.m1.gene	1.6087e-05	0.969542	up
LITCHI026836.m1.gene	0.000430328	0.719035	up
LITCHI012773.m1.gene	1.36809e-06	0.855869	up
LITCHI025775.m1.gene	1.26466e-22	0.842313	up
LITCHI006594.m1.gene	3.86003e-07	-0.751123	down
LITCHI006894.m1.gene	0.00761797	-1.82998	down
LITCHI024675.m1.gene	3.86227e-10	1.04213	up
LITCHI011179.m1.gene	0.00112717	-1.59046	down
LITCHI025287.m1.gene	0.000125259	-1.65371	down
LITCHI008136.m1.gene	0.000513178	-1.23519	down
LITCHI005675.m1.gene	0.00440004	-0.809507	down
LITCHI009008.m1.gene	0.0120246	1.40313	up
LITCHI022696.m1.gene	4.69577e-07	3.0124	up
LITCHI023417.m1.gene	7.826e-12	0.802436	up
LITCHI003689.m1.gene	0.000123555	0.753584	up
LITCHI014444.m1.gene	3.93406e-23	0.813617	up
Litchi_chinensis_newGene_3146	0.0348887	0.880856	up
LITCHI012316.m1.gene	1.95762e-05	0.590646	up
LITCHI000055.m1.gene	7.03455e-18	-0.782358	down
LITCHI029072.m1.gene	1.2753e-11	-2.62869	down
LITCHI001811.m1.gene	0.0025159	-1.21994	down
LITCHI018545.m10.gene	0.000378862	-1.65053	down
LITCHI015180.m1.gene	2.19498e-16	0.613571	up
LITCHI008370.m2.gene	1.38309e-05	1.13121	up
LITCHI002951.m1.gene	1.17438e-13	2.00698	up
LITCHI013185.m1.gene	5.70554e-16	-10.6229	down
LITCHI003659.m1.gene	1.28128e-05	1.26575	up
LITCHI010719.m1.gene	0.00125153	0.71064	up
LITCHI015378.m1.gene	2.21988e-06	4.51406	up
LITCHI001967.m1.gene	0.00378303	-1.73024	down
LITCHI001382.m1.gene	1.66274e-47	5.26534	up
LITCHI025281.m1.gene	1.70542e-40	2.82294	up
LITCHI022495.m1.gene	0.0431669	0.592122	up
LITCHI017529.m1.gene	4.27274e-16	1.61656	up
LITCHI024942.m1.gene	0.0367469	0.740433	up
LITCHI006468.m1.gene	0.0155406	0.617289	up
LITCHI019131.m1.gene	7.00893e-13	0.739235	up
LITCHI019609.m1.gene	0.00366333	0.593543	up
Litchi_chinensis_newGene_6361	3.40413e-05	1.00265	up
LITCHI008760.m1.gene	0.032229	-1.23307	down
LITCHI009287.m1.gene	0.0126616	-0.704347	down
LITCHI024090.m1.gene	2.03208e-135	2.63678	up
LITCHI019619.m4.gene	0.00755308	2.91275	up
LITCHI009151.m1.gene	1.45845e-96	1.79204	up
LITCHI017106.m1.gene	0.00127355	0.863408	up
LITCHI011598.m5.gene	0.00177593	0.723711	up
LITCHI024296.m1.gene	0.0464031	0.919866	up
LITCHI002929.m1.gene	0.00475811	0.593284	up
LITCHI004603.m1.gene	0.00025683	-1.79808	down
LITCHI021094.m1.gene	7.23188e-81	-2.08074	down
LITCHI028583.m1.gene	3.10683e-11	0.700392	up
LITCHI029019.m1.gene	0.000133662	-0.932925	down
LITCHI023089.m1.gene	0.00157542	1.15596	up
LITCHI021977.m1.gene	0.000400512	1.18686	up
Litchi_chinensis_newGene_7734	0.00039833	-1.25709	down
LITCHI013265.m1.gene	0.00453429	0.77766	up
LITCHI003507.m1.gene	0.00672593	-0.944615	down
LITCHI019384.m1.gene	0.0144954	-0.607732	down
LITCHI017429.m1.gene	0.00285631	-1.07004	down
LITCHI019196.m1.gene	0.000940528	0.762053	up
LITCHI016981.m1.gene	0.0060966	0.70755	up
LITCHI025666.m1.gene	5.70959e-11	0.759215	up
LITCHI002756.m1.gene	1.68883e-19	-0.69752	down
LITCHI016273.m1.gene	9.43136e-07	0.800947	up
LITCHI020795.m1.gene	2.78723e-35	1.28757	up
LITCHI009073.m1.gene	8.18128e-08	1.08721	up
LITCHI013516.m1.gene	0.0153661	-0.821856	down
LITCHI022733.m1.gene	0.0137229	1.2052	up
LITCHI016163.m1.gene	0.000128786	-1.71573	down
LITCHI013185.m2.gene	0.000111059	1.78932	up
LITCHI001540.m1.gene	1.52901e-06	-1.43173	down
LITCHI004606.m1.gene	0.0150444	-1.50075	down
LITCHI016848.m1.gene	5.18428e-13	1.04017	up
LITCHI005872.m1.gene	0.000313049	1.94491	up
LITCHI028641.m1.gene	0.000926207	0.662456	up
LITCHI017252.m1.gene	1.8633e-36	0.860913	up
LITCHI023016.m1.gene	0.00083081	1.10855	up
LITCHI005655.m1.gene	1.2071e-08	0.733315	up
LITCHI020901.m1.gene	0.0335017	0.639514	up
LITCHI005555.m1.gene	0.0314399	0.953854	up
LITCHI020807.m1.gene	0.00431146	-0.783988	down
LITCHI024968.m1.gene	0.000145638	-0.911763	down
LITCHI008692.m1.gene	0.000689318	1.05954	up
LITCHI003388.m1.gene	5.94362e-09	-1.34396	down
LITCHI003672.m1.gene	2.99308e-22	-1.0785	down
LITCHI030762.m4.gene	0.00333392	1.0641	up
LITCHI011976.m1.gene	2.18271e-15	-0.840066	down
LITCHI014231.m1.gene	0.00512737	-0.663463	down
LITCHI004947.m1.gene	0.0259801	-0.641775	down
LITCHI001136.m1.gene	8.92623e-08	2.39218	up
LITCHI008773.m1.gene	4.8608e-13	-1.92546	down
LITCHI029066.m1.gene	2.72174e-05	1.20561	up
LITCHI006363.m1.gene	5.78345e-70	3.19839	up
LITCHI028242.m1.gene	0.0218297	0.627087	up
LITCHI008776.m1.gene	6.08655e-69	1.38723	up
LITCHI021523.m1.gene	0.000717258	-0.978803	down
LITCHI001210.m1.gene	2.03328e-19	2.53442	up
LITCHI021926.m4.gene	7.72105e-05	2.74268	up
LITCHI022876.m1.gene	1.11187e-05	0.601733	up
LITCHI026777.m1.gene	0.0112806	0.855351	up
Litchi_chinensis_newGene_508	6.88541e-06	1.25899	up
LITCHI026152.m1.gene	0.0350528	-0.657756	down
LITCHI003402.m1.gene	2.80515e-93	1.30415	up
LITCHI031550.m1.gene	0.0185428	-1.61036	down
LITCHI029075.m1.gene	3.33028e-47	1.10462	up
LITCHI002966.m1.gene	0.000347041	-1.5544	down
LITCHI018231.m1.gene	7.69704e-15	1.79965	up
LITCHI027837.m2.gene	0.00568983	0.869003	up
LITCHI021848.m1.gene	9.06401e-51	1.32606	up
LITCHI015748.m1.gene	0.00040907	-0.948577	down
LITCHI006624.m1.gene	0.000241459	0.658754	up
LITCHI029231.m1.gene	0.00717139	3.86917	up
LITCHI008114.m1.gene	9.07842e-16	2.92569	up
LITCHI004746.m1.gene	2.67802e-08	1.63985	up
LITCHI010432.m1.gene	3.42053e-24	1.19434	up
LITCHI005329.m1.gene	0.0136896	0.796006	up
LITCHI018465.m1.gene	6.68036e-07	0.756391	up
LITCHI028098.m1.gene	0.00213807	1.07969	up
LITCHI002829.m1.gene	9.49551e-05	1.34534	up
LITCHI005209.m1.gene	0.00603276	1.11518	up
LITCHI023576.m6.gene	2.59427e-06	-1.01304	down
LITCHI003987.m1.gene	0.00192061	-1.21824	down
LITCHI026324.m1.gene	1.05886e-12	-0.761762	down
LITCHI006629.m1.gene	0.0163042	-2.07906	down
LITCHI000839.m1.gene	0.0469112	-0.721367	down
LITCHI023012.m1.gene	6.53683e-08	3.10175	up
Litchi_chinensis_newGene_5600	0.000238526	-1.94723	down
LITCHI024395.m1.gene	9.48613e-10	1.53497	up
Litchi_chinensis_newGene_2071	9.9126e-05	-1.18212	down
LITCHI027349.m1.gene	0.0404196	-0.693951	down
LITCHI004244.m2.gene	0.0064096	1.50956	up
LITCHI028774.m1.gene	5.04357e-24	1.35238	up
LITCHI017254.m1.gene	0.0285213	-0.641955	down
LITCHI020906.m1.gene	2.65588e-71	1.69132	up
LITCHI006968.m1.gene	2.2922e-28	1.4975	up
LITCHI008476.m1.gene	3.40413e-05	-0.740112	down
LITCHI022745.m1.gene	0.00099388	-0.867747	down
LITCHI015684.m1.gene	7.02947e-05	-0.860624	down
LITCHI001824.m2.gene	0.0360865	-0.891131	down
LITCHI005390.m1.gene	4.23092e-06	1.82865	up
LITCHI015148.m1.gene	1.9327e-06	0.751218	up
LITCHI021068.m1.gene	0.0160729	-2.01334	down
LITCHI021469.m1.gene	0.00116894	-1.86564	down
LITCHI018541.m1.gene	0.0235333	1.20406	up
LITCHI015503.m1.gene	1.71259e-10	1.28972	up
LITCHI000648.m1.gene	0.000146585	0.665125	up
LITCHI005830.m1.gene	6.27306e-05	-0.965031	down
Litchi_chinensis_newGene_5344	1.95938e-06	-0.618054	down
LITCHI000999.m1.gene	3.84085e-05	-0.731822	down
LITCHI011872.m1.gene	0.0153661	-0.697923	down
LITCHI004876.m1.gene	0.000474338	0.698187	up
LITCHI015374.m1.gene	3.91958e-05	1.90208	up
LITCHI028426.m2.gene	0.0021814	3.50493	up
LITCHI004564.m4.gene	0.00129962	-0.775134	down
LITCHI026635.m10.gene	0.0250066	-1.08532	down
LITCHI018600.m1.gene	1.47804e-40	1.71658	up
LITCHI013802.m1.gene	0.00721025	-2.0061	down
LITCHI003891.m1.gene	8.53526e-12	-9.38041	down
LITCHI030868.m1.gene	0.0264018	-0.667438	down
LITCHI019347.m1.gene	1.89983e-08	0.702048	up
LITCHI026453.m1.gene	0.00122796	0.789607	up
LITCHI005653.m1.gene	6.84842e-20	0.632916	up
LITCHI020243.m1.gene	0.0303603	1.12864	up
LITCHI010679.m1.gene	3.9064e-06	2.60404	up
LITCHI005880.m1.gene	4.01179e-13	-0.620223	down
LITCHI023904.m1.gene	0.000871533	-0.721908	down
Litchi_chinensis_newGene_3302	0.0136024	-0.83626	down
LITCHI020908.m1.gene	5.75236e-119	1.94644	up
LITCHI015258.m1.gene	8.44403e-07	-0.924027	down
LITCHI027085.m1.gene	9.4492e-15	0.680875	up
LITCHI022539.m1.gene	0.0342959	-1.69274	down
LITCHI029564.m1.gene	0.0054827	0.743427	up
LITCHI010557.m1.gene	0.00330215	0.688336	up
LITCHI009615.m1.gene	5.01517e-06	0.631125	up
LITCHI017723.m1.gene	0.0136052	0.642862	up
LITCHI010045.m1.gene	1.01063e-81	5.86729	up
LITCHI020961.m1.gene	2.13565e-08	0.772595	up
LITCHI004065.m1.gene	0.00614762	1.26621	up
Litchi_chinensis_newGene_6982	1.15215e-07	-2.84982	down
LITCHI009383.m1.gene	1.41141e-31	1.67199	up
LITCHI016355.m1.gene	0.00456435	-0.77423	down
LITCHI024190.m1.gene	0.000210988	-0.908249	down
LITCHI016177.m1.gene	5.46897e-08	2.1985	up
LITCHI006774.m1.gene	0.000223676	-1.5617	down
LITCHI026454.m1.gene	0.0313676	0.694585	up
LITCHI011712.m1.gene	3.45966e-14	1.06633	up
LITCHI025308.m2.gene	8.92623e-08	-2.20365	down
LITCHI030338.m2.gene	0.0366466	-1.13425	down
LITCHI026513.m1.gene	0.0237529	-0.873852	down
LITCHI021457.m1.gene	1.2902e-89	1.43192	up
LITCHI003682.m1.gene	2.58452e-05	0.593301	up
LITCHI006867.m2.gene	5.8116e-05	2.17487	up
LITCHI010860.m1.gene	9.65243e-05	2.9553	up
LITCHI019613.m2.gene	0.0400609	0.827968	up
LITCHI019342.m1.gene	0.00356548	1.83231	up
LITCHI005694.m1.gene	0.00365985	1.20405	up
LITCHI009186.m1.gene	7.43985e-07	0.865996	up
LITCHI000673.m1.gene	6.81791e-12	2.46008	up
LITCHI021077.m1.gene	1.18852e-08	0.586425	up
LITCHI015318.m1.gene	0.00328	1.44967	up
LITCHI011993.m1.gene	5.93798e-09	-0.956992	down
LITCHI022558.m1.gene	1.82937e-05	-1.69696	down
LITCHI031619.m1.gene	1.96054e-92	6.06158	up
LITCHI028927.m1.gene	0.000966233	-0.736808	down
LITCHI006815.m3.gene	0.00607026	-1.1036	down
LITCHI000598.m1.gene	1.14135e-09	1.12022	up
LITCHI008740.m2.gene	0.0384281	-1.43797	down
LITCHI025501.m1.gene	0.0162039	-0.730483	down
LITCHI018447.m1.gene	4.75364e-21	3.2482	up
LITCHI006304.m1.gene	7.19968e-09	1.05723	up
Litchi_chinensis_newGene_343	6.44533e-07	2.01604	up
LITCHI020375.m1.gene	9.34469e-10	-1.81047	down
LITCHI008501.m1.gene	8.05628e-08	0.907602	up
LITCHI027272.m2.gene	0.0333389	-0.793283	down
LITCHI001169.m1.gene	0.000474848	1.10622	up
LITCHI005387.m1.gene	2.29655e-25	0.799735	up
LITCHI007762.m1.gene	3.5016e-09	1.26527	up
LITCHI031115.m2.gene	2.91733e-07	12.6524	up
LITCHI014695.m1.gene	3.42e-06	1.93084	up
LITCHI010540.m1.gene	8.5371e-06	0.935878	up
LITCHI019034.m1.gene	4.52288e-23	0.769036	up
LITCHI016820.m14.gene	0.0292882	-0.594179	down
LITCHI005411.m1.gene	2.31677e-53	-1.01232	down
LITCHI029588.m1.gene	0.00883153	0.776981	up
LITCHI014522.m1.gene	0.0453185	1.66701	up
LITCHI024281.m1.gene	0.00105679	-4.29293	down
LITCHI023932.m1.gene	0.00256359	-1.13325	down
LITCHI026742.m1.gene	0.0211651	-1.07605	down
LITCHI012965.m1.gene	3.04147e-05	-0.83881	down
LITCHI023230.m1.gene	5.81837e-05	0.979902	up
LITCHI027610.m1.gene	0.000680063	1.19685	up
LITCHI030492.m4.gene	0.0435689	1.56217	up
LITCHI000592.m1.gene	0.0403293	0.789272	up
LITCHI001383.m1.gene	7.12832e-94	3.6945	up
LITCHI013424.m1.gene	0.00854008	0.628251	up
LITCHI027023.m1.gene	2.17771e-05	-1.74891	down
LITCHI023979.m1.gene	4.82563e-21	3.38205	up
LITCHI026977.m2.gene	0.000643774	3.92916	up
LITCHI021210.m1.gene	1.5703e-09	8.75191	up
LITCHI001741.m1.gene	0.00923216	-1.08268	down
LITCHI025323.m1.gene	0.00567362	0.788917	up
LITCHI029373.m1.gene	1.65482e-05	-0.940785	down
Litchi_chinensis_newGene_1564	1.90821e-06	-0.887993	down
LITCHI014254.m1.gene	0.0143659	0.806626	up
LITCHI011779.m1.gene	0.000300756	-0.755063	down
LITCHI018040.m1.gene	1.18178e-44	-0.931181	down
LITCHI030924.m1.gene	1.3638e-14	-12.7853	down
LITCHI019933.m1.gene	0.00674874	-0.598803	down
LITCHI003767.m1.gene	6.65673e-05	-0.769518	down
LITCHI015017.m1.gene	0.025889	-4.03078	down
LITCHI011601.m1.gene	8.58406e-05	0.674777	up
LITCHI010643.m1.gene	3.4284e-11	0.595191	up
LITCHI005222.m1.gene	1.26425e-12	0.586629	up
LITCHI001658.m1.gene	2.11262e-31	1.74083	up
LITCHI021926.m1.gene	7.47508e-08	-8.26606	down
LITCHI020245.m1.gene	1.89419e-44	2.25238	up
LITCHI010102.m1.gene	0.0374558	0.994044	up
LITCHI017479.m1.gene	0.00234494	-1.20451	down
LITCHI010022.m1.gene	0.00234494	1.15108	up
LITCHI002320.m1.gene	0.000127465	1.10659	up
LITCHI028926.m3.gene	0.00863927	-0.892983	down
LITCHI021612.m1.gene	0.0172129	-1.44988	down
LITCHI018886.m1.gene	0.00151781	-1.40445	down
LITCHI020734.m2.gene	7.97744e-06	-0.8472	down
LITCHI008387.m1.gene	0.00171404	0.616443	up
LITCHI027022.m6.gene	0.000285436	-1.16706	down
LITCHI029639.m5.gene	3.75175e-06	0.922715	up
LITCHI022476.m1.gene	1.53128e-19	-0.635101	down
LITCHI026051.m1.gene	1.37411e-54	1.38412	up
LITCHI016602.m3.gene	0.0394288	-0.586873	down
LITCHI024009.m1.gene	0.0166871	-0.669549	down
LITCHI007572.m1.gene	5.24995e-26	1.517	up
LITCHI005707.m1.gene	0.0431693	0.612807	up
LITCHI004868.m2.gene	0.0357437	0.850053	up
LITCHI024448.m1.gene	0.00140026	-0.819422	down
LITCHI013845.m1.gene	0.0491912	0.621403	up
LITCHI013228.m1.gene	0.000677249	-1.37635	down
LITCHI018373.m1.gene	0.00727336	-0.922394	down
LITCHI030356.m1.gene	0.0357437	2.63652	up
LITCHI010370.m2.gene	3.34755e-07	1.11127	up
LITCHI004115.m1.gene	0.0035463	0.913417	up
LITCHI013032.m1.gene	2.69384e-05	2.82422	up
LITCHI003052.m1.gene	5.83985e-10	0.936872	up
LITCHI014317.m7.gene	0.0347205	-2.22909	down
LITCHI020277.m1.gene	0.000619508	0.586602	up
LITCHI030346.m1.gene	0.00224185	1.82019	up
LITCHI010433.m1.gene	8.40794e-05	1.37768	up
LITCHI018251.m1.gene	6.52018e-23	1.46642	up
LITCHI011350.m1.gene	0.0374329	-0.656428	down
LITCHI005860.m1.gene	0.0363371	0.597368	up
LITCHI013195.m1.gene	2.27382e-06	0.697767	up
LITCHI002640.m1.gene	5.18112e-08	3.66906	up
LITCHI022500.m1.gene	2.27525e-05	-0.790754	down
LITCHI008804.m1.gene	0.0194072	-0.616995	down
LITCHI031673.m2.gene	1.01776e-06	1.0874	up
LITCHI030856.m1.gene	0.0280757	-1.40116	down
LITCHI007326.m1.gene	0.00738794	-2.76917	down
LITCHI017491.m10.gene	9.24075e-09	-0.944318	down
LITCHI007192.m1.gene	0.00378303	1.32116	up
LITCHI003898.m1.gene	6.00159e-13	3.85186	up
LITCHI015705.m1.gene	0.00351592	-1.51317	down
LITCHI012440.m1.gene	0.010004	-0.825051	down
LITCHI030979.m1.gene	1.66411e-11	-12.1959	down
LITCHI030631.m1.gene	3.73571e-05	-0.644827	down
LITCHI022271.m2.gene	0.035816	-0.808591	down
LITCHI003790.m1.gene	2.8656e-17	0.7185	up
LITCHI004412.m1.gene	0.0215374	-0.911953	down
LITCHI013716.m1.gene	3.54164e-11	-0.894764	down
LITCHI020874.m1.gene	0.000911291	-0.755302	down
LITCHI018209.m1.gene	0.00923216	0.931581	up
LITCHI009440.m1.gene	0.0313676	0.64506	up
LITCHI024478.m1.gene	0.0401372	-1.04974	down

## Sheet: DElncRNAs in fruits
Summary of DElncRNAs identified in fruits
ID	Pvalue	log2FC	regulated
MSTRG.25380.1	0.011856	-3.50583	down
MSTRG.29558.1	0.042601	-0.780344	down
MSTRG.12162.1	0.0357214	1.94831	up
MSTRG.23346.7	1.05337e-08	-8.02553	down
MSTRG.23346.4	3.76516e-05	-6.29856	down
MSTRG.5899.1	0.0469453	1.71867	up
MSTRG.1545.5	0.0401124	-0.831883	down
MSTRG.14087.3	0.0280132	-5.78241	down
MSTRG.6278.1	0.0469254	1.22806	up
MSTRG.16207.2	0.0197216	1.4514	up
MSTRG.22317.2	0.00332776	-1.53414	down
MSTRG.15328.1	0.000907802	5.61205	up
MSTRG.23474.1	0.030201	-0.975148	down
MSTRG.21403.1	0.00910475	1.38142	up
MSTRG.15653.2	0.0133684	4.15206	up
MSTRG.30357.3	0.0423946	-2.31403	down
MSTRG.15909.1	0.00925891	-4.66423	down
MSTRG.16125.1	0.0202638	-2.71209	down
MSTRG.21368.10	0.00227554	-4.72805	down
MSTRG.29637.2	0.00519452	-1.90379	down
MSTRG.3642.3	0.0249922	0.829492	up
MSTRG.1628.2	0.0241822	0.667158	up
MSTRG.31974.3	0.00429593	-2.02931	down
MSTRG.22765.26	0.00284786	-4.78649	down
MSTRG.19709.7	0.000673961	-2.78334	down
MSTRG.32333.1	0.00395439	-5.74575	down
MSTRG.5897.86	0.000209786	4.3197	up
MSTRG.15825.1	0.0156549	-4.64347	down
MSTRG.8056.1	0.0157226	-4.63929	down
MSTRG.27505.13	0.0172632	-1.88569	down
MSTRG.16356.1	0.0395011	-2.33821	down
MSTRG.11636.7	0.00546311	-1.643	down
MSTRG.18246.4	0.000192877	-6.0971	down
MSTRG.5777.1	0.0249829	-2.10743	down
MSTRG.1232.10	0.0125093	2.79417	up
MSTRG.20921.3	0.034175	1.38874	up
MSTRG.13538.1	0.0339031	-4.12317	down
MSTRG.8071.37	0.0120705	1.03106	up
MSTRG.3089.1	0.041918	1.77312	up
MSTRG.25620.1	0.00602715	-3.681	down
MSTRG.13161.2	0.00240857	5.26778	up
MSTRG.30038.3	0.0056528	0.659195	up
MSTRG.2182.1	0.0405411	-1.1743	down
MSTRG.15305.1	0.0326456	-2.49929	down
MSTRG.10454.1	0.0177984	-3.91929	down
MSTRG.27184.14	0.00685273	4.86076	up
MSTRG.25244.1	0.0069722	5.36724	up
MSTRG.30978.8	0.000153071	-6.03713	down
MSTRG.24074.16	0.00186938	3.69702	up
MSTRG.22584.5	0.00182155	-5.73644	down
MSTRG.11647.8	0.0379738	-2.5796	down
MSTRG.1847.1	0.00735915	-1.9192	down
MSTRG.11277.5	1.24645e-05	-6.42835	down
MSTRG.17112.3	0.0388056	3.02365	up
MSTRG.17112.4	0.00755329	2.14843	up
MSTRG.26015.1	0.0434087	-0.702065	down
MSTRG.7354.4	0.033157	-2.92874	down
MSTRG.24488.18	0.0129644	1.87161	up
MSTRG.24488.19	0.0266401	-1.10998	down
MSTRG.22566.8	0.000874822	6.58831	up
MSTRG.12436.1	0.00309092	1.25903	up
MSTRG.19941.3	0.0253497	4.43467	up
MSTRG.18352.1	0.0116921	4.66446	up
MSTRG.23053.2	0.0296805	-3.59466	down
MSTRG.9546.9	0.0298426	-1.58474	down
MSTRG.18144.1	9.28496e-05	5.04786	up
MSTRG.15530.2	0.0104648	2.06147	up
MSTRG.16470.2	0.00773989	-0.672962	down
MSTRG.16007.2	0.0208591	-3.57999	down
MSTRG.22765.30	0.0061798	-5.22364	down
MSTRG.30918.2	0.01245	-0.882665	down
MSTRG.27841.1	0.0394826	-4.41675	down
MSTRG.670.3	0.000935086	-5.54387	down
MSTRG.16217.20	0.0378375	-0.928827	down
MSTRG.11636.1	0.0173272	2.59383	up
MSTRG.32129.1	0.0139499	-3.49348	down
MSTRG.27146.3	0.0143339	3.29157	up
MSTRG.27146.6	0.00201557	2.10508	up
MSTRG.27966.13	0.0429241	-2.2767	down
MSTRG.16031.1	0.00131352	-1.48059	down
MSTRG.17755.1	0.0018552	-1.79652	down
MSTRG.26016.3	0.0466696	-1.65351	down
MSTRG.32409.1	0.0416401	1.20403	up
MSTRG.31735.3	0.0344782	-3.67427	down
MSTRG.4924.1	0.035822	3.20025	up
MSTRG.9197.2	0.0455701	-1.72412	down
MSTRG.27175.11	0.000805401	-1.13187	down
MSTRG.17336.2	0.0374688	2.36209	up
MSTRG.15531.4	0.0348592	2.27467	up

## Sheet: DElncRNAs in leaves
Summary of DElncRNAs identified in leaves
ID	Pvalue	log2FC	regulated
MSTRG.13392.1	0.0164871	3.46096	up
MSTRG.5884.80	0.0174769	3.19328	up
MSTRG.21234.2	0.0468916	-3.88335	down
MSTRG.22600.1	0.00452131	-3.77582	down
MSTRG.22284.8	0.0181363	0.884289	up
MSTRG.28068.1	0.0392788	-3.96759	down
MSTRG.31390.2	4.12135e-05	-3.78087	down
MSTRG.24203.13	9.6899e-06	-7.16727	down
MSTRG.24767.1	0.0157978	1.87049	up
MSTRG.19130.2	0.025488	0.946462	up
MSTRG.20706.1	0.0205876	-3.56269	down
MSTRG.6278.1	0.035556	-1.61366	down
MSTRG.13444.26	0.0129402	-3.93288	down
MSTRG.25479.1	0.0366243	-2.28771	down
MSTRG.25122.5	0.0233344	-3.01398	down
MSTRG.27287.1	0.00672367	-3.74196	down
MSTRG.24533.1	0.0208662	4.3151	up
MSTRG.23474.3	0.0122392	5.21248	up
MSTRG.15653.2	0.0195217	3.70704	up
MSTRG.13781.2	0.000816486	-1.39542	down
MSTRG.6450.1	0.0131429	-1.51456	down
MSTRG.6709.1	0.0417666	0.971172	up
MSTRG.32887.3	0.00229371	4.5086	up
MSTRG.29399.3	0.0281349	-3.07913	down
MSTRG.25747.34	0.0355969	1.539	up
MSTRG.25747.30	2.92929e-06	-6.52429	down
MSTRG.28148.1	0.0485619	-1.22734	down
MSTRG.23390.2	0.0135327	1.87853	up
MSTRG.10055.1	0.037884	-0.935596	down
MSTRG.29637.2	0.0320712	-0.739985	down
MSTRG.6937.1	0.0161625	-3.72486	down
MSTRG.22697.33	0.0210232	3.15019	up
MSTRG.14919.5	0.0153071	-0.898589	down
MSTRG.5897.81	4.08335e-05	-11.2319	down
MSTRG.5897.83	0.00930467	0.662442	up
MSTRG.5897.84	0.0124627	0.930231	up
MSTRG.15825.1	0.00770075	-4.98287	down
MSTRG.25703.1	3.86722e-06	-6.60734	down
MSTRG.5884.36	0.0177522	1.0245	up
MSTRG.2212.1	0.0146304	-1.77757	down
MSTRG.16352.11	0.000369204	-5.29466	down
MSTRG.15423.1	0.0174266	-2.56452	down
MSTRG.33071.1	0.000325371	-6.12563	down
MSTRG.28103.1	0.0460271	2.3935	up
MSTRG.7445.1	0.0188821	-3.07673	down
MSTRG.16001.10	0.00684254	5.03002	up
MSTRG.25122.6	0.0357844	-2.87589	down
MSTRG.12978.3	0.00492902	-4.17852	down
MSTRG.3434.1	0.00299027	-2.12905	down
MSTRG.8688.5	0.0166207	-4.95246	down
MSTRG.22737.110	0.0162452	2.97065	up
MSTRG.7923.2	0.0253833	0.681598	up
MSTRG.12920.1	0.00118639	-5.671	down
MSTRG.9170.3	0.0130409	-3.03154	down
MSTRG.14398.7	0.0359232	-2.59222	down
MSTRG.32862.3	0.0167242	-1.73928	down
MSTRG.3851.1	0.0254438	-2.81774	down
MSTRG.17331.1	0.00469574	0.873261	up
MSTRG.30978.10	0.0401755	1.03358	up
MSTRG.25951.1	4.87167e-06	-2.11779	down
MSTRG.27718.1	0.00305715	-4.7745	down
MSTRG.17729.1	0.0141755	-5.37495	down
MSTRG.20919.11	0.0167443	3.59134	up
MSTRG.22598.1	0.00293711	-1.62229	down
MSTRG.30024.1	0.00602877	-1.09022	down
MSTRG.32588.1	0.00725248	-3.37926	down
MSTRG.27791.1	0.0192205	1.06503	up
MSTRG.22584.6	0.020569	-2.65512	down
MSTRG.5894.1	0.0120069	-1.33729	down
MSTRG.10065.1	0.00548118	4.93185	up
MSTRG.17380.2	0.00396914	-5.73941	down
MSTRG.10392.16	0.000938058	-2.62478	down
MSTRG.8148.2	0.0439619	3.84313	up
MSTRG.23406.5	2.5669e-09	8.26947	up
MSTRG.23406.6	0.000486211	-4.49216	down
MSTRG.28467.7	0.0211098	-1.56581	down
MSTRG.17149.7	0.00958003	-4.9975	down
MSTRG.31163.1	0.0296252	-3.1822	down
MSTRG.5885.20	0.0245815	2.30513	up
MSTRG.5885.21	6.10562e-07	3.69879	up
MSTRG.22566.1	0.00716472	-4.81844	down
MSTRG.1595.17	0.0273876	-0.729846	down
MSTRG.5884.40	6.1382e-07	8.77729	up
MSTRG.5884.47	0.00556363	0.960565	up
MSTRG.19941.1	0.00173741	1.70071	up
MSTRG.7598.1	0.00233683	1.80812	up
MSTRG.7598.2	0.0117559	2.21711	up
MSTRG.5897.79	0.0167278	1.5762	up
MSTRG.16919.1	0.0174508	-4.22367	down
MSTRG.8084.2	0.0278096	1.51294	up
MSTRG.24227.3	0.0209743	-4.38178	down
MSTRG.19544.1	0.00990272	0.858366	up
MSTRG.5375.1	0.0290426	-2.34276	down
MSTRG.21217.7	0.021011	1.45841	up
MSTRG.27029.96	0.0346712	0.643441	up
MSTRG.30321.1	0.00391067	1.87342	up
MSTRG.29347.2	0.00340114	-4.94515	down
MSTRG.16032.1	0.00431422	-0.868781	down
MSTRG.12543.1	0.0173956	1.95677	up
MSTRG.26412.6	2.46381e-06	-6.76038	down
MSTRG.29769.1	0.0213156	-3.52916	down
MSTRG.26973.1	5.93564e-08	-1.68018	down
MSTRG.5885.10	0.0186141	0.957176	up
MSTRG.23387.1	0.0054816	4.76478	up
MSTRG.12750.1	9.45648e-05	-5.73267	down
MSTRG.24113.3	0.00913579	-3.01681	down
MSTRG.25747.2	0.0196671	-1.94943	down
MSTRG.30797.7	0.040445	-1.35559	down
MSTRG.15688.1	0.0290613	-4.0935	down
MSTRG.16732.6	0.0167858	-3.20255	down
MSTRG.16689.1	0.00450251	-1.98185	down
MSTRG.23608.1	0.00252747	1.7034	up
MSTRG.26682.2	0.0424093	-1.51016	down
MSTRG.28148.3	0.00140427	6.4323	up
MSTRG.28148.2	8.07674e-05	6.76606	up
MSTRG.11640.12	0.031784	1.36638	up
MSTRG.11640.14	0.0173011	5.60229	up
MSTRG.5719.9	0.0198773	-1.68595	down
MSTRG.16565.3	0.00633906	-4.85955	down
MSTRG.15920.1	0.0174793	-2.53373	down
MSTRG.22811.4	0.00220599	-5.4515	down
MSTRG.26963.1	3.82463e-05	6.66935	up
MSTRG.22251.12	0.0345097	-2.87561	down
MSTRG.21457.3	0.0356885	-4.82687	down
MSTRG.8263.1	0.0132445	-1.81375	down
MSTRG.26016.2	0.0317067	1.44522	up
MSTRG.5884.63	0.0151373	0.854927	up
MSTRG.21052.1	0.0311189	-4.62946	down
MSTRG.16477.1	0.0423261	1.08546	up
MSTRG.7674.1	0.0263927	-3.87152	down
MSTRG.27175.14	0.0260651	4.39805	up
MSTRG.958.21	1.99192e-05	-6.12827	down

## Sheet: DEcircRNAs in fruits
Summary of DEcircRNAs identified in fruits
ID	Pvalue	log2FC	regulated
Chr1:10429444|10457192	0.0421286	-0.898381	down
Chr1:32809811|32822413	0.0121933	-1.32754	down
Chr1:36965967|36972887	0.0228682	-0.802793	down
Chr11:267843|272581	0.0195629	-5.0809	down
Chr11:7117136|7123854	0.00163016	-0.954248	down
Chr11:7118144|7124735	0.0102876	-0.858932	down
Chr11:23219173|23228747	6.331e-11	-8.603	down
Chr13:8569195|8623636	0.00327363	0.700426	up
Chr13:12638598|12653782	6.99714e-13	1.82667	up
Chr15:184838|189848	0.000154817	-1.05249	down
Chr15:6362006|6368000	9.20647e-09	0.686135	up
Chr15:12002655|12030633	9.13231e-10	-0.619218	down
Chr2:34743655|34804151	0.0165267	-1.18637	down
Chr5:29694792|29698385	9.38388e-06	3.70181	up
Chr5:30814962|30819460	1.5451e-29	13.4687	up
Chr5:32156862|32157024	0.0322031	-4.98306	down
Chr5:33451685|33473538	6.67494e-16	-0.859114	down
Chr7:4502955|4503188	0.0407644	4.97171	up
Chr7:29201634|29213161	0.0170768	1.47699	up
Chr8:21413489|21413718	0.0407607	3.20164	up
Chr8:21413519|21413766	2.16596e-11	8.53232	up
Chr8:21413525|21413718	0.00619985	0.644954	up
Chr8:21413989|21414177	0.0137326	0.587063	up
Chr8:21414115|21414321	9.6359e-05	6.26888	up
Chr8:22782196|22787956	0.0254363	-3.88427	down
Chr9:17354633|17365912	0.0152376	4.98103	up
Chr9:17854414|17910294	0.00841675	-0.591115	down
Chr9:25562532|25631064	0.00241491	-0.74182	down

## Sheet: DEcircRNAs in leaves
Summary of DEcircRNAs identified in leaves
ID	Pvalue	log2FC	regulated
Chr1:13840451|13914010	0.0183013	4.18036	up
Chr1:14095681|14105396	0.0388035	3.18181	up
Chr1:48401093|48412499	0.00566915	-5.52911	down
Chr12:17674559|17675146	0.00466597	5.85065	up
Chr13:12638598|12653782	0.00102698	3.40058	up
Chr13:20833405|20852938	0.0355223	-4.61472	down
Chr15:14556168|14557265	0.0175747	-5.10002	down
Chr2:24605323|24605498	0.0275639	4.81767	up
Chr3:7203019|7205451	0.0210918	4.94908	up
Chr4:15071712|15119870	0.0157554	5.06052	up
Chr4:24466653|24469243	0.024944	-4.82708	down
Chr5:29661325|29662350	0.0163192	-5.05329	down
Chr6:28756760|28791576	0.0248392	-4.88688	down

## Sheet: DEmiRNAs in fruits
Summary of DEmiRNAs identified in fruits
ID	Pvalue	log2FC	regulated
gma-miR164a	0.00699806	2.07711	up
mdm-miR171g	0.0116352	2.56711	up
ppe-miR171a	0.0150149	2.38394	up
novel_miR_106	0.0280974	2.0222	up
novel_miR_107	0.0432463	1.81956	up
novel_miR_111	0.0230387	2.48338	up
novel_miR_151	0.0103488	1.26032	up
novel_miR_16	0.0139014	1.34435	up
novel_miR_160	0.0180403	1.89727	up
novel_miR_172	0.024327	1.52615	up
novel_miR_177	0.0363674	1.71534	up
novel_miR_202	0.0427211	1.11296	up
novel_miR_208	0.0102573	1.99673	up
novel_miR_230	0.0239444	1.82062	up
novel_miR_238	0.00546514	2.34332	up
novel_miR_28	0.00301879	2.25959	up
novel_miR_303	0.0239444	1.82062	up
novel_miR_306	0.0282967	1.08735	up
novel_miR_332	0.0202625	1.47237	up
novel_miR_35	0.0301832	1.33667	up
novel_miR_352	0.0218537	1.80007	up
novel_miR_360	0.0280974	2.0222	up
novel_miR_371	0.0205427	1.51517	up
novel_miR_49	0.00146513	2.40958	up
novel_miR_70	0.0258767	2.05452	up
novel_miR_82	0.0202625	1.47237	up
novel_miR_92	0.0117371	1.63352	up
novel_miR_94	0.0193738	-1.18936	down

## Sheet: DEmiRNAs in leaves
Table S2. Summary of DEmiRNAs identified in leaves
ID	Pvalue	log2FC	regulated
ath-miR160a-5p	0.0310352	1.5574	up
cas-miR160a	0.0310352	1.5574	up
cme-miR319a	0.0465504	1.00354	up
cpa-miR160c-5p	0.0179433	1.82307	up
cpa-miR160f-5p	0.0179433	1.82307	up
csi-miR159c-3p	0.0455552	1.02775	up
csi-miR167d-5p	0.0455461	0.941089	up
csi-miR171a	0.0446632	1.22269	up
csi-miR395b-3p	2.25216e-12	3.26268	up
csi-miR395b-5p	0.0221158	2.41754	up
ctr-miR319	0.0455552	1.02775	up
fve-miR156g-3p	0.0250146	2.30208	up
fve-miR160b	0.0179666	1.76113	up
ghr-miR167b	0.0455461	0.941089	up
gma-miR164a	0.00103244	1.88297	up
hbr-miR319	0.0494759	0.994959	up
lja-miR167c	0.00982206	1.34411	up
mdm-miR160c	0.0179666	1.76113	up
mdm-miR160e	0.0179666	1.76113	up
mdm-miR167c	0.0455461	0.941089	up
mdm-miR171f-3p	0.0446632	1.22269	up
mes-miR160d	0.0225635	1.6448	up
mes-miR160h	0.0179666	1.76113	up
mes-miR166e	0.0282442	1.11876	up
mes-miR319b	0.0455929	1.01342	up
mtr-miR319b-3p	0.0465504	1.00354	up
pla-miR11602	0.0262962	1.52926	up
ptc-miR160b-5p	0.0179666	1.76113	up
ptc-miR160c-5p	0.0179666	1.76113	up
ptc-miR166h	0.0282442	1.11876	up
ptc-miR319c	0.0489319	0.998632	up
rco-miR166d	0.0282442	1.11876	up
rco-miR171a	0.0446632	1.22269	up
rco-miR171b	0.0446632	1.22269	up
tcc-miR167a	0.0455461	0.941089	up
vca-miR156b-3p	0.0250146	2.30208	up
vvi-miR160e	0.0225635	1.6448	up
vvi-miR166h	0.0282442	1.11876	up
vvi-miR319c	0.0473542	1.00534	up
vvi-miR395b	2.25216e-12	3.26268	up
vvi-miR395c	2.25216e-12	3.26268	up
vvi-miR395e	2.25216e-12	3.26268	up
vvi-miR395h	2.25216e-12	3.26268	up
vvi-miR395k	2.25216e-12	3.26268	up
vvi-miR395m	2.25216e-12	3.26268	up
novel_miR_1	0.0390499	-0.794407	down
novel_miR_100	0.00160027	-2.14021	down
novel_miR_101	0.0337534	-1.39756	down
novel_miR_107	4.26186e-05	3.33718	up
novel_miR_109	0.032118	-1.33827	down
novel_miR_110	0.0131458	-0.907585	down
novel_miR_114	0.00817044	-1.67391	down
novel_miR_115	0.0110224	-1.32364	down
novel_miR_116	0.0283505	1.20621	up
novel_miR_118	0.0109605	-1.61814	down
novel_miR_119	0.006099	-1.58675	down
novel_miR_122	0.010129	-1.27244	down
novel_miR_126	0.023598	-1.26681	down
novel_miR_127	0.00849113	-1.49331	down
novel_miR_134	0.0177874	-1.20028	down
novel_miR_137	0.00132034	1.55874	up
novel_miR_140	0.0209682	0.919583	up
novel_miR_143	0.0289576	-1.00819	down
novel_miR_146	0.0187461	-1.61015	down
novel_miR_147	0.000295813	-1.78785	down
novel_miR_148	0.0184263	-1.23356	down
novel_miR_15	0.0283505	1.20621	up
novel_miR_152	0.000864673	2.05824	up
novel_miR_160	5.97727e-05	2.82457	up
novel_miR_161	0.00514937	-1.53722	down
novel_miR_165	0.0171089	-1.24649	down
novel_miR_167	0.0301011	-1.00698	down
novel_miR_168	0.00337666	-1.33966	down
novel_miR_17	0.0168828	-1.18595	down
novel_miR_172	0.0213081	1.10441	up
novel_miR_176	0.0395268	1.3689	up
novel_miR_179	0.00918133	-1.46883	down
novel_miR_182	0.00618028	-1.31526	down
novel_miR_189	0.035206	-1.0113	down
novel_miR_19	0.00817044	-1.67391	down
novel_miR_194	0.0296305	-1.47183	down
novel_miR_195	0.00223496	-1.37415	down
novel_miR_196	0.0100396	-1.66834	down
novel_miR_207	0.00136084	-1.31803	down
novel_miR_208	0.043198	1.42979	up
novel_miR_209	0.019159	-1.21974	down
novel_miR_21	0.00817044	-1.67391	down
novel_miR_210	0.0218199	1.24786	up
novel_miR_211	0.0328628	-1.52137	down
novel_miR_212	0.00122048	-1.92129	down
novel_miR_213	0.00817044	-1.67391	down
novel_miR_217	0.00149451	1.73182	up
novel_miR_22	0.000146938	-1.99868	down
novel_miR_221	0.0446744	0.734284	up
novel_miR_222	0.00173678	-1.28204	down
novel_miR_223	0.000864673	2.05824	up
novel_miR_225	0.0231141	-1.33775	down
novel_miR_226	0.0119188	-1.25325	down
novel_miR_230	0.00317407	1.86742	up
novel_miR_231	0.0308383	1.09274	up
novel_miR_233	0.00648715	-1.54283	down
novel_miR_238	0.00668559	1.50834	up
novel_miR_24	0.0320832	1.20339	up
novel_miR_242	0.0266939	-1.52374	down
novel_miR_245	0.00637836	-1.46885	down
novel_miR_246	0.0205926	-0.918869	down
novel_miR_247	0.00263769	-1.28388	down
novel_miR_25	0.0307253	1.02098	up
novel_miR_250	0.0445481	1.0841	up
novel_miR_252	0.00257059	1.85672	up
novel_miR_253	0.0378105	0.957743	up
novel_miR_255	0.0050453	1.73172	up
novel_miR_258	0.0282325	-1.17407	down
novel_miR_262	0.0303983	-1.24549	down
novel_miR_264	0.0083094	-1.66208	down
novel_miR_265	0.0271438	-0.891454	down
novel_miR_268	0.00844788	-1.01383	down
novel_miR_27	0.0217825	-1.19736	down
novel_miR_272	0.0352622	-1.20692	down
novel_miR_273	0.00646441	-1.44693	down
novel_miR_276	0.0267145	-1.19761	down
novel_miR_280	0.00817044	-1.67391	down
novel_miR_281	0.0495257	-1.01861	down
novel_miR_289	0.0217825	-1.19736	down
novel_miR_291	0.0463036	-1.07127	down
novel_miR_292	0.00646441	-1.44693	down
novel_miR_294	0.0015621	-1.2909	down
novel_miR_3	0.0450161	-0.771465	down
novel_miR_30	0.0481371	-1.29541	down
novel_miR_300	0.0262321	-1.38357	down
novel_miR_303	0.00317407	1.86742	up
novel_miR_304	0.0178302	-1.17947	down
novel_miR_305	0.00817044	-1.67391	down
novel_miR_308	0.0019217	1.87075	up
novel_miR_309	0.0280818	-0.818851	down
novel_miR_310	0.0443702	-1.56093	down
novel_miR_311	0.0484303	1.06176	up
novel_miR_312	0.00534216	1.62188	up
novel_miR_314	0.0292336	-1.08149	down
novel_miR_316	0.0371387	1.11038	up
novel_miR_320	0.0368833	-0.874516	down
novel_miR_323	0.00209152	-1.85895	down
novel_miR_324	0.0384196	-1.25137	down
novel_miR_326	0.000295813	-1.78785	down
novel_miR_329	0.0446744	0.734284	up
novel_miR_33	0.0178302	-1.17947	down
novel_miR_330	0.0307253	1.02098	up
novel_miR_332	0.0138643	1.00026	up
novel_miR_334	0.00417399	-1.21823	down
novel_miR_337	0.000295813	-1.78785	down
novel_miR_340	0.00248956	-1.24985	down
novel_miR_347	0.0106005	-1.24287	down
novel_miR_35	0.0121881	1.02889	up
novel_miR_350	0.0365025	-1.01495	down
novel_miR_353	0.00504126	-1.30937	down
novel_miR_355	0.00554484	-1.62513	down
novel_miR_362	0.0178308	1.32131	up
novel_miR_363	0.048561	1.07586	up
novel_miR_364	0.00193922	-1.75663	down
novel_miR_366	0.0357628	-1.42655	down
novel_miR_37	0.00245075	2.64156	up
novel_miR_370	0.000827237	-1.45209	down
novel_miR_376	0.0178434	-1.14375	down
novel_miR_38	0.0136425	-1.11346	down
novel_miR_382	0.00928027	-1.44822	down
novel_miR_383	0.0217825	-1.19736	down
novel_miR_388	0.0217825	-1.19736	down
novel_miR_389	0.000327856	-1.79081	down
novel_miR_39	0.0178308	1.32131	up
novel_miR_390	0.0251187	-1.19756	down
novel_miR_391	0.0280818	-0.818851	down
novel_miR_392	0.00288185	-1.65787	down
novel_miR_4	0.0352121	-1.62978	down
novel_miR_42	0.0325064	-0.93306	down
novel_miR_45	0.0195024	-1.47122	down
novel_miR_46	0.00931325	-1.13468	down
novel_miR_48	0.00785699	-1.19476	down
novel_miR_49	0.0477536	0.787673	up
novel_miR_52	0.00414142	2.01412	up
novel_miR_55	0.0283505	1.20621	up
novel_miR_57	0.00931325	-1.13468	down
novel_miR_61	0.00218316	-1.13281	down
novel_miR_68	0.0317323	-0.790199	down
novel_miR_69	0.00817044	-1.67391	down
novel_miR_71	1.2338e-06	1.90818	up
novel_miR_72	0.0167671	-1.38347	down
novel_miR_75	0.0106058	-1.63387	down
novel_miR_77	0.049496	0.907482	up
novel_miR_78	0.0131458	-0.907585	down
novel_miR_82	0.0138643	1.00026	up
novel_miR_86	0.0443192	-1.17688	down
novel_miR_89	0.00817044	-1.67391	down
novel_miR_90	0.0292336	-1.08149	down
novel_miR_91	0.00276477	-1.56609	down
novel_miR_92	0.0319448	0.882276	up
novel_miR_95	0.00612889	-1.49453	down
novel_miR_96	0.0036356	-1.6401	down
