# Supplementary material
Source: MDPI journal article supplement (https://www.mdpi.com/2073-4395/13/7/1904)
Supplement: s1 [file s1 › Table S3. KEGG analysis of differential expression mRNAs and ncRNAs.xlsx]

## Sheet: DEmRNAs in fruits
KEGG pathway assignments for DEmRNAs in fruits
ID	Description	GeneRatio	BgRatio	enrich_factor	pvalue	qvalue	geneID
ko00940	Phenylpropanoid biosynthesis	0.0884	0.0348	2.54	1.11243e-07	1.15927e-05	LITCHI005410.m1.gene;LITCHI006810.m1.gene;LITCHI007326.m1.gene;LITCHI008478.m3.gene;LITCHI008559.m1.gene;LITCHI009873.m1.gene;LITCHI011382.m1.gene;LITCHI016426.m1.gene;LITCHI016493.m1.gene;LITCHI017676.m2.gene;LITCHI018051.m1.gene;LITCHI018055.m1.gene;LITCHI018720.m1.gene;LITCHI019103.m1.gene;LITCHI019763.m1.gene;LITCHI020189.m1.gene;LITCHI020761.m1.gene;LITCHI023108.m1.gene;LITCHI023913.m1.gene;…
ko00941	Flavonoid biosynthesis	0.0465	0.0126	3.69	4.27129e-07	2.22557e-05	LITCHI001703.m1.gene;LITCHI004234.m1.gene;LITCHI006477.m1.gene;LITCHI008559.m1.gene;LITCHI010261.m1.gene;LITCHI011187.m1.gene;LITCHI013339.m1.gene;LITCHI013343.m1.gene;LITCHI013343.m5.gene;LITCHI015108.m1.gene;LITCHI016493.m1.gene;LITCHI017676.m2.gene;LITCHI018208.m1.gene;LITCHI020852.m1.gene;LITCHI022925.m1.gene;LITCHI023381.m1.gene;LITCHI027595.m1.gene;LITCHI029356.m1.gene;LITCHI031057.m1.gene;…
ko00270	Cysteine and methionine metabolism	0.0535	0.0168	3.18	8.94915e-07	3.10865e-05	LITCHI001353.m1.gene;LITCHI001377.m4.gene;LITCHI001542.m1.gene;LITCHI003379.m1.gene;LITCHI004977.m1.gene;LITCHI005523.m1.gene;LITCHI006354.m1.gene;LITCHI008179.m1.gene;LITCHI008692.m1.gene;LITCHI011229.m1.gene;LITCHI013723.m1.gene;LITCHI014272.m1.gene;LITCHI014858.m1.gene;LITCHI014878.m1.gene;LITCHI017644.m1.gene;LITCHI018060.m1.gene;LITCHI021839.m1.gene;LITCHI021841.m1.gene;LITCHI021848.m1.gene;…
ko04075	Plant hormone signal transduction	0.1093	0.0621	1.76	0.000104129	0.00271283	LITCHI000894.m1.gene;LITCHI001382.m1.gene;LITCHI001495.m1.gene;LITCHI002779.m1.gene;LITCHI003595.m1.gene;LITCHI004487.m6.gene;LITCHI004576.m1.gene;LITCHI004576.m10.gene;LITCHI005581.m4.gene;LITCHI005675.m1.gene;LITCHI007142.m4.gene;LITCHI007163.m1.gene;LITCHI007312.m1.gene;LITCHI007836.m1.gene;LITCHI008177.m1.gene;LITCHI008378.m1.gene;LITCHI009695.m1.gene;LITCHI011182.m1.gene;LITCHI013323.m1.gene…
ko00460	Cyanoamino acid metabolism	0.0349	0.0125	2.79	0.000313114	0.00652595	LITCHI006761.m1.gene;LITCHI006763.m1.gene;LITCHI007308.m1.gene;LITCHI007743.m2.gene;LITCHI010378.m1.gene;LITCHI010719.m5.gene;LITCHI014986.m1.gene;LITCHI014991.m1.gene;LITCHI017700.m1.gene;LITCHI020189.m1.gene;LITCHI023108.m1.gene;LITCHI027044.m1.gene;LITCHI027044.m2.gene;LITCHI029547.m1.gene;LITCHI031071.m1.gene
ko00920	Sulfur metabolism	0.0209	0.0059	3.57	0.000864669	0.0150179	LITCHI007063.m10.gene;LITCHI007063.m20.gene;LITCHI013723.m1.gene;LITCHI014891.m1.gene;LITCHI014961.m1.gene;LITCHI014966.m1.gene;LITCHI019034.m1.gene;LITCHI021309.m1.gene;LITCHI029620.m1.gene
ko01230	Biosynthesis of amino acids	0.0698	0.0407	1.71	0.00283239	0.0421664	LITCHI001377.m4.gene;LITCHI001542.m1.gene;LITCHI003379.m1.gene;LITCHI003418.m1.gene;LITCHI004745.m1.gene;LITCHI006354.m1.gene;LITCHI007246.m3.gene;LITCHI007298.m1.gene;LITCHI007907.m1.gene;LITCHI008692.m1.gene;LITCHI010069.m1.gene;LITCHI010378.m1.gene;LITCHI010548.m1.gene;LITCHI010554.m1.gene;LITCHI010719.m5.gene;LITCHI013723.m1.gene;LITCHI014272.m1.gene;LITCHI014986.m1.gene;LITCHI014991.m1.gene;…
ko00260	Glycine, serine and threonine metabolism	0.0256	0.011	2.33	0.00754989	0.0983472	LITCHI001542.m1.gene;LITCHI006354.m1.gene;LITCHI010378.m1.gene;LITCHI010719.m5.gene;LITCHI014780.m1.gene;LITCHI014986.m1.gene;LITCHI014991.m1.gene;LITCHI018060.m1.gene;LITCHI022132.m1.gene;LITCHI022471.m2.gene;LITCHI029543.m1.gene
ko00062	Fatty acid elongation	0.014	0.0045	3.11	0.0121096	0.140217	LITCHI001824.m3.gene;LITCHI005522.m1.gene;LITCHI010280.m1.gene;LITCHI017426.m1.gene;LITCHI026802.m1.gene;LITCHI027970.m1.gene
ko00450	Selenocompound metabolism	0.014	0.0049	2.84	0.0185069	0.178895	LITCHI003379.m1.gene;LITCHI008692.m1.gene;LITCHI014891.m1.gene;LITCHI021839.m1.gene;LITCHI021841.m1.gene;LITCHI021848.m1.gene
ko00670	One carbon pool by folate	0.0116	0.0036	3.21	0.0188834	0.178895	LITCHI010378.m1.gene;LITCHI010719.m5.gene;LITCHI014986.m1.gene;LITCHI014991.m1.gene;LITCHI015539.m1.gene
ko04016	MAPK signaling pathway - plant	0.0721	0.05	1.44	0.0253895	0.204229	LITCHI001127.m1.gene;LITCHI001382.m1.gene;LITCHI002779.m1.gene;LITCHI003595.m1.gene;LITCHI003914.m1.gene;LITCHI004269.m1.gene;LITCHI004270.m1.gene;LITCHI005581.m4.gene;LITCHI005675.m1.gene;LITCHI006895.m1.gene;LITCHI007142.m4.gene;LITCHI011031.m1.gene;LITCHI011162.m1.gene;LITCHI015333.m1.gene;LITCHI015371.m1.gene;LITCHI016559.m1.gene;LITCHI016611.m1.gene;LITCHI018348.m1.gene;LITCHI018536.m2.gene;…
ko00942	Anthocyanin biosynthesis	0.0047	0.0006	7.7	0.025477	0.204229	LITCHI002457.m1.gene;LITCHI013091.m1.gene
ko00592	alpha-Linolenic acid metabolism	0.0163	0.0073	2.22	0.0381382	0.262167	LITCHI011378.m1.gene;LITCHI019276.m2.gene;LITCHI021330.m1.gene;LITCHI022727.m1.gene;LITCHI023912.m1.gene;LITCHI028721.m1.gene;LITCHI030220.m1.gene
ko00944	Flavone and flavonol biosynthesis	0.0093	0.003	3.08	0.0394843	0.262167	LITCHI004234.m1.gene;LITCHI011335.m1.gene;LITCHI011700.m1.gene;LITCHI023381.m1.gene
ko00400	Phenylalanine, tyrosine and tryptophan biosynthesis	0.0163	0.0074	2.19	0.0402519	0.262167	LITCHI007298.m1.gene;LITCHI007907.m1.gene;LITCHI010548.m1.gene;LITCHI027324.m1.gene;LITCHI027417.m1.gene;LITCHI029543.m1.gene;LITCHI029623.m1.gene
ko00650	Butanoate metabolism	0.0116	0.0045	2.59	0.0428281	0.262538	LITCHI005983.m1.gene;LITCHI006363.m1.gene;LITCHI008612.m1.gene;LITCHI019201.m7.gene;LITCHI021501.m1.gene
ko00950	Isoquinoline alkaloid biosynthesis	0.014	0.0064	2.19	0.05629	0.32589	LITCHI007907.m1.gene;LITCHI014780.m1.gene;LITCHI017341.m1.gene;LITCHI021084.m1.gene;LITCHI022471.m2.gene;LITCHI029245.m1.gene
ko01212	Fatty acid metabolism	0.0209	0.0116	1.8	0.0637985	0.34992	LITCHI003992.m1.gene;LITCHI004163.m1.gene;LITCHI011384.m1.gene;LITCHI014759.m2.gene;LITCHI016701.m1.gene;LITCHI019131.m1.gene;LITCHI019412.m1.gene;LITCHI021362.m1.gene;LITCHI021501.m1.gene
ko00072	Synthesis and degradation of ketone bodies	0.0047	0.001	4.49	0.0708835	0.355417	LITCHI008612.m1.gene;LITCHI021501.m1.gene
ko00061	Fatty acid biosynthesis	0.0163	0.0085	1.93	0.0716219	0.355417	LITCHI003992.m1.gene;LITCHI004163.m1.gene;LITCHI011384.m1.gene;LITCHI014759.m2.gene;LITCHI016701.m1.gene;LITCHI019412.m1.gene;LITCHI021362.m1.gene
ko00071	Fatty acid degradation	0.0163	0.0087	1.87	0.0812352	0.384798	LITCHI003008.m1.gene;LITCHI003992.m1.gene;LITCHI011378.m1.gene;LITCHI014759.m2.gene;LITCHI017389.m1.gene;LITCHI017551.m2.gene;LITCHI021501.m1.gene
ko00945	Stilbenoid, diarylheptanoid and gingerol biosynthesis	0.0116	0.0056	2.07	0.0929031	0.404407	LITCHI008559.m1.gene;LITCHI016493.m1.gene;LITCHI017676.m2.gene;LITCHI031057.m1.gene;LITCHI031804.m1.gene
ko00430	Taurine and hypotaurine metabolism	0.0047	0.0012	3.85	0.0931361	0.404407	LITCHI005983.m1.gene;LITCHI017700.m1.gene
ko01040	Biosynthesis of unsaturated fatty acids	0.007	0.0028	2.53	0.114115	0.475678	LITCHI004163.m1.gene;LITCHI011384.m1.gene;LITCHI019131.m1.gene
ko00591	Linoleic acid metabolism	0.007	0.0029	2.38	0.130607	0.523485	LITCHI003970.m1.gene;LITCHI004065.m1.gene;LITCHI030220.m1.gene
ko02010	ABC transporters	0.0209	0.0138	1.52	0.14074	0.543206	LITCHI002300.m1.gene;LITCHI005455.m1.gene;LITCHI009814.m3.gene;LITCHI017852.m1.gene;LITCHI018502.m1.gene;LITCHI019561.m1.gene;LITCHI020454.m1.gene;LITCHI020470.m1.gene;Litchi_chinensis_newGene_2277
ko00905	Brassinosteroid biosynthesis	0.007	0.0032	2.19	0.156773	0.583478	LITCHI002550.m1.gene;LITCHI005357.m1.gene;LITCHI027343.m1.gene
ko00740	Riboflavin metabolism	0.007	0.0033	2.13	0.165831	0.587901	LITCHI002507.m2.gene;LITCHI002507.m3.gene;LITCHI027987.m1.gene
ko00250	Alanine, aspartate and glutamate metabolism	0.0116	0.0068	1.71	0.169244	0.587901	LITCHI005983.m1.gene;LITCHI018060.m1.gene;LITCHI019201.m7.gene;LITCHI020527.m2.gene;LITCHI029890.m1.gene
ko00360	Phenylalanine metabolism	0.014	0.0089	1.57	0.183392	0.616497	LITCHI007907.m1.gene;LITCHI014780.m1.gene;LITCHI022471.m2.gene;LITCHI024648.m1.gene;LITCHI024649.m1.gene;LITCHI027850.m1.gene
ko00730	Thiamine metabolism	0.007	0.0036	1.93	0.203455	0.651379	LITCHI016334.m1.gene;LITCHI017198.m1.gene;LITCHI025955.m1.gene
ko00350	Tyrosine metabolism	0.014	0.0092	1.51	0.20627	0.651379	LITCHI003008.m1.gene;LITCHI007907.m1.gene;LITCHI011378.m1.gene;LITCHI014780.m1.gene;LITCHI022471.m2.gene;LITCHI029245.m1.gene
ko04070	Phosphatidylinositol signaling system	0.0186	0.0135	1.37	0.228088	0.699092	LITCHI002246.m1.gene;LITCHI007242.m3.gene;LITCHI010829.m1.gene;LITCHI011031.m1.gene;LITCHI011139.m1.gene;LITCHI011162.m1.gene;LITCHI023390.m5.gene;LITCHI028056.m3.gene
ko03440	Homologous recombination	0.0163	0.0118	1.38	0.246484	0.733893	LITCHI002004.m1.gene;LITCHI004507.m1.gene;LITCHI016336.m1.gene;LITCHI018696.m1.gene;LITCHI018698.m1.gene;LITCHI022361.m1.gene;LITCHI024864.m1.gene
ko00710	Carbon fixation in photosynthetic organisms	0.0116	0.0079	1.46	0.255653	0.734111	LITCHI001353.m1.gene;LITCHI004745.m1.gene;LITCHI018791.m1.gene;LITCHI027513.m1.gene;LITCHI029890.m1.gene
ko00590	Arachidonic acid metabolism	0.007	0.0042	1.65	0.273052	0.734111	LITCHI017389.m1.gene;LITCHI017551.m2.gene;LITCHI017700.m1.gene
ko00790	Folate biosynthesis	0.007	0.0042	1.65	0.273052	0.734111	LITCHI008740.m2.gene;LITCHI008740.m6.gene;LITCHI022942.m1.gene
ko00230	Purine metabolism	0.0209	0.0165	1.27	0.278763	0.734111	LITCHI003418.m1.gene;LITCHI007063.m10.gene;LITCHI007063.m20.gene;LITCHI010069.m1.gene;LITCHI010839.m1.gene;LITCHI014891.m1.gene;LITCHI020376.m1.gene;LITCHI027709.m6.gene;LITCHI027987.m1.gene
ko01200	Carbon metabolism	0.0512	0.0447	1.14	0.285504	0.734111	LITCHI001353.m1.gene;LITCHI001542.m1.gene;LITCHI003008.m1.gene;LITCHI003418.m1.gene;LITCHI004745.m1.gene;LITCHI006354.m1.gene;LITCHI006363.m1.gene;LITCHI007246.m3.gene;LITCHI010069.m1.gene;LITCHI010378.m1.gene;LITCHI010554.m1.gene;LITCHI010719.m5.gene;LITCHI013723.m1.gene;LITCHI014986.m1.gene;LITCHI014991.m1.gene;LITCHI015539.m1.gene;LITCHI018791.m1.gene;LITCHI019412.m1.gene;LITCHI020376.m1.gene;…
ko04146	Peroxisome	0.0209	0.0167	1.26	0.288824	0.734111	LITCHI002850.m1.gene;LITCHI003992.m1.gene;LITCHI008367.m1.gene;LITCHI008367.m3.gene;LITCHI008612.m1.gene;LITCHI009814.m3.gene;LITCHI014759.m2.gene;LITCHI020890.m1.gene;LITCHI021096.m1.gene
ko00480	Glutathione metabolism	0.0186	0.0147	1.27	0.296491	0.735654	LITCHI004977.m1.gene;LITCHI005171.m1.gene;LITCHI006437.m1.gene;LITCHI010045.m1.gene;LITCHI017700.m1.gene;LITCHI017805.m2.gene;LITCHI018518.m1.gene;LITCHI024988.m1.gene
ko00910	Nitrogen metabolism	0.0093	0.0066	1.42	0.311429	0.752312	LITCHI001244.m10.gene;LITCHI001436.m1.gene;LITCHI018672.m1.gene;LITCHI020566.m1.gene
ko04626	Plant-pathogen interaction	0.1163	0.1084	1.07	0.317643	0.752312	LITCHI001127.m1.gene;LITCHI001382.m1.gene;LITCHI001824.m3.gene;LITCHI001885.m1.gene;LITCHI002779.m1.gene;LITCHI003404.m1.gene;LITCHI003772.m1.gene;LITCHI003852.m1.gene;LITCHI004269.m1.gene;LITCHI004270.m1.gene;LITCHI005522.m1.gene;LITCHI005581.m4.gene;LITCHI005675.m1.gene;LITCHI006959.m1.gene;LITCHI009484.m1.gene;LITCHI009576.m1.gene;LITCHI009615.m1.gene;LITCHI010280.m1.gene;LITCHI011010.m1.gene;…
ko00760	Nicotinate and nicotinamide metabolism	0.007	0.0047	1.47	0.334429	0.771174	LITCHI004834.m5.gene;LITCHI020527.m2.gene;LITCHI027987.m1.gene
ko00620	Pyruvate metabolism	0.0163	0.0132	1.23	0.340407	0.771174	LITCHI001353.m1.gene;LITCHI003418.m1.gene;LITCHI006363.m1.gene;LITCHI008114.m1.gene;LITCHI010069.m1.gene;LITCHI019412.m1.gene;LITCHI021501.m1.gene
ko00280	Valine, leucine and isoleucine degradation	0.0116	0.0091	1.27	0.357578	0.792839	LITCHI001377.m4.gene;LITCHI008612.m1.gene;LITCHI018060.m1.gene;LITCHI021501.m1.gene;LITCHI022374.m1.gene
ko00310	Lysine degradation	0.0093	0.0072	1.3	0.370832	0.805096	LITCHI020836.m1.gene;LITCHI020836.m2.gene;LITCHI021501.m1.gene;LITCHI025971.m1.gene
ko00960	Tropane, piperidine and pyridine alkaloid biosynthesis	0.007	0.0054	1.28	0.415679	0.884044	LITCHI007907.m1.gene;LITCHI014780.m1.gene;LITCHI022471.m2.gene
ko00261	Monobactam biosynthesis	0.0023	0.0013	1.8	0.433002	0.897841	LITCHI014891.m1.gene
ko00196	Photosynthesis - antenna proteins	0.0023	0.0014	1.68	0.454064	0.897841	LITCHI011004.m2.gene
ko00564	Glycerophospholipid metabolism	0.0186	0.0172	1.08	0.459588	0.897841	LITCHI018244.m1.gene;LITCHI022727.m1.gene;LITCHI023081.m3.gene;LITCHI023181.m2.gene;LITCHI023390.m5.gene;LITCHI023912.m1.gene;LITCHI027694.m1.gene;LITCHI028721.m1.gene
ko00630	Glyoxylate and dicarboxylate metabolism	0.0186	0.0174	1.07	0.476408	0.897841	LITCHI001353.m1.gene;LITCHI006363.m1.gene;LITCHI009348.m1.gene;LITCHI010378.m1.gene;LITCHI010719.m5.gene;LITCHI014986.m1.gene;LITCHI014991.m1.gene;LITCHI021501.m1.gene
ko00562	Inositol phosphate metabolism	0.0163	0.0153	1.07	0.486214	0.897841	LITCHI002246.m1.gene;LITCHI007242.m3.gene;LITCHI010829.m1.gene;LITCHI011139.m1.gene;LITCHI027022.m1.gene;LITCHI028056.m3.gene;LITCHI030387.m1.gene
ko00750	Vitamin B6 metabolism	0.0023	0.0016	1.42	0.512679	0.897841	LITCHI006354.m1.gene
ko00908	Zeatin biosynthesis	0.0093	0.0087	1.07	0.519163	0.897841	LITCHI005554.m1.gene;LITCHI018706.m1.gene;LITCHI018712.m1.gene;LITCHI018713.m1.gene
ko00770	Pantothenate and CoA biosynthesis	0.007	0.0066	1.06	0.539462	0.897841	LITCHI001377.m4.gene;LITCHI026407.m3.gene;LITCHI027987.m1.gene
ko04712	Circadian rhythm - plant	0.0116	0.0114	1.02	0.545172	0.897841	LITCHI004416.m1.gene;LITCHI008890.m1.gene;LITCHI015108.m1.gene;LITCHI020852.m1.gene;LITCHI026700.m1.gene
ko00943	Isoflavonoid biosynthesis	0.0047	0.0042	1.1	0.547498	0.897841	LITCHI006963.m1.gene;LITCHI010868.m1.gene
ko00130	Ubiquinone and other terpenoid-quinone biosynthesis	0.0093	0.0091	1.02	0.557543	0.897841	LITCHI016493.m1.gene;LITCHI029374.m1.gene;LITCHI031057.m1.gene;LITCHI031673.m2.gene
ko00410	beta-Alanine metabolism	0.007	0.007	1	0.582938	0.897841	LITCHI005983.m1.gene;LITCHI014780.m1.gene;LITCHI022471.m2.gene
ko00909	Sesquiterpenoid and triterpenoid biosynthesis	0.0116	0.0124	0.94	0.622828	0.897841	LITCHI022586.m1.gene;LITCHI025238.m1.gene;LITCHI031160.m1.gene;LITCHI031167.m1.gene;Litchi_chinensis_newGene_911
ko04130	SNARE interactions in vesicular transport	0.0047	0.0049	0.95	0.630182	0.897841	LITCHI013849.m1.gene;LITCHI013850.m1.gene
ko03030	DNA replication	0.007	0.0075	0.93	0.631545	0.897841	LITCHI001887.m1.gene;LITCHI008346.m3.gene;LITCHI026552.m1.gene
ko00402	Benzoxazinoid biosynthesis	0.0023	0.0024	0.96	0.653459	0.897841	LITCHI025005.m1.gene
ko00902	Monoterpenoid biosynthesis	0.0023	0.0025	0.93	0.666346	0.897841	LITCHI025582.m1.gene
ko00240	Pyrimidine metabolism	0.0093	0.0106	0.88	0.674473	0.897841	LITCHI005411.m1.gene;LITCHI009820.m1.gene;LITCHI026989.m1.gene;LITCHI027987.m1.gene
ko00603	Glycosphingolipid biosynthesis - globo and isoglobo series	0.0023	0.0026	0.9	0.678755	0.897841	LITCHI030708.m1.gene
ko00966	Glucosinolate biosynthesis	0.0023	0.0028	0.84	0.702208	0.897841	LITCHI001377.m4.gene
ko00513	Various types of N-glycan biosynthesis	0.0047	0.0057	0.82	0.708604	0.897841	LITCHI007999.m1.gene;LITCHI030708.m1.gene
ko00904	Diterpenoid biosynthesis	0.0047	0.0057	0.82	0.708604	0.897841	LITCHI017070.m1.gene;Litchi_chinensis_newGene_2670
ko00500	Starch and sucrose metabolism	0.0372	0.0415	0.9	0.710151	0.897841	LITCHI001804.m3.gene;LITCHI007960.m1.gene;LITCHI009110.m1.gene;LITCHI010462.m1.gene;LITCHI011894.m6.gene;LITCHI011904.m1.gene;LITCHI012030.m1.gene;LITCHI012687.m2.gene;LITCHI020189.m1.gene;LITCHI023108.m1.gene;LITCHI027044.m1.gene;LITCHI027044.m2.gene;LITCHI027733.m1.gene;LITCHI027987.m1.gene;LITCHI028558.m1.gene;LITCHI029547.m1.gene
ko00010	Glycolysis / Gluconeogenesis	0.0233	0.0267	0.87	0.715485	0.897841	LITCHI003008.m1.gene;LITCHI003418.m1.gene;LITCHI004745.m1.gene;LITCHI006363.m1.gene;LITCHI007246.m3.gene;LITCHI010069.m1.gene;LITCHI010554.m1.gene;LITCHI011378.m1.gene;LITCHI018791.m1.gene;LITCHI021990.m1.gene
ko00780	Biotin metabolism	0.0023	0.003	0.77	0.734224	0.897841	LITCHI009041.m1.gene
ko00561	Glycerolipid metabolism	0.014	0.0168	0.83	0.735458	0.897841	LITCHI013943.m1.gene;LITCHI018244.m1.gene;LITCHI023390.m5.gene;LITCHI024538.m1.gene;LITCHI027381.m2.gene;LITCHI027694.m1.gene
ko00906	Carotenoid biosynthesis	0.007	0.0091	0.76	0.758668	0.897841	LITCHI002053.m1.gene;LITCHI018927.m1.gene;LITCHI019764.m1.gene
ko00640	Propanoate metabolism	0.0047	0.0063	0.74	0.759579	0.897841	LITCHI019412.m1.gene;LITCHI021501.m1.gene
ko00053	Ascorbate and aldarate metabolism	0.007	0.0095	0.74	0.780384	0.897841	LITCHI006437.m1.gene;LITCHI010727.m1.gene;LITCHI030387.m1.gene
ko00860	Porphyrin and chlorophyll metabolism	0.007	0.0098	0.71	0.800468	0.897841	LITCHI004353.m1.gene;LITCHI005329.m1.gene;LITCHI016758.m1.gene
ko00965	Betalain biosynthesis	0.0023	0.0038	0.61	0.811093	0.897841	LITCHI011652.m1.gene
ko00340	Histidine metabolism	0.0023	0.0039	0.6	0.818128	0.897841	LITCHI025875.m1.gene
ko00052	Galactose metabolism	0.014	0.0187	0.75	0.821046	0.897841	LITCHI004169.m1.gene;LITCHI004173.m1.gene;LITCHI004930.m1.gene;LITCHI007246.m3.gene;LITCHI010554.m1.gene;LITCHI026586.m1.gene
ko00380	Tryptophan metabolism	0.007	0.0103	0.68	0.823388	0.897841	LITCHI002149.m1.gene;LITCHI017116.m1.gene;LITCHI021501.m1.gene
ko00290	Valine, leucine and isoleucine biosynthesis	0.0023	0.0041	0.57	0.831423	0.897841	LITCHI001377.m4.gene
ko00511	Other glycan degradation	0.007	0.0104	0.67	0.831909	0.897841	LITCHI004843.m1.gene;LITCHI020620.m1.gene;LITCHI030708.m1.gene
ko00604	Glycosphingolipid biosynthesis - ganglio series	0.0023	0.0042	0.55	0.843748	0.897841	LITCHI030708.m1.gene
ko00040	Pentose and glucuronate interconversions	0.0186	0.0256	0.73	0.866101	0.897841	LITCHI009646.m1.gene;LITCHI010727.m1.gene;LITCHI017488.m1.gene;LITCHI020650.m1.gene;LITCHI025887.m1.gene;LITCHI025891.m1.gene;LITCHI029597.m1.gene;Litchi_chinensis_newGene_1942
ko00900	Terpenoid backbone biosynthesis	0.0047	0.0082	0.57	0.872618	0.897841	LITCHI016334.m1.gene;LITCHI021501.m1.gene
ko00030	Pentose phosphate pathway	0.0093	0.0146	0.64	0.877868	0.897841	LITCHI007246.m3.gene;LITCHI010554.m1.gene;LITCHI018791.m1.gene;LITCHI020376.m1.gene
ko00051	Fructose and mannose metabolism	0.0093	0.0147	0.63	0.88068	0.897841	LITCHI006494.m1.gene;LITCHI007246.m3.gene;LITCHI010554.m1.gene;LITCHI018791.m1.gene
ko00330	Arginine and proline metabolism	0.0047	0.0085	0.55	0.883537	0.897841	LITCHI004977.m1.gene;LITCHI010045.m1.gene
ko00220	Arginine biosynthesis	0.0023	0.005	0.46	0.888987	0.897841	LITCHI029890.m1.gene
ko03020	RNA polymerase	0.0023	0.0051	0.46	0.893126	0.897841	LITCHI010153.m1.gene
ko03060	Protein export	0.0047	0.009	0.52	0.902825	0.897841	LITCHI011102.m10.gene;LITCHI028974.m10.gene
ko00520	Amino sugar and nucleotide sugar metabolism	0.0186	0.0284	0.66	0.925874	0.897841	LITCHI006494.m1.gene;LITCHI010727.m1.gene;LITCHI015503.m1.gene;LITCHI016272.m1.gene;LITCHI019379.m1.gene;LITCHI026453.m1.gene;LITCHI026454.m1.gene;LITCHI030708.m1.gene
ko03430	Mismatch repair	0.0023	0.006	0.39	0.926925	0.897841	LITCHI008346.m3.gene
ko00531	Glycosaminoglycan degradation	0.0023	0.0061	0.38	0.932277	0.897841	LITCHI030708.m1.gene
ko04120	Ubiquitin mediated proteolysis	0.014	0.0229	0.61	0.933616	0.897841	LITCHI001591.m1.gene;LITCHI006422.m1.gene;LITCHI018980.m1.gene;LITCHI024583.m1.gene;LITCHI024583.m2.gene;Litchi_chinensis_newGene_1034
ko00020	Citrate cycle (TCA cycle)	0.0047	0.0104	0.45	0.942494	0.897841	LITCHI001353.m1.gene;LITCHI004917.m1.gene
ko00600	Sphingolipid metabolism	0.0047	0.0104	0.45	0.942494	0.897841	LITCHI029702.m1.gene;LITCHI029705.m1.gene
ko03010	Ribosome	0.0209	0.0328	0.64	0.94698	0.897841	LITCHI005219.m1.gene;LITCHI006487.m1.gene;LITCHI017406.m1.gene;LITCHI025538.m1.gene;LITCHI027125.m6.gene;LITCHI030969.m1.gene;LITCHI030969.m2.gene;LITCHI030969.m5.gene;Litchi_chinensis_newGene_1124
ko04145	Phagosome	0.0047	0.0115	0.41	0.960642	0.897841	LITCHI022113.m1.gene;LITCHI028974.m10.gene
ko03410	Base excision repair	0.0023	0.0075	0.31	0.963168	0.897841	LITCHI008346.m3.gene
ko00073	Cutin, suberine and wax biosynthesis	0.0023	0.0079	0.29	0.969557	0.897841	LITCHI012511.m3.gene
ko03022	Basal transcription factors	0.0023	0.0079	0.29	0.969557	0.897841	LITCHI030149.m1.gene
ko03050	Proteasome	0.0047	0.0124	0.37	0.97235	0.897841	LITCHI016096.m1.gene;LITCHI022361.m1.gene
ko01210	2-Oxocarboxylic acid metabolism	0.0047	0.0131	0.35	0.978674	0.897841	LITCHI001377.m4.gene;LITCHI029890.m1.gene
ko03018	RNA degradation	0.0093	0.0205	0.45	0.978811	0.897841	LITCHI007246.m3.gene;LITCHI010554.m1.gene;LITCHI023192.m1.gene;LITCHI023192.m2.gene
ko03008	Ribosome biogenesis in eukaryotes	0.007	0.0173	0.4	0.981382	0.897841	LITCHI004416.m1.gene;LITCHI008890.m1.gene;LITCHI009039.m1.gene
ko03420	Nucleotide excision repair	0.0023	0.0093	0.25	0.983462	0.897841	LITCHI008346.m3.gene
ko00970	Aminoacyl-tRNA biosynthesis	0.0047	0.014	0.33	0.984633	0.897841	LITCHI014515.m1.gene;LITCHI018192.m1.gene
ko03013	RNA transport	0.0116	0.0316	0.37	0.998084	0.897841	LITCHI015533.m2.gene;LITCHI015815.m1.gene;LITCHI016624.m3.gene;LITCHI020265.m1.gene;LITCHI022948.m1.gene
ko00190	Oxidative phosphorylation	0.0023	0.0149	0.16	0.998626	0.897841	LITCHI001702.m1.gene
ko03040	Spliceosome	0.0116	0.0336	0.35	0.999015	0.897841	LITCHI001614.m1.gene;LITCHI007728.m1.gene;LITCHI013778.m1.gene;LITCHI019237.m1.gene;LITCHI028562.m1.gene
ko04144	Endocytosis	0.0093	0.0303	0.31	0.999217	0.897841	LITCHI004947.m1.gene;LITCHI017114.m1.gene;LITCHI020256.m4.gene;LITCHI029803.m1.gene
ko04141	Protein processing in endoplasmic reticulum	0.014	0.0389	0.36	0.999415	0.897841	LITCHI006422.m1.gene;LITCHI013154.m1.gene;LITCHI018305.m1.gene;LITCHI022989.m1.gene;LITCHI028974.m10.gene;LITCHI029915.m4.gene

## Sheet: DEmRNAs in leaves
Table S3. KEGG pathway assignments for DEmRNAs in leaves
ID	Description	GeneRatio	BgRatio	enrich_factor	pvalue	qvalue	geneID
ko00196	Photosynthesis - antenna proteins	0.017	0.0014	12.33	6.89948e-09	7.91625e-07	LITCHI001179.m1.gene;LITCHI004662.m1.gene;LITCHI012016.m1.gene;LITCHI013252.m1.gene;LITCHI018231.m1.gene;LITCHI021457.m1.gene;LITCHI023456.m1.gene;LITCHI027867.m1.gene;LITCHI028856.m1.gene
ko00195	Photosynthesis	0.0265	0.0056	4.72	1.01836e-06	5.84216e-05	LITCHI006468.m1.gene;LITCHI006733.m1.gene;LITCHI010048.m1.gene;LITCHI011244.m1.gene;LITCHI011584.m1.gene;LITCHI012558.m1.gene;LITCHI013501.m1.gene;LITCHI024395.m1.gene;LITCHI025919.m1.gene;LITCHI026220.m1.gene;LITCHI028001.m1.gene;LITCHI028705.m2.gene;LITCHI030580.m1.gene;LITCHI030585.m1.gene
ko00940	Phenylpropanoid biosynthesis	0.0718	0.0348	2.07	1.69916e-05	0.000649853	LITCHI001132.m1.gene;LITCHI001530.m1.gene;LITCHI001586.m1.gene;LITCHI002320.m1.gene;LITCHI003366.m1.gene;LITCHI004342.m1.gene;LITCHI004424.m1.gene;LITCHI006686.m1.gene;LITCHI006810.m1.gene;LITCHI007326.m1.gene;LITCHI007653.m1.gene;LITCHI007653.m5.gene;LITCHI012081.m1.gene;LITCHI013330.m1.gene;LITCHI016426.m1.gene;LITCHI018055.m1.gene;LITCHI018600.m1.gene;LITCHI020761.m1.gene;LITCHI020906.m1.gene;…
ko00270	Cysteine and methionine metabolism	0.0359	0.0168	2.13	0.00148786	0.0426781	LITCHI001514.m1.gene;LITCHI001542.m1.gene;LITCHI002275.m1.gene;LITCHI003719.m1.gene;LITCHI005872.m1.gene;LITCHI006354.m1.gene;LITCHI007120.m1.gene;LITCHI008692.m1.gene;LITCHI010771.m10.gene;LITCHI011229.m1.gene;LITCHI014637.m1.gene;LITCHI021839.m1.gene;LITCHI021841.m1.gene;LITCHI021848.m1.gene;LITCHI025738.m1.gene;LITCHI025775.m1.gene;LITCHI026665.m1.gene;LITCHI029670.m1.gene;LITCHI030207.m1.gene
ko02010	ABC transporters	0.0284	0.0138	2.05	0.00643035	0.14756	LITCHI007420.m1.gene;LITCHI010096.m1.gene;LITCHI012385.m1.gene;LITCHI014268.m3.gene;LITCHI016696.m1.gene;LITCHI017962.m1.gene;LITCHI018804.m1.gene;LITCHI020375.m1.gene;LITCHI020470.m1.gene;LITCHI022178.m1.gene;LITCHI022179.m1.gene;LITCHI026684.m1.gene;LITCHI027956.m1.gene;LITCHI030483.m1.gene;Litchi_chinensis_newGene_6880
ko00860	Porphyrin and chlorophyll metabolism	0.0208	0.0098	2.11	0.0149056	0.285036	LITCHI005329.m1.gene;LITCHI008501.m1.gene;LITCHI008866.m1.gene;LITCHI008874.m1.gene;LITCHI011077.m2.gene;LITCHI013195.m1.gene;LITCHI021077.m1.gene;LITCHI022931.m1.gene;LITCHI024281.m1.gene;LITCHI024296.m1.gene;LITCHI031105.m1.gene
ko00943	Isoflavonoid biosynthesis	0.0113	0.0042	2.68	0.0232501	0.381092	LITCHI006751.m1.gene;LITCHI006963.m1.gene;LITCHI014755.m1.gene;LITCHI019347.m1.gene;LITCHI019348.m1.gene;LITCHI021135.m1.gene
ko00920	Sulfur metabolism	0.0132	0.0059	2.26	0.03482	0.499393	LITCHI003719.m1.gene;LITCHI007060.m1.gene;LITCHI007063.m20.gene;LITCHI014961.m1.gene;LITCHI019034.m1.gene;LITCHI025738.m1.gene;LITCHI029620.m1.gene
ko00750	Vitamin B6 metabolism	0.0057	0.0016	3.46	0.053167	0.677802	LITCHI006354.m1.gene;LITCHI024662.m1.gene;LITCHI030630.m1.gene
ko00960	Tropane, piperidine and pyridine alkaloid biosynthesis	0.0113	0.0054	2.09	0.0667445	0.704218	LITCHI004876.m1.gene;LITCHI007907.m2.gene;LITCHI024964.m1.gene;LITCHI024965.m1.gene;LITCHI024968.m1.gene;LITCHI024969.m1.gene
ko00591	Linoleic acid metabolism	0.0076	0.0029	2.58	0.0675145	0.704218	LITCHI004065.m1.gene;LITCHI014768.m1.gene;LITCHI024090.m1.gene;LITCHI030220.m1.gene
ko00230	Purine metabolism	0.0246	0.0165	1.49	0.0977681	0.916843	LITCHI000600.m1.gene;LITCHI002402.m1.gene;LITCHI002929.m1.gene;LITCHI007060.m1.gene;LITCHI007063.m20.gene;LITCHI010839.m1.gene;LITCHI015395.m2.gene;LITCHI018602.m1.gene;LITCHI021934.m1.gene;LITCHI022500.m1.gene;LITCHI025275.m1.gene;LITCHI027705.m1.gene;LITCHI027987.m1.gene
ko00564	Glycerophospholipid metabolism	0.0246	0.0172	1.43	0.123256	0.916843	LITCHI005655.m1.gene;LITCHI008746.m1.gene;LITCHI010049.m1.gene;LITCHI010050.m1.gene;LITCHI013258.m1.gene;LITCHI018244.m1.gene;LITCHI020795.m1.gene;LITCHI022500.m1.gene;LITCHI022938.m1.gene;LITCHI023360.m5.gene;LITCHI025118.m1.gene;LITCHI025729.m1.gene;LITCHI028721.m1.gene
ko00460	Cyanoamino acid metabolism	0.0189	0.0125	1.51	0.126548	0.916843	LITCHI001688.m1.gene;LITCHI003366.m1.gene;LITCHI004342.m1.gene;LITCHI006766.m1.gene;LITCHI007196.m1.gene;LITCHI010719.m1.gene;LITCHI013330.m1.gene;LITCHI023108.m1.gene;LITCHI025738.m1.gene;LITCHI031619.m1.gene
ko00073	Cutin, suberine and wax biosynthesis	0.0132	0.0079	1.67	0.126702	0.916843	LITCHI001584.m1.gene;LITCHI012511.m4.gene;LITCHI022092.m1.gene;LITCHI024478.m1.gene;LITCHI025287.m1.gene;LITCHI029559.m1.gene;LITCHI030125.m1.gene
ko00402	Benzoxazinoid biosynthesis	0.0057	0.0024	2.35	0.133678	0.916843	LITCHI015346.m1.gene;LITCHI015348.m1.gene;LITCHI015356.m1.gene
ko00965	Betalain biosynthesis	0.0076	0.0038	1.99	0.139705	0.916843	LITCHI000999.m1.gene;LITCHI005175.m1.gene;LITCHI005209.m1.gene;LITCHI010282.m1.gene
ko00902	Monoterpenoid biosynthesis	0.0057	0.0025	2.27	0.144344	0.916843	LITCHI007192.m1.gene;LITCHI022907.m1.gene;LITCHI025666.m1.gene
ko00061	Fatty acid biosynthesis	0.0132	0.0085	1.57	0.160014	0.916843	LITCHI001741.m1.gene;LITCHI001741.m2.gene;LITCHI004015.m1.gene;LITCHI005008.m1.gene;LITCHI021362.m1.gene;LITCHI030556.m1.gene;LITCHI030560.m1.gene
ko01212	Fatty acid metabolism	0.017	0.0116	1.46	0.163924	0.916843	LITCHI001741.m1.gene;LITCHI001741.m2.gene;LITCHI004015.m1.gene;LITCHI005008.m1.gene;LITCHI019131.m1.gene;LITCHI021362.m1.gene;LITCHI024832.m2.gene;LITCHI030556.m1.gene;LITCHI030560.m1.gene
ko00511	Other glycan degradation	0.0151	0.0104	1.45	0.187923	0.916843	LITCHI004839.m1.gene;LITCHI004841.m1.gene;LITCHI006542.m1.gene;LITCHI016820.m14.gene;LITCHI022558.m1.gene;LITCHI024725.m1.gene;LITCHI026165.m1.gene;LITCHI029072.m1.gene
ko00592	alpha-Linolenic acid metabolism	0.0113	0.0073	1.55	0.191613	0.916843	LITCHI001739.m1.gene;LITCHI011121.m1.gene;LITCHI011712.m1.gene;LITCHI024090.m1.gene;LITCHI028721.m1.gene;LITCHI030220.m1.gene
ko00400	Phenylalanine, tyrosine and tryptophan biosynthesis	0.0113	0.0074	1.53	0.198684	0.916843	LITCHI002682.m1.gene;LITCHI003790.m1.gene;LITCHI007907.m2.gene;LITCHI010548.m1.gene;LITCHI024511.m1.gene;LITCHI031811.m1.gene
ko00601	Glycosphingolipid biosynthesis - lacto and neolacto series	0.0019	0.0004	4.38	0.208327	0.916843	LITCHI018238.m1.gene
ko00062	Fatty acid elongation	0.0076	0.0045	1.69	0.212261	0.916843	LITCHI001824.m2.gene;LITCHI014915.m1.gene;LITCHI016536.m1.gene;LITCHI024832.m2.gene
ko00944	Flavone and flavonol biosynthesis	0.0057	0.003	1.88	0.213266	0.916843	LITCHI019347.m1.gene;LITCHI019348.m1.gene;LITCHI021135.m1.gene
ko00531	Glycosaminoglycan degradation	0.0095	0.0061	1.54	0.222894	0.916843	LITCHI006542.m1.gene;LITCHI014496.m1.gene;LITCHI017277.m1.gene;LITCHI024725.m1.gene;LITCHI026165.m1.gene
ko00260	Glycine, serine and threonine metabolism	0.0151	0.011	1.38	0.223743	0.916843	LITCHI001542.m1.gene;LITCHI004876.m1.gene;LITCHI005872.m1.gene;LITCHI006354.m1.gene;LITCHI007196.m1.gene;LITCHI010719.m1.gene;LITCHI016562.m1.gene;LITCHI022943.m1.gene
ko00710	Carbon fixation in photosynthetic organisms	0.0113	0.0079	1.43	0.242972	0.925258	LITCHI009933.m1.gene;LITCHI017210.m1.gene;LITCHI020876.m1.gene;LITCHI020928.m1.gene;LITCHI027517.m1.gene;LITCHI027718.m1.gene
ko00520	Amino sugar and nucleotide sugar metabolism	0.034	0.0284	1.2	0.245903	0.925258	LITCHI003640.m1.gene;LITCHI006364.m1.gene;LITCHI015486.m1.gene;LITCHI015498.m1.gene;LITCHI015500.m1.gene;LITCHI015503.m1.gene;LITCHI015504.m1.gene;LITCHI015508.m1.gene;LITCHI016163.m1.gene;LITCHI016177.m1.gene;LITCHI016270.m1.gene;LITCHI016272.m1.gene;LITCHI016273.m1.gene;LITCHI018491.m1.gene;LITCHI026453.m1.gene;LITCHI026454.m1.gene;LITCHI026513.m1.gene;Litchi_chinensis_newGene_2446
ko00740	Riboflavin metabolism	0.0057	0.0033	1.73	0.24999	0.925258	LITCHI005947.m2.gene;LITCHI023016.m1.gene;LITCHI027987.m1.gene
ko00450	Selenocompound metabolism	0.0076	0.0049	1.54	0.261968	0.939291	LITCHI008692.m1.gene;LITCHI021839.m1.gene;LITCHI021841.m1.gene;LITCHI021848.m1.gene
ko00500	Starch and sucrose metabolism	0.0473	0.0415	1.14	0.27778	0.965807	LITCHI002439.m1.gene;LITCHI002564.m1.gene;LITCHI002829.m1.gene;LITCHI003366.m1.gene;LITCHI004342.m1.gene;LITCHI005830.m1.gene;LITCHI007958.m1.gene;LITCHI008776.m1.gene;LITCHI008779.m1.gene;LITCHI010993.m1.gene;LITCHI011940.m1.gene;LITCHI013330.m1.gene;LITCHI014384.m1.gene;LITCHI015013.m1.gene;LITCHI021944.m2.gene;LITCHI023108.m1.gene;LITCHI025933.m1.gene;LITCHI027733.m1.gene;LITCHI027987.m1.gene;…
ko00514	Other types of O-glycan biosynthesis	0.0038	0.0022	1.75	0.317136	0.980554	LITCHI005707.m1.gene;LITCHI025323.m1.gene
ko00565	Ether lipid metabolism	0.0076	0.0056	1.35	0.344999	0.980554	LITCHI010049.m1.gene;LITCHI010050.m1.gene;LITCHI022938.m1.gene;LITCHI025118.m1.gene
ko03430	Mismatch repair	0.0076	0.006	1.27	0.386946	0.980554	LITCHI008346.m1.gene;LITCHI022539.m1.gene;LITCHI028926.m3.gene;Litchi_chinensis_newGene_1308
ko00604	Glycosphingolipid biosynthesis - ganglio series	0.0057	0.0042	1.34	0.388562	0.980554	LITCHI006542.m1.gene;LITCHI024725.m1.gene;LITCHI026165.m1.gene
ko00901	Indole alkaloid biosynthesis	0.0019	0.0009	1.99	0.401944	0.980554	LITCHI005416.m1.gene
ko01230	Biosynthesis of amino acids	0.0435	0.0407	1.07	0.402987	0.980554	LITCHI001542.m1.gene;LITCHI002682.m1.gene;LITCHI003719.m1.gene;LITCHI003790.m1.gene;LITCHI005872.m1.gene;LITCHI006354.m1.gene;LITCHI007076.m6.gene;LITCHI007196.m1.gene;LITCHI007907.m2.gene;LITCHI008692.m1.gene;LITCHI010548.m1.gene;LITCHI010719.m1.gene;LITCHI010771.m10.gene;LITCHI011549.m1.gene;LITCHI021718.m1.gene;LITCHI024511.m1.gene;LITCHI025161.m1.gene;LITCHI025738.m1.gene;LITCHI026665.m1.gene…
ko03022	Basal transcription factors	0.0095	0.0079	1.19	0.410935	0.980554	LITCHI001328.m1.gene;LITCHI005653.m1.gene;LITCHI010723.m1.gene;LITCHI022476.m1.gene;LITCHI026296.m2.gene
ko00650	Butanoate metabolism	0.0057	0.0045	1.26	0.425749	0.980554	LITCHI006363.m1.gene;LITCHI014398.m1.gene;LITCHI019201.m6.gene
ko04626	Plant-pathogen interaction	0.1115	0.1084	1.03	0.426585	0.980554	LITCHI000055.m1.gene;LITCHI001136.m1.gene;LITCHI001382.m1.gene;LITCHI001383.m1.gene;LITCHI001824.m2.gene;LITCHI003762.m1.gene;LITCHI003767.m1.gene;LITCHI003838.m1.gene;LITCHI004005.m1.gene;LITCHI004367.m1.gene;LITCHI004600.m1.gene;LITCHI005541.m1.gene;LITCHI005675.m1.gene;LITCHI008804.m1.gene;LITCHI009568.m1.gene;LITCHI009574.m1.gene;LITCHI009576.m1.gene;LITCHI009615.m1.gene;LITCHI009692.m8.gene;…
ko01040	Biosynthesis of unsaturated fatty acids	0.0038	0.0028	1.37	0.432685	0.980554	LITCHI019131.m1.gene;LITCHI024832.m2.gene
ko00630	Glyoxylate and dicarboxylate metabolism	0.0189	0.0174	1.08	0.442287	0.980554	LITCHI006363.m1.gene;LITCHI007196.m1.gene;LITCHI009348.m1.gene;LITCHI009991.m6.gene;LITCHI010719.m1.gene;LITCHI014398.m1.gene;LITCHI016562.m1.gene;LITCHI021265.m1.gene;LITCHI023089.m1.gene;LITCHI028774.m1.gene
ko04075	Plant hormone signal transduction	0.0643	0.0621	1.03	0.443489	0.980554	LITCHI000894.m1.gene;LITCHI001382.m1.gene;LITCHI001383.m1.gene;LITCHI001495.m1.gene;LITCHI004564.m4.gene;LITCHI005647.m1.gene;LITCHI005675.m1.gene;LITCHI006416.m1.gene;LITCHI006500.m1.gene;LITCHI006903.m1.gene;LITCHI006968.m1.gene;LITCHI009025.m1.gene;LITCHI009073.m1.gene;LITCHI009692.m8.gene;LITCHI010490.m1.gene;LITCHI010679.m1.gene;LITCHI011182.m1.gene;LITCHI012773.m1.gene;LITCHI015371.m3.gene;…
ko00910	Nitrogen metabolism	0.0076	0.0066	1.15	0.459238	0.980554	LITCHI001436.m1.gene;LITCHI004943.m1.gene;LITCHI004943.m5.gene;LITCHI015258.m1.gene
ko00908	Zeatin biosynthesis	0.0095	0.0087	1.08	0.491689	0.980554	LITCHI008772.m1.gene;LITCHI010540.m1.gene;LITCHI014695.m1.gene;LITCHI018616.m1.gene;LITCHI027610.m1.gene
ko00240	Pyrimidine metabolism	0.0113	0.0106	1.07	0.493395	0.980554	LITCHI000600.m1.gene;LITCHI005411.m1.gene;LITCHI015285.m1.gene;LITCHI021934.m1.gene;LITCHI026989.m1.gene;LITCHI027987.m1.gene
ko00261	Monobactam biosynthesis	0.0019	0.0013	1.46	0.503976	0.980554	LITCHI005872.m1.gene
ko00905	Brassinosteroid biosynthesis	0.0038	0.0032	1.18	0.508566	0.980554	LITCHI019951.m1.gene;LITCHI030056.m1.gene
ko03040	Spliceosome	0.034	0.0336	1.01	0.510979	0.980554	LITCHI005283.m10.gene;LITCHI005283.m4.gene;LITCHI007728.m1.gene;LITCHI013516.m1.gene;LITCHI013517.m2.gene;LITCHI014338.m1.gene;LITCHI015557.m1.gene;LITCHI020129.m1.gene;LITCHI020245.m1.gene;LITCHI020315.m1.gene;LITCHI020838.m1.gene;LITCHI023850.m1.gene;LITCHI024191.m1.gene;LITCHI026756.m1.gene;LITCHI027837.m2.gene;LITCHI028583.m1.gene;Litchi_chinensis_newGene_3146;Litchi_chinensis_newGene_5344
ko00280	Valine, leucine and isoleucine degradation	0.0095	0.0091	1.03	0.534805	0.980554	LITCHI004176.m1.gene;LITCHI010542.m1.gene;LITCHI010771.m10.gene;LITCHI030556.m1.gene;LITCHI030560.m1.gene
ko00350	Tyrosine metabolism	0.0095	0.0092	1.02	0.54323	0.980554	LITCHI004876.m1.gene;LITCHI007907.m2.gene;LITCHI010022.m1.gene;LITCHI021923.m1.gene;LITCHI029245.m1.gene
ko03030	DNA replication	0.0076	0.0075	1.01	0.565933	0.980554	LITCHI004741.m1.gene;LITCHI008346.m1.gene;LITCHI022539.m1.gene;Litchi_chinensis_newGene_1308
ko00670	One carbon pool by folate	0.0038	0.0036	1.04	0.577511	0.980554	LITCHI007196.m1.gene;LITCHI010719.m1.gene
ko00730	Thiamine metabolism	0.0038	0.0036	1.04	0.577511	0.980554	LITCHI027346.m1.gene;LITCHI029534.m1.gene
ko01200	Carbon metabolism	0.0435	0.0447	0.97	0.586058	0.980554	LITCHI001542.m1.gene;LITCHI003719.m1.gene;LITCHI004176.m1.gene;LITCHI006354.m1.gene;LITCHI006363.m1.gene;LITCHI007196.m1.gene;LITCHI009933.m1.gene;LITCHI009991.m6.gene;LITCHI010022.m1.gene;LITCHI010719.m1.gene;LITCHI014398.m1.gene;LITCHI016562.m1.gene;LITCHI017210.m1.gene;LITCHI020277.m1.gene;LITCHI020680.m1.gene;LITCHI020876.m1.gene;LITCHI020928.m1.gene;LITCHI021265.m1.gene;LITCHI021718.m1.gene;…
ko00290	Valine, leucine and isoleucine biosynthesis	0.0038	0.0041	0.93	0.639111	0.980554	LITCHI010771.m10.gene;LITCHI011549.m1.gene
ko00600	Sphingolipid metabolism	0.0095	0.0104	0.91	0.652689	0.980554	LITCHI006542.m1.gene;LITCHI006815.m3.gene;LITCHI024725.m1.gene;LITCHI026165.m1.gene;LITCHI029288.m1.gene
ko00660	C5-Branched dibasic acid metabolism	0.0019	0.002	0.95	0.658855	0.980554	LITCHI011549.m1.gene
ko04146	Peroxisome	0.0151	0.0167	0.91	0.660192	0.980554	LITCHI001741.m1.gene;LITCHI001741.m2.gene;LITCHI004015.m1.gene;LITCHI008367.m3.gene;LITCHI009991.m6.gene;LITCHI024478.m1.gene;LITCHI024579.m1.gene;LITCHI028774.m1.gene
ko00790	Folate biosynthesis	0.0038	0.0042	0.89	0.661698	0.980554	LITCHI008740.m2.gene;LITCHI020211.m1.gene
ko00950	Isoquinoline alkaloid biosynthesis	0.0057	0.0064	0.89	0.662967	0.980554	LITCHI004876.m1.gene;LITCHI007907.m2.gene;LITCHI029245.m1.gene
ko00561	Glycerolipid metabolism	0.0151	0.0168	0.9	0.671458	0.980554	LITCHI003501.m1.gene;LITCHI005655.m1.gene;LITCHI011729.m1.gene;LITCHI013258.m1.gene;LITCHI018244.m1.gene;LITCHI018342.m1.gene;LITCHI025729.m1.gene;LITCHI030432.m1.gene
ko00563	Glycosylphosphatidylinositol (GPI)-anchor biosynthesis	0.0038	0.0043	0.88	0.672559	0.980554	LITCHI010129.m1.gene;LITCHI027853.m1.gene
ko00071	Fatty acid degradation	0.0076	0.0087	0.87	0.683091	0.980554	LITCHI001741.m1.gene;LITCHI001741.m2.gene;LITCHI004015.m1.gene;LITCHI010022.m1.gene
ko00300	Lysine biosynthesis	0.0019	0.0022	0.88	0.689344	0.980554	LITCHI005872.m1.gene
ko00360	Phenylalanine metabolism	0.0076	0.0089	0.85	0.697876	0.980554	LITCHI004876.m1.gene;LITCHI007907.m2.gene;LITCHI018600.m1.gene;LITCHI027850.m1.gene
ko00562	Inositol phosphate metabolism	0.0132	0.0153	0.87	0.703795	0.980554	LITCHI001405.m3.gene;LITCHI015367.m1.gene;LITCHI018683.m10.gene;LITCHI020450.m4.gene;LITCHI025118.m1.gene;LITCHI027022.m6.gene;LITCHI027718.m1.gene
ko00620	Pyruvate metabolism	0.0113	0.0132	0.86	0.704713	0.980554	LITCHI006363.m1.gene;LITCHI008114.m1.gene;LITCHI014398.m1.gene;LITCHI017210.m1.gene;LITCHI020277.m1.gene;LITCHI020928.m1.gene
ko00250	Alanine, aspartate and glutamate metabolism	0.0057	0.0068	0.83	0.705794	0.980554	LITCHI019201.m6.gene;LITCHI020527.m2.gene;LITCHI025161.m1.gene
ko04016	MAPK signaling pathway - plant	0.0454	0.05	0.91	0.718819	0.980554	LITCHI001382.m1.gene;LITCHI001383.m1.gene;LITCHI005555.m1.gene;LITCHI005675.m1.gene;LITCHI006364.m1.gene;LITCHI009692.m8.gene;LITCHI009991.m6.gene;LITCHI010679.m1.gene;LITCHI012625.m1.gene;LITCHI015257.m1.gene;LITCHI015371.m3.gene;LITCHI017609.m1.gene;LITCHI019619.m4.gene;LITCHI021934.m1.gene;LITCHI022184.m1.gene;LITCHI022184.m2.gene;LITCHI025706.m1.gene;LITCHI025775.m1.gene;LITCHI026977.m2.gene;…
ko00760	Nicotinate and nicotinamide metabolism	0.0038	0.0047	0.8	0.722668	0.980554	LITCHI020527.m2.gene;LITCHI027987.m1.gene
ko03420	Nucleotide excision repair	0.0076	0.0093	0.81	0.732653	0.980554	LITCHI008346.m1.gene;LITCHI022539.m1.gene;LITCHI026296.m2.gene;Litchi_chinensis_newGene_1308
ko00053	Ascorbate and aldarate metabolism	0.0076	0.0095	0.8	0.745695	0.980554	LITCHI003640.m1.gene;LITCHI007899.m1.gene;LITCHI007903.m1.gene;LITCHI014231.m1.gene
ko00220	Arginine biosynthesis	0.0038	0.005	0.76	0.749517	0.980554	LITCHI007076.m6.gene;LITCHI028276.m1.gene
ko00603	Glycosphingolipid biosynthesis - globo and isoglobo series	0.0019	0.0026	0.73	0.754189	0.980554	LITCHI018238.m1.gene
ko00966	Glucosinolate biosynthesis	0.0019	0.0028	0.68	0.77617	0.980554	LITCHI010771.m10.gene
ko00480	Glutathione metabolism	0.0113	0.0147	0.77	0.794085	0.980554	LITCHI010045.m1.gene;LITCHI015148.m1.gene;LITCHI018518.m1.gene;LITCHI020680.m1.gene;LITCHI023121.m1.gene;LITCHI027946.m1.gene
ko00904	Diterpenoid biosynthesis	0.0038	0.0057	0.66	0.810406	0.980554	LITCHI016694.m1.gene;LITCHI018926.m1.gene
ko00900	Terpenoid backbone biosynthesis	0.0057	0.0082	0.69	0.814913	0.980554	LITCHI002137.m1.gene;LITCHI008175.m1.gene;LITCHI025166.m1.gene
ko04144	Endocytosis	0.0246	0.0303	0.81	0.818344	0.980554	LITCHI003885.m1.gene;LITCHI004947.m1.gene;LITCHI010049.m1.gene;LITCHI010050.m1.gene;LITCHI011872.m1.gene;LITCHI018445.m1.gene;LITCHI018445.m3.gene;LITCHI018683.m10.gene;LITCHI020899.m1.gene;LITCHI021745.m1.gene;LITCHI022938.m1.gene;LITCHI027349.m1.gene;LITCHI027837.m2.gene
ko01210	2-Oxocarboxylic acid metabolism	0.0095	0.0131	0.72	0.829374	0.980554	LITCHI005872.m1.gene;LITCHI007076.m6.gene;LITCHI010771.m10.gene;LITCHI011549.m1.gene;LITCHI028276.m1.gene
ko04070	Phosphatidylinositol signaling system	0.0095	0.0135	0.7	0.849591	0.980554	LITCHI001405.m3.gene;LITCHI013258.m1.gene;LITCHI015367.m1.gene;LITCHI018683.m10.gene;LITCHI020450.m4.gene
ko04120	Ubiquitin mediated proteolysis	0.017	0.0229	0.74	0.86288	0.980554	LITCHI002966.m1.gene;LITCHI007572.m1.gene;LITCHI018979.m1.gene;LITCHI022337.m1.gene;LITCHI023012.m1.gene;LITCHI025618.m1.gene;LITCHI027682.m1.gene;LITCHI029291.m1.gene;Litchi_chinensis_newGene_508
ko00770	Pantothenate and CoA biosynthesis	0.0038	0.0066	0.58	0.867763	0.980554	LITCHI010771.m10.gene;LITCHI027987.m1.gene
ko03440	Homologous recombination	0.0076	0.0118	0.64	0.877324	0.980554	LITCHI002792.m1.gene;LITCHI018696.m1.gene;LITCHI018698.m1.gene;Litchi_chinensis_newGene_1308
ko00410	beta-Alanine metabolism	0.0038	0.007	0.54	0.890036	0.980554	LITCHI004176.m1.gene;LITCHI004876.m1.gene
ko00590	Arachidonic acid metabolism	0.0019	0.0042	0.45	0.899119	0.980554	LITCHI010092.m1.gene
ko00909	Sesquiterpenoid and triterpenoid biosynthesis	0.0076	0.0124	0.61	0.899892	0.980554	LITCHI022586.m1.gene;LITCHI029350.m1.gene;LITCHI031448.m1.gene;Litchi_chinensis_newGene_7852
ko00941	Flavonoid biosynthesis	0.0076	0.0126	0.6	0.90563	0.980554	LITCHI000598.m1.gene;LITCHI001586.m1.gene;LITCHI018208.m1.gene;LITCHI026910.m1.gene
ko03410	Base excision repair	0.0038	0.0075	0.5	0.912159	0.980554	LITCHI008346.m1.gene;LITCHI028502.m1.gene
ko03013	RNA transport	0.0227	0.0316	0.72	0.912907	0.980554	LITCHI004685.m1.gene;LITCHI008766.m1.gene;LITCHI009151.m1.gene;LITCHI017254.m1.gene;LITCHI018490.m1.gene;LITCHI021926.m1.gene;LITCHI021926.m4.gene;LITCHI022012.m1.gene;LITCHI023038.m1.gene;LITCHI023576.m6.gene;LITCHI029184.m1.gene;LITCHI030503.m1.gene
ko00380	Tryptophan metabolism	0.0057	0.0103	0.55	0.913461	0.980554	LITCHI009991.m6.gene;LITCHI017066.m1.gene;LITCHI026360.m1.gene
ko04136	Autophagy - other	0.0019	0.0048	0.39	0.927365	0.980554	LITCHI026663.m1.gene
ko00052	Galactose metabolism	0.0113	0.0187	0.61	0.935404	0.980554	LITCHI006542.m1.gene;LITCHI022176.m1.gene;LITCHI024725.m1.gene;LITCHI026165.m1.gene;LITCHI030108.m1.gene;LITCHI030113.m1.gene
ko00330	Arginine and proline metabolism	0.0038	0.0085	0.45	0.942286	0.980554	LITCHI010045.m1.gene;LITCHI014637.m1.gene
ko00945	Stilbenoid, diarylheptanoid and gingerol biosynthesis	0.0019	0.0056	0.34	0.952402	0.980554	LITCHI001586.m1.gene
ko00051	Fructose and mannose metabolism	0.0076	0.0147	0.52	0.954878	0.980554	LITCHI000135.m1.gene;LITCHI006594.m1.gene;LITCHI008994.m1.gene;LITCHI027718.m1.gene
ko03008	Ribosome biogenesis in eukaryotes	0.0095	0.0173	0.55	0.955535	0.980554	LITCHI000673.m1.gene;LITCHI004063.m1.gene;LITCHI009436.m1.gene;LITCHI016981.m1.gene;LITCHI018684.m6.gene
ko00130	Ubiquinone and other terpenoid-quinone biosynthesis	0.0038	0.0091	0.41	0.957723	0.980554	LITCHI022590.m1.gene;LITCHI031673.m2.gene
ko00906	Carotenoid biosynthesis	0.0038	0.0091	0.41	0.957723	0.980554	LITCHI003441.m1.gene;LITCHI012579.m1.gene
ko03018	RNA degradation	0.0113	0.0205	0.55	0.963868	0.980554	LITCHI003389.m1.gene;LITCHI008841.m3.gene;LITCHI012539.m2.gene;LITCHI020794.m1.gene;LITCHI024191.m1.gene;LITCHI024390.m5.gene
ko00640	Propanoate metabolism	0.0019	0.0063	0.3	0.967319	0.980554	LITCHI004176.m1.gene
ko00010	Glycolysis / Gluconeogenesis	0.0151	0.0267	0.57	0.974238	0.980554	LITCHI000135.m1.gene;LITCHI006363.m1.gene;LITCHI010022.m1.gene;LITCHI014398.m1.gene;LITCHI018342.m1.gene;LITCHI020277.m1.gene;LITCHI022176.m1.gene;LITCHI027718.m1.gene
ko00020	Citrate cycle (TCA cycle)	0.0038	0.0104	0.36	0.976675	0.980554	LITCHI015351.m1.gene;LITCHI020277.m1.gene
ko00310	Lysine degradation	0.0019	0.0072	0.26	0.979581	0.980554	LITCHI020836.m1.gene
ko00970	Aminoacyl-tRNA biosynthesis	0.0057	0.014	0.41	0.980654	0.980554	LITCHI001397.m1.gene;LITCHI011665.m1.gene;LITCHI016398.m1.gene
ko00040	Pentose and glucuronate interconversions	0.0132	0.0256	0.52	0.984262	0.980554	LITCHI003660.m1.gene;LITCHI008994.m1.gene;LITCHI009129.m1.gene;LITCHI017479.m1.gene;LITCHI018342.m1.gene;LITCHI026502.m1.gene;LITCHI027023.m1.gene
ko00030	Pentose phosphate pathway	0.0057	0.0146	0.39	0.985027	0.980554	LITCHI000135.m1.gene;LITCHI020680.m1.gene;LITCHI021718.m1.gene
ko04712	Circadian rhythm - plant	0.0038	0.0114	0.33	0.985038	0.980554	LITCHI006903.m1.gene;LITCHI016333.m1.gene
ko03010	Ribosome	0.0151	0.0328	0.46	0.996641	0.980554	LITCHI004885.m1.gene;LITCHI006317.m1.gene;LITCHI006487.m5.gene;LITCHI007059.m1.gene;LITCHI014720.m1.gene;LITCHI022495.m1.gene;LITCHI025973.m1.gene;Litchi_chinensis_newGene_508
ko00190	Oxidative phosphorylation	0.0038	0.0149	0.25	0.997267	0.980554	LITCHI001339.m1.gene;LITCHI011584.m1.gene
ko04145	Phagosome	0.0019	0.0115	0.16	0.998068	0.980554	LITCHI010746.m1.gene
ko03050	Proteasome	0.0019	0.0124	0.15	0.998852	0.980554	LITCHI019797.m2.gene
ko03015	mRNA surveillance pathway	0.0019	0.0151	0.13	0.999736	0.980554	LITCHI012384.m1.gene
ko04141	Protein processing in endoplasmic reticulum	0.0132	0.0389	0.34	0.999895	0.980554	LITCHI002939.m1.gene;LITCHI014480.m1.gene;LITCHI015879.m1.gene;LITCHI023843.m1.gene;LITCHI024741.m1.gene;LITCHI027837.m2.gene;LITCHI029574.m1.gene

## Sheet: DElncRNAs in fruits
KEGG pathway assignments for DElncRNAs in fruits
ID	Description	GeneRatio	BgRatio	enrich_factor	pvalue	qvalue	geneID
ko03450	Non-homologous end-joining	0.0224	0.0017	12.99	3.08645e-05	0.00311893	LITCHI025479.m1.gene;LITCHI025480.m1.gene;LITCHI025481.m1.gene;LITCHI025485.m1.gene;LITCHI025486.m1.gene
ko00630	Glyoxylate and dicarboxylate metabolism	0.0538	0.0174	3.09	0.000532816	0.0260894	LITCHI000477.m1.gene;LITCHI000479.m1.gene;LITCHI000481.m1.gene;LITCHI000483.m1.gene;LITCHI000495.m1.gene;LITCHI009348.m1.gene;LITCHI010378.m1.gene;LITCHI014074.m1.gene;LITCHI014117.m1.gene;LITCHI015791.m4.gene;LITCHI015829.m1.gene;LITCHI023088.m1.gene
ko04016	MAPK signaling pathway - plant	0.1031	0.05	2.06	0.000774529	0.0260894	LITCHI003914.m1.gene;LITCHI004270.m1.gene;LITCHI004773.m1.gene;LITCHI011035.m1.gene;LITCHI011036.m1.gene;LITCHI012609.m1.gene;LITCHI015371.m1.gene;LITCHI015709.m1.gene;LITCHI017482.m1.gene;LITCHI018348.m1.gene;LITCHI021833.m1.gene;LITCHI025345.m1.gene;LITCHI025345.m2.gene;LITCHI025346.m1.gene;LITCHI025346.m2.gene;LITCHI025346.m3.gene;LITCHI026054.m1.gene;LITCHI027597.m1.gene;LITCHI028353.m1.gene;…
ko00902	Monoterpenoid biosynthesis	0.0135	0.0025	5.38	0.0177628	0.402882	LITCHI007195.m2.gene;LITCHI007195.m3.gene;LITCHI021197.m3.gene
ko00460	Cyanoamino acid metabolism	0.0314	0.0125	2.51	0.0219679	0.402882	LITCHI002623.m1.gene;LITCHI010378.m1.gene;LITCHI017700.m1.gene;LITCHI029547.m1.gene;LITCHI031064.m1.gene;LITCHI031071.m1.gene;LITCHI031076.m1.gene
ko00940	Phenylpropanoid biosynthesis	0.0628	0.0348	1.81	0.0239211	0.402882	LITCHI002623.m1.gene;LITCHI005410.m1.gene;LITCHI011382.m1.gene;LITCHI014607.m1.gene;LITCHI016367.m2.gene;LITCHI016426.m1.gene;LITCHI016493.m1.gene;LITCHI018720.m1.gene;LITCHI024178.m1.gene;LITCHI024182.m3.gene;LITCHI024649.m1.gene;LITCHI028596.m1.gene;LITCHI029547.m1.gene;LITCHI031122.m1.gene
ko00430	Taurine and hypotaurine metabolism	0.009	0.0012	7.43	0.0287999	0.415758	LITCHI005983.m1.gene;LITCHI017700.m1.gene
ko00510	N-Glycan biosynthesis	0.0224	0.0081	2.76	0.0348339	0.427371	LITCHI005769.m3.gene;LITCHI020610.m6.gene;LITCHI025340.m1.gene;LITCHI025340.m2.gene;LITCHI031454.m1.gene
ko00513	Various types of N-glycan biosynthesis	0.0179	0.0057	3.15	0.0380627	0.427371	LITCHI002472.m1.gene;LITCHI025340.m1.gene;LITCHI025340.m2.gene;LITCHI031454.m1.gene
ko00908	Zeatin biosynthesis	0.0224	0.0087	2.57	0.045215	0.45691	LITCHI009263.m1.gene;LITCHI018299.m1.gene;LITCHI018713.m1.gene;LITCHI019395.m1.gene;LITCHI027611.m1.gene
ko00250	Alanine, aspartate and glutamate metabolism	0.0179	0.0068	2.63	0.0656685	0.60327	LITCHI005983.m1.gene;LITCHI007835.m1.gene;LITCHI018893.m1.gene;LITCHI029890.m1.gene
ko00240	Pyrimidine metabolism	0.0224	0.0106	2.11	0.0886765	0.648076	LITCHI015994.m17.gene;LITCHI018893.m1.gene;LITCHI025346.m1.gene;LITCHI025346.m2.gene;LITCHI025346.m3.gene
ko00760	Nicotinate and nicotinamide metabolism	0.0135	0.0047	2.84	0.0890672	0.648076	LITCHI004834.m6.gene;LITCHI011289.m1.gene;LITCHI015994.m17.gene
ko00564	Glycerophospholipid metabolism	0.0314	0.0172	1.83	0.0897856	0.648076	LITCHI014017.m1.gene;LITCHI014936.m1.gene;LITCHI025358.m1.gene;LITCHI025476.m1.gene;LITCHI025492.m1.gene;LITCHI025492.m12.gene;LITCHI027547.m2.gene
ko00603	Glycosphingolipid biosynthesis - globo and isoglobo series	0.009	0.0026	3.47	0.112902	0.748981	LITCHI002472.m1.gene;LITCHI021819.m1.gene
ko00966	Glucosinolate biosynthesis	0.009	0.0028	3.25	0.12563	0.748981	LITCHI031064.m1.gene;LITCHI031076.m1.gene
ko00360	Phenylalanine metabolism	0.0179	0.0089	2.02	0.136963	0.748981	LITCHI001990.m1.gene;LITCHI007907.m1.gene;LITCHI024649.m1.gene;LITCHI030446.m1.gene
ko00944	Flavone and flavonol biosynthesis	0.009	0.003	2.97	0.14531	0.748981	LITCHI002307.m1.gene;LITCHI011335.m1.gene
ko00941	Flavonoid biosynthesis	0.0224	0.0126	1.78	0.150687	0.748981	LITCHI001703.m1.gene;LITCHI002307.m1.gene;LITCHI007830.m1.gene;LITCHI016493.m1.gene;LITCHI018208.m1.gene
ko00230	Purine metabolism	0.0269	0.0165	1.63	0.162881	0.748981	LITCHI010839.m10.gene;LITCHI012284.m1.gene;LITCHI015994.m17.gene;LITCHI025346.m1.gene;LITCHI025346.m2.gene;LITCHI025346.m3.gene
ko01210	2-Oxocarboxylic acid metabolism	0.0224	0.0131	1.71	0.169274	0.748981	LITCHI014074.m1.gene;LITCHI014117.m1.gene;LITCHI029890.m1.gene;LITCHI031064.m1.gene;LITCHI031076.m1.gene
ko00860	Porphyrin and chlorophyll metabolism	0.0179	0.0098	1.82	0.176964	0.748981	LITCHI012880.m1.gene;LITCHI012951.m1.gene;LITCHI012952.m1.gene;LITCHI024284.m1.gene
ko00910	Nitrogen metabolism	0.0135	0.0066	2.05	0.17995	0.748981	LITCHI020566.m1.gene;LITCHI024621.m1.gene;LITCHI024645.m1.gene
ko04070	Phosphatidylinositol signaling system	0.0224	0.0135	1.66	0.185414	0.748981	LITCHI011035.m1.gene;LITCHI011036.m1.gene;LITCHI025476.m1.gene;LITCHI025492.m1.gene;LITCHI025492.m12.gene
ko00730	Thiamine metabolism	0.009	0.0036	2.48	0.193272	0.748981	LITCHI017198.m1.gene;LITCHI018233.m1.gene
ko02010	ABC transporters	0.0224	0.0138	1.62	0.195359	0.748981	LITCHI005455.m1.gene;LITCHI014544.m1.gene;LITCHI025341.m1.gene;LITCHI030046.m1.gene;Litchi_chinensis_newGene_2277
ko00072	Synthesis and degradation of ketone bodies	0.0045	0.001	4.33	0.208029	0.748981	LITCHI008612.m1.gene
ko00340	Histidine metabolism	0.009	0.0039	2.31	0.214414	0.748981	LITCHI020508.m1.gene;LITCHI025875.m1.gene
ko00903	Limonene and pinene degradation	0.0045	0.0011	4	0.223281	0.748981	LITCHI020508.m1.gene
ko00592	alpha-Linolenic acid metabolism	0.0135	0.0073	1.83	0.224498	0.748981	LITCHI011714.m1.gene;LITCHI014936.m1.gene;LITCHI025358.m1.gene
ko00480	Glutathione metabolism	0.0224	0.0147	1.53	0.229766	0.748981	LITCHI015156.m1.gene;LITCHI015314.m1.gene;LITCHI017700.m1.gene;LITCHI024988.m1.gene;LITCHI025338.m1.gene
ko00943	Isoflavonoid biosynthesis	0.009	0.0042	2.12	0.2429	0.767054	LITCHI007830.m1.gene;LITCHI010868.m1.gene
ko00710	Carbon fixation in photosynthetic organisms	0.0135	0.0079	1.69	0.26048	0.785754	LITCHI024879.m1.gene;LITCHI024881.m1.gene;LITCHI029890.m1.gene
ko00650	Butanoate metabolism	0.009	0.0045	2	0.264373	0.785754	LITCHI005983.m1.gene;LITCHI008612.m1.gene
ko00280	Valine, leucine and isoleucine degradation	0.0135	0.0091	1.47	0.33409	0.913647	LITCHI007835.m1.gene;LITCHI008612.m1.gene;LITCHI020508.m1.gene
ko00960	Tropane, piperidine and pyridine alkaloid biosynthesis	0.009	0.0054	1.65	0.342656	0.913647	LITCHI007907.m1.gene;LITCHI027661.m1.gene
ko03008	Ribosome biogenesis in eukaryotes	0.0224	0.0173	1.29	0.344682	0.913647	LITCHI010124.m1.gene;LITCHI025472.m1.gene;LITCHI025473.m1.gene;LITCHI025489.m1.gene;LITCHI030183.m1.gene
ko00040	Pentose and glucuronate interconversions	0.0314	0.0256	1.23	0.346765	0.913647	LITCHI004398.m1.gene;LITCHI008904.m1.gene;LITCHI009646.m1.gene;LITCHI023003.m1.gene;LITCHI025886.m1.gene;LITCHI025891.m1.gene;LITCHI029597.m1.gene
ko00904	Diterpenoid biosynthesis	0.009	0.0057	1.58	0.363621	0.913647	LITCHI013387.m1.gene;LITCHI029255.m1.gene
ko00920	Sulfur metabolism	0.009	0.0059	1.53	0.377458	0.913647	LITCHI014966.m1.gene;LITCHI021309.m1.gene
ko00380	Tryptophan metabolism	0.0135	0.0103	1.31	0.402277	0.913647	LITCHI001990.m1.gene;LITCHI020508.m1.gene;LITCHI030446.m1.gene
ko04075	Plant hormone signal transduction	0.0673	0.0621	1.08	0.41312	0.913647	LITCHI004576.m1.gene;LITCHI008378.m1.gene;LITCHI010388.m1.gene;LITCHI012407.m1.gene;LITCHI012849.m1.gene;LITCHI015371.m1.gene;LITCHI017499.m1.gene;LITCHI018348.m1.gene;LITCHI019771.m6.gene;LITCHI020914.m1.gene;LITCHI021833.m1.gene;LITCHI025478.m1.gene;LITCHI026054.m1.gene;LITCHI027551.m1.gene;LITCHI028545.m1.gene
ko00950	Isoquinoline alkaloid biosynthesis	0.009	0.0064	1.4	0.418176	0.913647	LITCHI007907.m1.gene;LITCHI030446.m1.gene
ko00402	Benzoxazinoid biosynthesis	0.0045	0.0024	1.86	0.419917	0.913647	LITCHI025000.m1.gene
ko00190	Oxidative phosphorylation	0.0179	0.0149	1.2	0.427133	0.913647	LITCHI012951.m1.gene;LITCHI012952.m1.gene;LITCHI026848.m1.gene;LITCHI026853.m1.gene
ko00100	Steroid biosynthesis	0.009	0.0066	1.35	0.43803	0.913647	LITCHI012859.m1.gene;LITCHI025483.m1.gene
ko01040	Biosynthesis of unsaturated fatty acids	0.0045	0.0028	1.62	0.463394	0.913647	LITCHI019131.m1.gene
ko00410	beta-Alanine metabolism	0.009	0.007	1.28	0.46392	0.913647	LITCHI005983.m1.gene;LITCHI020508.m1.gene
ko03410	Base excision repair	0.009	0.0075	1.19	0.501411	0.913647	LITCHI023597.m1.gene;LITCHI024463.m1.gene
ko04141	Protein processing in endoplasmic reticulum	0.0404	0.0389	1.04	0.503753	0.913647	LITCHI004068.m1.gene;LITCHI005750.m1.gene;LITCHI005778.m1.gene;LITCHI008647.m1.gene;LITCHI010559.m1.gene;LITCHI023599.m1.gene;LITCHI024902.m1.gene;LITCHI030033.m1.gene;LITCHI031454.m1.gene
ko00905	Brassinosteroid biosynthesis	0.0045	0.0032	1.4	0.513205	0.913647	LITCHI005357.m1.gene
ko00561	Glycerolipid metabolism	0.0179	0.0168	1.07	0.519373	0.913647	LITCHI013943.m1.gene;LITCHI014017.m1.gene;LITCHI020508.m1.gene;LITCHI021819.m1.gene
ko00909	Sesquiterpenoid and triterpenoid biosynthesis	0.0135	0.0124	1.08	0.526407	0.913647	LITCHI012859.m1.gene;LITCHI031166.m1.gene;LITCHI031662.m1.gene
ko03022	Basal transcription factors	0.009	0.0079	1.13	0.531343	0.913647	LITCHI019393.m1.gene;LITCHI030149.m1.gene
ko04626	Plant-pathogen interaction	0.1076	0.1084	0.99	0.546749	0.913647	LITCHI001820.m1.gene;LITCHI003103.m1.gene;LITCHI004270.m1.gene;LITCHI004773.m1.gene;LITCHI011035.m1.gene;LITCHI011036.m1.gene;LITCHI012609.m1.gene;LITCHI014366.m1.gene;LITCHI015709.m1.gene;LITCHI017482.m1.gene;LITCHI020266.m5.gene;LITCHI021964.m1.gene;LITCHI022670.m1.gene;LITCHI024655.m1.gene;LITCHI025345.m1.gene;LITCHI025345.m2.gene;LITCHI025821.m1.gene;LITCHI028353.m1.gene;LITCHI028545.m1.gene;…
ko00670	One carbon pool by folate	0.0045	0.0036	1.24	0.558411	0.913647	LITCHI010378.m1.gene
ko01230	Biosynthesis of amino acids	0.0404	0.0407	0.99	0.559239	0.913647	LITCHI007907.m1.gene;LITCHI010378.m1.gene;LITCHI012284.m1.gene;LITCHI014074.m1.gene;LITCHI014117.m1.gene;LITCHI024879.m1.gene;LITCHI024881.m1.gene;LITCHI025875.m1.gene;LITCHI029890.m1.gene
ko00330	Arginine and proline metabolism	0.009	0.0085	1.06	0.56562	0.913647	LITCHI001990.m1.gene;LITCHI020508.m1.gene
ko00965	Betalain biosynthesis	0.0045	0.0038	1.18	0.5753	0.913647	LITCHI030446.m1.gene
ko00970	Aminoacyl-tRNA biosynthesis	0.0135	0.014	0.96	0.60646	0.913647	LITCHI011845.m1.gene;LITCHI025356.m1.gene;LITCHI031516.m1.gene
ko00130	Ubiquinone and other terpenoid-quinone biosynthesis	0.009	0.0091	0.98	0.608472	0.913647	LITCHI016367.m2.gene;LITCHI016493.m1.gene
ko00906	Carotenoid biosynthesis	0.009	0.0091	0.98	0.608472	0.913647	LITCHI001626.m1.gene;LITCHI018927.m1.gene
ko00350	Tyrosine metabolism	0.009	0.0092	0.97	0.613597	0.913647	LITCHI007907.m1.gene;LITCHI030446.m1.gene
ko00590	Arachidonic acid metabolism	0.0045	0.0042	1.06	0.614763	0.913647	LITCHI017700.m1.gene
ko00604	Glycosphingolipid biosynthesis - ganglio series	0.0045	0.0042	1.06	0.614763	0.913647	LITCHI002472.m1.gene
ko00790	Folate biosynthesis	0.0045	0.0042	1.06	0.614763	0.913647	LITCHI022942.m1.gene
ko00563	Glycosylphosphatidylinositol (GPI)-anchor biosynthesis	0.0045	0.0043	1.04	0.622206	0.913647	LITCHI020027.m1.gene
ko00053	Ascorbate and aldarate metabolism	0.009	0.0095	0.95	0.628668	0.913647	LITCHI010113.m1.gene;LITCHI020508.m1.gene
ko00062	Fatty acid elongation	0.0045	0.0045	1	0.636665	0.913647	LITCHI001820.m1.gene
ko00450	Selenocompound metabolism	0.0045	0.0049	0.91	0.670449	0.913647	LITCHI003490.m1.gene
ko01200	Carbon metabolism	0.0404	0.0447	0.9	0.670588	0.913647	LITCHI010378.m1.gene;LITCHI012284.m1.gene;LITCHI014074.m1.gene;LITCHI014117.m1.gene;LITCHI015791.m4.gene;LITCHI015829.m1.gene;LITCHI024879.m1.gene;LITCHI024881.m1.gene;LITCHI029890.m1.gene
ko00220	Arginine biosynthesis	0.0045	0.005	0.9	0.67682	0.913647	LITCHI029890.m1.gene
ko00020	Citrate cycle (TCA cycle)	0.009	0.0104	0.86	0.68003	0.913647	LITCHI014074.m1.gene;LITCHI014117.m1.gene
ko03020	RNA polymerase	0.0045	0.0051	0.88	0.683069	0.913647	LITCHI028286.m1.gene
ko00260	Glycine, serine and threonine metabolism	0.009	0.011	0.82	0.705529	0.913647	LITCHI007835.m1.gene;LITCHI010378.m1.gene
ko00945	Stilbenoid, diarylheptanoid and gingerol biosynthesis	0.0045	0.0056	0.8	0.718116	0.913647	LITCHI016493.m1.gene
ko00270	Cysteine and methionine metabolism	0.0135	0.0168	0.8	0.72845	0.913647	LITCHI005523.m1.gene;LITCHI007835.m1.gene;LITCHI014858.m1.gene
ko03430	Mismatch repair	0.0045	0.006	0.75	0.739309	0.913647	LITCHI023597.m1.gene
ko00531	Glycosaminoglycan degradation	0.0045	0.0061	0.73	0.749302	0.913647	LITCHI002472.m1.gene
ko00770	Pantothenate and CoA biosynthesis	0.0045	0.0066	0.68	0.772649	0.913647	LITCHI020508.m1.gene
ko00620	Pyruvate metabolism	0.009	0.0132	0.68	0.797168	0.913647	LITCHI012284.m1.gene;LITCHI020508.m1.gene
ko00310	Lysine degradation	0.0045	0.0072	0.63	0.801743	0.913647	LITCHI020508.m1.gene
ko04144	Endocytosis	0.0224	0.0303	0.74	0.810201	0.913647	LITCHI002991.m1.gene;LITCHI004068.m1.gene;LITCHI024896.m1.gene;LITCHI030644.m3.gene;Litchi_chinensis_newGene_6499
ko00400	Phenylalanine, tyrosine and tryptophan biosynthesis	0.0045	0.0074	0.6	0.813047	0.913647	LITCHI007907.m1.gene
ko03030	DNA replication	0.0045	0.0075	0.6	0.816671	0.913647	LITCHI023597.m1.gene
ko00500	Starch and sucrose metabolism	0.0314	0.0415	0.76	0.82373	0.913647	LITCHI002623.m1.gene;LITCHI006163.m1.gene;LITCHI011001.m1.gene;LITCHI023128.m3.gene;LITCHI024883.m1.gene;LITCHI026892.m5.gene;LITCHI029547.m1.gene
ko00073	Cutin, suberine and wax biosynthesis	0.0045	0.0079	0.56	0.833767	0.913647	LITCHI007744.m1.gene
ko03018	RNA degradation	0.0135	0.0205	0.66	0.840639	0.913647	LITCHI005404.m1.gene;LITCHI012741.m1.gene;LITCHI029836.m1.gene
ko00051	Fructose and mannose metabolism	0.009	0.0147	0.61	0.842582	0.913647	LITCHI024879.m1.gene;LITCHI024881.m1.gene
ko00010	Glycolysis / Gluconeogenesis	0.0179	0.0267	0.67	0.85003	0.913647	LITCHI012284.m1.gene;LITCHI020508.m1.gene;LITCHI024879.m1.gene;LITCHI024881.m1.gene
ko03015	mRNA surveillance pathway	0.009	0.0151	0.59	0.854075	0.913647	LITCHI013143.m1.gene;LITCHI025349.m1.gene
ko00562	Inositol phosphate metabolism	0.009	0.0153	0.59	0.858455	0.913647	LITCHI024879.m1.gene;LITCHI024881.m1.gene
ko00071	Fatty acid degradation	0.0045	0.0087	0.51	0.860638	0.913647	LITCHI020508.m1.gene
ko03040	Spliceosome	0.0224	0.0336	0.67	0.873546	0.913647	LITCHI004068.m1.gene;LITCHI013406.m1.gene;LITCHI013778.m1.gene;LITCHI021698.m1.gene;LITCHI025349.m1.gene
ko03420	Nucleotide excision repair	0.0045	0.0093	0.48	0.878508	0.913647	LITCHI023597.m1.gene
ko04146	Peroxisome	0.009	0.0167	0.54	0.889401	0.913647	LITCHI008612.m1.gene;LITCHI015829.m1.gene
ko04120	Ubiquitin mediated proteolysis	0.0135	0.0229	0.59	0.890064	0.913647	LITCHI001591.m1.gene;LITCHI014564.m1.gene;LITCHI030033.m1.gene
ko00511	Other glycan degradation	0.0045	0.0104	0.43	0.905861	0.913647	LITCHI002472.m1.gene
ko00600	Sphingolipid metabolism	0.0045	0.0104	0.43	0.905861	0.913647	LITCHI021819.m1.gene
ko03013	RNA transport	0.0179	0.0316	0.57	0.925574	0.913647	LITCHI010124.m1.gene;LITCHI012231.m1.gene;LITCHI015815.m1.gene;LITCHI025349.m1.gene
ko04145	Phagosome	0.0045	0.0115	0.39	0.92563	0.913647	LITCHI022113.m1.gene
ko01212	Fatty acid metabolism	0.0045	0.0116	0.39	0.928497	0.913647	LITCHI019131.m1.gene
ko03440	Homologous recombination	0.0045	0.0118	0.38	0.931253	0.913647	LITCHI016336.m1.gene
ko00520	Amino sugar and nucleotide sugar metabolism	0.0135	0.0284	0.47	0.954862	0.927801	LITCHI002472.m1.gene;LITCHI016176.m1.gene;LITCHI019379.m1.gene
ko00052	Galactose metabolism	0.0045	0.0187	0.24	0.985817	0.948756	LITCHI021819.m1.gene
ko03010	Ribosome	0.009	0.0328	0.27	0.995214	0.948764	LITCHI019731.m1.gene;LITCHI031482.m1.gene

## Sheet: DElncRNAs in leaves
KEGG pathway assignments for DElncRNAs in leaves
ID	Description	GeneRatio	BgRatio	enrich_factor	pvalue	qvalue	geneID
ko03010	Ribosome	0.0571	0.0328	1.74	9.62319e-14	1.14465e-11	LITCHI000684.m1.gene;LITCHI001215.m1.gene;LITCHI001450.m1.gene;LITCHI001585.m1.gene;LITCHI001843.m1.gene;LITCHI002344.m1.gene;LITCHI002985.m1.gene;LITCHI003688.m1.gene;LITCHI004231.m1.gene;LITCHI004267.m1.gene;LITCHI004388.m1.gene;LITCHI004680.m1.gene;LITCHI004885.m1.gene;LITCHI005821.m1.gene;LITCHI006156.m1.gene;LITCHI006487.m5.gene;LITCHI006630.m1.gene;LITCHI006797.m1.gene;LITCHI007059.m1.gene;…
ko00190	Oxidative phosphorylation	0.0228	0.0149	1.53	0.000247908	0.014744	LITCHI001813.m1.gene;LITCHI001931.m1.gene;LITCHI001936.m1.gene;LITCHI002104.m1.gene;LITCHI002384.m1.gene;LITCHI002903.m1.gene;LITCHI002916.m1.gene;LITCHI003779.m1.gene;LITCHI004126.m1.gene;LITCHI004384.m1.gene;LITCHI004712.m3.gene;LITCHI005708.m1.gene;LITCHI006250.m1.gene;LITCHI006499.m1.gene;LITCHI006601.m1.gene;LITCHI006643.m1.gene;LITCHI007075.m1.gene;LITCHI007130.m1.gene;LITCHI008087.m1.gene;…
ko00770	Pantothenate and CoA biosynthesis	0.0116	0.0066	1.77	0.00056646	0.0184634	LITCHI001268.m1.gene;LITCHI001377.m4.gene;LITCHI002471.m1.gene;LITCHI002471.m2.gene;LITCHI002471.m4.gene;LITCHI004973.m1.gene;LITCHI004975.m2.gene;LITCHI007122.m1.gene;LITCHI007382.m1.gene;LITCHI008116.m1.gene;LITCHI008696.m1.gene;LITCHI010381.m1.gene;LITCHI010383.m1.gene;LITCHI010384.m1.gene;LITCHI010769.m1.gene;LITCHI010771.m10.gene;LITCHI010771.m12.gene;LITCHI011264.m1.gene;LITCHI014486.m1.gen…
ko01200	Carbon metabolism	0.0567	0.0447	1.27	0.000620893	0.0184634	LITCHI000289.m1.gene;LITCHI000391.m1.gene;LITCHI001273.m1.gene;LITCHI001289.m1.gene;LITCHI001964.m1.gene;LITCHI002037.m1.gene;LITCHI002158.m1.gene;LITCHI003008.m1.gene;LITCHI003011.m1.gene;LITCHI003012.m1.gene;LITCHI003187.m1.gene;LITCHI003343.m6.gene;LITCHI003536.m1.gene;LITCHI003695.m1.gene;LITCHI003714.m1.gene;LITCHI003716.m1.gene;LITCHI003717.m1.gene;LITCHI003717.m3.gene;LITCHI003717.m4.gene;…
ko00620	Pyruvate metabolism	0.0197	0.0132	1.49	0.00113334	0.0269616	LITCHI004526.m1.gene;LITCHI004594.m1.gene;LITCHI004973.m1.gene;LITCHI004975.m2.gene;LITCHI005047.m1.gene;LITCHI005456.m1.gene;LITCHI006026.m1.gene;LITCHI006031.m1.gene;LITCHI006359.m1.gene;LITCHI007159.m1.gene;LITCHI007382.m1.gene;LITCHI008109.m1.gene;LITCHI008112.m1.gene;LITCHI010435.m1.gene;LITCHI011264.m1.gene;LITCHI011617.m1.gene;LITCHI012899.m1.gene;LITCHI012990.m1.gene;LITCHI014314.m1.gene;…
ko00330	Arginine and proline metabolism	0.0135	0.0085	1.6	0.00174043	0.0345033	LITCHI001200.m1.gene;LITCHI001355.m1.gene;LITCHI001935.m1.gene;LITCHI001979.m1.gene;LITCHI003947.m1.gene;LITCHI003952.m1.gene;LITCHI004421.m1.gene;LITCHI004973.m1.gene;LITCHI004975.m2.gene;LITCHI007382.m1.gene;LITCHI008116.m1.gene;LITCHI010060.m1.gene;LITCHI011264.m1.gene;LITCHI014486.m1.gene;LITCHI014620.m1.gene;LITCHI016328.m1.gene;LITCHI016773.m1.gene;LITCHI016926.m1.gene;LITCHI017131.m1.gene;…
ko00710	Carbon fixation in photosynthetic organisms	0.0127	0.0079	1.6	0.00213973	0.0363594	LITCHI001273.m1.gene;LITCHI001964.m1.gene;LITCHI004871.m4.gene;LITCHI005456.m1.gene;LITCHI005683.m1.gene;LITCHI005724.m1.gene;LITCHI007159.m1.gene;LITCHI009142.m1.gene;LITCHI009678.m1.gene;LITCHI009727.m1.gene;LITCHI009737.m1.gene;LITCHI011461.m1.gene;LITCHI011462.m1.gene;LITCHI012899.m1.gene;LITCHI012990.m1.gene;LITCHI015317.m1.gene;LITCHI016391.m1.gene;LITCHI016773.m1.gene;LITCHI017131.m1.gene;…
ko01230	Biosynthesis of amino acids	0.0505	0.0407	1.24	0.00293111	0.043581	LITCHI000122.m1.gene;LITCHI000391.m1.gene;LITCHI001377.m4.gene;LITCHI001691.m1.gene;LITCHI001849.m1.gene;LITCHI001964.m1.gene;LITCHI002158.m1.gene;LITCHI002204.m1.gene;LITCHI003295.m1.gene;LITCHI003536.m1.gene;LITCHI003695.m1.gene;LITCHI003714.m1.gene;LITCHI003716.m1.gene;LITCHI003717.m1.gene;LITCHI003717.m3.gene;LITCHI003717.m4.gene;LITCHI003717.m7.gene;LITCHI003718.m1.gene;LITCHI003719.m1.gene;…
ko00410	beta-Alanine metabolism	0.0112	0.007	1.6	0.00397724	0.0525646	LITCHI001268.m1.gene;LITCHI001289.m1.gene;LITCHI004421.m1.gene;LITCHI004874.m1.gene;LITCHI004875.m1.gene;LITCHI004973.m1.gene;LITCHI004975.m2.gene;LITCHI007382.m1.gene;LITCHI008116.m1.gene;LITCHI011264.m1.gene;LITCHI014486.m1.gene;LITCHI014772.m1.gene;LITCHI016710.m1.gene;LITCHI017627.m1.gene;LITCHI018188.m1.gene;LITCHI019860.m1.gene;LITCHI020148.m1.gene;LITCHI020148.m5.gene;LITCHI020181.m1.gene;…
ko01040	Biosynthesis of unsaturated fatty acids	0.0054	0.0028	1.96	0.00570124	0.0678147	LITCHI000869.m1.gene;LITCHI004162.m1.gene;LITCHI004781.m1.gene;LITCHI004783.m1.gene;LITCHI007229.m1.gene;LITCHI015460.m1.gene;LITCHI018188.m1.gene;LITCHI018423.m1.gene;LITCHI020974.m1.gene;LITCHI024832.m1.gene;LITCHI024832.m2.gene;LITCHI025678.m1.gene;LITCHI025884.m1.gene;LITCHI026651.m1.gene
ko00280	Valine, leucine and isoleucine degradation	0.0135	0.0091	1.48	0.00741754	0.0802088	LITCHI001289.m1.gene;LITCHI001377.m4.gene;LITCHI001599.m1.gene;LITCHI004973.m1.gene;LITCHI004975.m2.gene;LITCHI007122.m1.gene;LITCHI007382.m1.gene;LITCHI010769.m1.gene;LITCHI010771.m10.gene;LITCHI010771.m12.gene;LITCHI011264.m1.gene;LITCHI011361.m1.gene;LITCHI014314.m1.gene;LITCHI014393.m1.gene;LITCHI014463.m1.gene;LITCHI014486.m1.gene;LITCHI014859.m1.gene;LITCHI016710.m1.gene;LITCHI017731.m1.gen…
ko01212	Fatty acid metabolism	0.0162	0.0116	1.39	0.0113099	0.112107	LITCHI000869.m1.gene;LITCHI001178.m1.gene;LITCHI001741.m1.gene;LITCHI001741.m2.gene;LITCHI003412.m4.gene;LITCHI004015.m1.gene;LITCHI004162.m1.gene;LITCHI004740.m1.gene;LITCHI004781.m1.gene;LITCHI004783.m1.gene;LITCHI005008.m1.gene;LITCHI005686.m1.gene;LITCHI007084.m1.gene;LITCHI007229.m1.gene;LITCHI007925.m1.gene;LITCHI008624.m1.gene;LITCHI010435.m1.gene;LITCHI011239.m4.gene;LITCHI014759.m1.gene;…
ko00600	Sphingolipid metabolism	0.0147	0.0104	1.4	0.0131837	0.120628	LITCHI000775.m1.gene;LITCHI000777.m1.gene;LITCHI000781.m1.gene;LITCHI000790.m1.gene;LITCHI000791.m1.gene;LITCHI000792.m1.gene;LITCHI000795.m1.gene;LITCHI000802.m1.gene;LITCHI000803.m1.gene;LITCHI001613.m1.gene;LITCHI004156.m1.gene;LITCHI004627.m1.gene;LITCHI004831.m1.gene;LITCHI006025.m1.gene;LITCHI006241.m1.gene;LITCHI006542.m1.gene;LITCHI006815.m3.gene;LITCHI008214.m1.gene;LITCHI008224.m1.gene;…
ko00270	Cysteine and methionine metabolism	0.0216	0.0168	1.28	0.021795	0.183851	LITCHI001377.m4.gene;LITCHI003295.m1.gene;LITCHI003695.m1.gene;LITCHI003714.m1.gene;LITCHI003716.m1.gene;LITCHI003717.m1.gene;LITCHI003717.m3.gene;LITCHI003717.m4.gene;LITCHI003717.m7.gene;LITCHI003718.m1.gene;LITCHI003719.m1.gene;LITCHI005872.m3.gene;LITCHI006356.m1.gene;LITCHI007120.m1.gene;LITCHI007122.m1.gene;LITCHI009709.m1.gene;LITCHI010769.m1.gene;LITCHI010771.m10.gene;LITCHI010771.m12.gen…
ko04145	Phagosome	0.0154	0.0115	1.34	0.0231848	0.183851	LITCHI001409.m1.gene;LITCHI001936.m1.gene;LITCHI002104.m1.gene;LITCHI002633.m1.gene;LITCHI002903.m1.gene;LITCHI004134.m1.gene;LITCHI004928.m1.gene;LITCHI006499.m1.gene;LITCHI007627.m3.gene;LITCHI008599.m4.gene;LITCHI009336.m1.gene;LITCHI009347.m1.gene;LITCHI009612.m1.gene;LITCHI010063.m1.gene;LITCHI010095.m1.gene;LITCHI010184.m1.gene;LITCHI010206.m1.gene;LITCHI010746.m1.gene;LITCHI011542.m1.gene;…
ko00010	Glycolysis / Gluconeogenesis	0.0324	0.0267	1.22	0.0249519	0.185498	LITCHI000135.m1.gene;LITCHI000461.m1.gene;LITCHI000575.m10.gene;LITCHI000575.m4.gene;LITCHI001273.m1.gene;LITCHI001964.m1.gene;LITCHI003008.m1.gene;LITCHI003011.m1.gene;LITCHI003012.m1.gene;LITCHI004594.m1.gene;LITCHI004973.m1.gene;LITCHI004975.m2.gene;LITCHI005047.m1.gene;LITCHI005683.m1.gene;LITCHI005827.m1.gene;LITCHI006026.m1.gene;LITCHI006031.m1.gene;LITCHI006359.m1.gene;LITCHI006811.m1.gene…
ko00230	Purine metabolism	0.0208	0.0165	1.26	0.0318642	0.222951	LITCHI000637.m1.gene;LITCHI002402.m1.gene;LITCHI002935.m1.gene;LITCHI003607.m1.gene;LITCHI004714.m1.gene;LITCHI004722.m1.gene;LITCHI005093.m1.gene;LITCHI005827.m1.gene;LITCHI006026.m1.gene;LITCHI006031.m1.gene;LITCHI006483.m1.gene;LITCHI007060.m1.gene;LITCHI007063.m20.gene;LITCHI007484.m1.gene;LITCHI008077.m1.gene;LITCHI008696.m1.gene;LITCHI008911.m1.gene;LITCHI009740.m3.gene;LITCHI010293.m1.gene…
ko00061	Fatty acid biosynthesis	0.0116	0.0085	1.37	0.0357361	0.236151	LITCHI001178.m1.gene;LITCHI001741.m1.gene;LITCHI001741.m2.gene;LITCHI003412.m4.gene;LITCHI004015.m1.gene;LITCHI004162.m1.gene;LITCHI004740.m1.gene;LITCHI005008.m1.gene;LITCHI005686.m1.gene;LITCHI007084.m1.gene;LITCHI007925.m1.gene;LITCHI008624.m1.gene;LITCHI010435.m1.gene;LITCHI011239.m4.gene;LITCHI014759.m1.gene;LITCHI014958.m1.gene;LITCHI015460.m1.gene;LITCHI016488.m1.gene;LITCHI017490.m1.gene;…
ko00903	Limonene and pinene degradation	0.0023	0.0011	2.06	0.0495748	0.297319	LITCHI004973.m1.gene;LITCHI004975.m2.gene;LITCHI007382.m1.gene;LITCHI011264.m1.gene;LITCHI014486.m1.gene;LITCHI022360.m1.gene
ko00232	Caffeine metabolism	0.0008	0.0002	4.47	0.0499917	0.297319	LITCHI023965.m1.gene;LITCHI027069.m1.gene
ko00020	Citrate cycle (TCA cycle)	0.0135	0.0104	1.29	0.0543504	0.305081	LITCHI002158.m1.gene;LITCHI004325.m1.gene;LITCHI004594.m1.gene;LITCHI005047.m1.gene;LITCHI006357.m1.gene;LITCHI006396.m1.gene;LITCHI006643.m1.gene;LITCHI007159.m1.gene;LITCHI008074.m1.gene;LITCHI009816.m1.gene;LITCHI011617.m1.gene;LITCHI012990.m1.gene;LITCHI013926.m1.gene;LITCHI014085.m1.gene;LITCHI014103.m1.gene;LITCHI014131.m1.gene;LITCHI014314.m1.gene;LITCHI014393.m1.gene;LITCHI014973.m1.gene;…
ko00062	Fatty acid elongation	0.0066	0.0045	1.46	0.0564264	0.305081	LITCHI000869.m1.gene;LITCHI004781.m1.gene;LITCHI004783.m1.gene;LITCHI007229.m1.gene;LITCHI014914.m1.gene;LITCHI014915.m1.gene;LITCHI014916.m1.gene;LITCHI014917.m1.gene;LITCHI016531.m1.gene;LITCHI018423.m1.gene;LITCHI022750.m1.gene;LITCHI024820.m1.gene;LITCHI024832.m1.gene;LITCHI024832.m2.gene;LITCHI025375.m1.gene;LITCHI025678.m1.gene;LITCHI026651.m1.gene
ko00250	Alanine, aspartate and glutamate metabolism	0.0093	0.0068	1.36	0.0605484	0.313133	LITCHI003343.m6.gene;LITCHI004871.m4.gene;LITCHI007484.m1.gene;LITCHI007624.m3.gene;LITCHI007982.m1.gene;LITCHI008105.m1.gene;LITCHI009773.m1.gene;LITCHI010659.m1.gene;LITCHI010919.m1.gene;LITCHI016661.m1.gene;LITCHI016773.m1.gene;LITCHI016926.m1.gene;LITCHI017131.m1.gene;LITCHI019201.m6.gene;LITCHI020148.m1.gene;LITCHI020148.m5.gene;LITCHI020904.m1.gene;LITCHI022185.m1.gene;LITCHI022186.m1.gene;…
ko00780	Biotin metabolism	0.0046	0.003	1.53	0.07244	0.335955	LITCHI001178.m1.gene;LITCHI003412.m4.gene;LITCHI004740.m1.gene;LITCHI007084.m1.gene;LITCHI007925.m1.gene;LITCHI008624.m1.gene;LITCHI015839.m2.gene;LITCHI016353.m1.gene;LITCHI017490.m1.gene;LITCHI021386.m1.gene;LITCHI021898.m1.gene;LITCHI028839.m1.gene
ko01210	2-Oxocarboxylic acid metabolism	0.0162	0.0131	1.24	0.0730186	0.335955	LITCHI001377.m4.gene;LITCHI001691.m1.gene;LITCHI002158.m1.gene;LITCHI002204.m1.gene;LITCHI004325.m1.gene;LITCHI004871.m4.gene;LITCHI005027.m1.gene;LITCHI005872.m3.gene;LITCHI006357.m1.gene;LITCHI006396.m1.gene;LITCHI007122.m1.gene;LITCHI008074.m1.gene;LITCHI009816.m1.gene;LITCHI010769.m1.gene;LITCHI010771.m10.gene;LITCHI010771.m12.gene;LITCHI011224.m1.gene;LITCHI011549.m1.gene;LITCHI014085.m1.gen…
ko03050	Proteasome	0.0154	0.0124	1.24	0.0734344	0.335955	LITCHI001007.m1.gene;LITCHI002018.m1.gene;LITCHI002050.m1.gene;LITCHI003267.m1.gene;LITCHI004127.m1.gene;LITCHI004253.m1.gene;LITCHI004702.m1.gene;LITCHI006444.m1.gene;LITCHI007675.m1.gene;LITCHI008486.m1.gene;LITCHI009610.m1.gene;LITCHI009707.m1.gene;LITCHI010242.m1.gene;LITCHI010266.m1.gene;LITCHI011528.m1.gene;LITCHI011909.m1.gene;LITCHI012618.m1.gene;LITCHI013620.m1.gene;LITCHI014843.m1.gene;…
ko00290	Valine, leucine and isoleucine biosynthesis	0.0058	0.0041	1.43	0.0844809	0.372177	LITCHI001377.m4.gene;LITCHI007122.m1.gene;LITCHI010769.m1.gene;LITCHI010771.m10.gene;LITCHI010771.m12.gene;LITCHI011549.m1.gene;LITCHI015197.m1.gene;LITCHI015202.m1.gene;LITCHI015606.m1.gene;LITCHI015811.m1.gene;LITCHI015819.m1.gene;LITCHI020938.m1.gene;LITCHI028378.m2.gene;LITCHI029046.m1.gene;LITCHI029048.m1.gene
ko00240	Pyrimidine metabolism	0.0131	0.0106	1.24	0.0981015	0.416747	LITCHI001268.m1.gene;LITCHI005411.m1.gene;LITCHI006652.m1.gene;LITCHI007624.m3.gene;LITCHI008696.m1.gene;LITCHI009812.m1.gene;LITCHI010293.m1.gene;LITCHI010749.m1.gene;LITCHI012648.m1.gene;LITCHI014234.m1.gene;LITCHI014618.m1.gene;LITCHI014785.m3.gene;LITCHI015285.m1.gene;LITCHI015561.m1.gene;LITCHI016661.m1.gene;LITCHI017636.m1.gene;LITCHI017849.m1.gene;LITCHI018335.m3.gene;LITCHI018758.m2.gene;…
ko00750	Vitamin B6 metabolism	0.0027	0.0016	1.65	0.110689	0.454006	LITCHI010615.m1.gene;LITCHI012377.m1.gene;LITCHI017652.m1.gene;LITCHI017655.m1.gene;LITCHI024720.m1.gene;LITCHI030035.m1.gene;LITCHI030036.m1.gene
ko00195	Photosynthesis	0.0073	0.0056	1.31	0.119969	0.470783	LITCHI005200.m1.gene;LITCHI006104.m1.gene;LITCHI007476.m1.gene;LITCHI008587.m1.gene;LITCHI013352.m1.gene;LITCHI014769.m1.gene;LITCHI020176.m1.gene;LITCHI020185.m1.gene;LITCHI020407.m1.gene;LITCHI021604.m1.gene;LITCHI026118.m1.gene;LITCHI027106.m1.gene;LITCHI027792.m1.gene;LITCHI028001.m1.gene;LITCHI028672.m1.gene;LITCHI028705.m1.gene;LITCHI029399.m1.gene;LITCHI030580.m1.gene;LITCHI030585.m1.gene
ko00740	Riboflavin metabolism	0.0046	0.0033	1.41	0.122695	0.470783	LITCHI005947.m1.gene;LITCHI005947.m2.gene;LITCHI007263.m1.gene;LITCHI008696.m1.gene;LITCHI015552.m1.gene;LITCHI017636.m1.gene;LITCHI023015.m1.gene;LITCHI023016.m1.gene;LITCHI024828.m1.gene;LITCHI025629.m1.gene;LITCHI025682.m1.gene;LITCHI027987.m1.gene
ko00400	Phenylalanine, tyrosine and tryptophan biosynthesis	0.0093	0.0074	1.25	0.134617	0.482818	LITCHI003790.m1.gene;LITCHI003791.m1.gene;LITCHI003792.m1.gene;LITCHI005942.m1.gene;LITCHI006432.m1.gene;LITCHI013063.m1.gene;LITCHI013419.m1.gene;LITCHI015680.m1.gene;LITCHI016773.m1.gene;LITCHI016888.m1.gene;LITCHI016926.m1.gene;LITCHI017131.m1.gene;LITCHI018647.m1.gene;LITCHI019253.m1.gene;LITCHI020904.m1.gene;LITCHI021008.m1.gene;LITCHI021369.m1.gene;LITCHI022417.m1.gene;LITCHI024511.m1.gene;…
ko04146	Peroxisome	0.0193	0.0167	1.16	0.135257	0.482818	LITCHI001741.m1.gene;LITCHI001741.m2.gene;LITCHI001878.m1.gene;LITCHI003782.m1.gene;LITCHI003953.m1.gene;LITCHI004015.m1.gene;LITCHI004598.m1.gene;LITCHI004942.m1.gene;LITCHI007975.m1.gene;LITCHI008074.m1.gene;LITCHI009684.m1.gene;LITCHI009816.m1.gene;LITCHI009819.m1.gene;LITCHI009830.m1.gene;LITCHI009991.m13.gene;LITCHI011239.m4.gene;LITCHI014460.m1.gene;LITCHI014759.m1.gene;LITCHI014958.m1.gene…
ko00260	Glycine, serine and threonine metabolism	0.0131	0.011	1.2	0.138009	0.482818	LITCHI000289.m1.gene;LITCHI000391.m1.gene;LITCHI002037.m1.gene;LITCHI003536.m1.gene;LITCHI004871.m4.gene;LITCHI004874.m1.gene;LITCHI004875.m1.gene;LITCHI005872.m3.gene;LITCHI006811.m1.gene;LITCHI007175.m2.gene;LITCHI007971.m1.gene;LITCHI011840.m1.gene;LITCHI013419.m1.gene;LITCHI014314.m1.gene;LITCHI014393.m1.gene;LITCHI014772.m1.gene;LITCHI016448.m1.gene;LITCHI016562.m1.gene;LITCHI019253.m1.gene;…
ko00900	Terpenoid backbone biosynthesis	0.01	0.0082	1.22	0.146659	0.488623	LITCHI001791.m1.gene;LITCHI002083.m1.gene;LITCHI002554.m1.gene;LITCHI003953.m1.gene;LITCHI005442.m1.gene;LITCHI005442.m10.gene;LITCHI006290.m1.gene;LITCHI007204.m1.gene;LITCHI008170.m1.gene;LITCHI008175.m1.gene;LITCHI008209.m1.gene;LITCHI009710.m1.gene;LITCHI012621.m1.gene;LITCHI013583.m2.gene;LITCHI014609.m1.gene;LITCHI017048.m1.gene;LITCHI019250.m1.gene;LITCHI019799.m2.gene;LITCHI021187.m1.gene…
ko04712	Circadian rhythm - plant	0.0135	0.0114	1.19	0.147884	0.488623	LITCHI001957.m1.gene;LITCHI003303.m1.gene;LITCHI003699.m1.gene;LITCHI003699.m2.gene;LITCHI005188.m1.gene;LITCHI005542.m1.gene;LITCHI005866.m1.gene;LITCHI006903.m1.gene;LITCHI007033.m1.gene;LITCHI007540.m1.gene;LITCHI009252.m1.gene;LITCHI009435.m1.gene;LITCHI010952.m1.gene;LITCHI010968.m1.gene;LITCHI011520.m1.gene;LITCHI012124.m1.gene;LITCHI013124.m1.gene;LITCHI014363.m1.gene;LITCHI015320.m1.gene;…
ko00051	Fructose and mannose metabolism	0.017	0.0147	1.16	0.154607	0.49703	LITCHI000135.m1.gene;LITCHI000461.m1.gene;LITCHI000564.m1.gene;LITCHI000575.m10.gene;LITCHI000575.m4.gene;LITCHI001273.m1.gene;LITCHI001964.m1.gene;LITCHI005338.m1.gene;LITCHI005683.m1.gene;LITCHI006594.m1.gene;LITCHI008462.m3.gene;LITCHI008992.m1.gene;LITCHI009230.m2.gene;LITCHI009264.m1.gene;LITCHI009266.m1.gene;LITCHI010132.m1.gene;LITCHI010259.m1.gene;LITCHI010554.m1.gene;LITCHI010602.m1.gene…
ko00920	Sulfur metabolism	0.0073	0.0059	1.25	0.167453	0.524159	LITCHI003695.m1.gene;LITCHI003714.m1.gene;LITCHI003716.m1.gene;LITCHI003717.m1.gene;LITCHI003717.m3.gene;LITCHI003717.m4.gene;LITCHI003717.m7.gene;LITCHI003718.m1.gene;LITCHI003719.m1.gene;LITCHI006356.m1.gene;LITCHI006483.m1.gene;LITCHI007060.m1.gene;LITCHI007063.m20.gene;LITCHI007489.m1.gene;LITCHI009709.m1.gene;LITCHI012600.m1.gene;LITCHI015457.m1.gene;LITCHI019502.m1.gene;LITCHI029272.m1.gene
ko00300	Lysine biosynthesis	0.0031	0.0022	1.43	0.177172	0.533664	LITCHI001849.m1.gene;LITCHI005872.m3.gene;LITCHI010397.m1.gene;LITCHI011840.m1.gene;LITCHI018476.m1.gene;LITCHI018481.m1.gene;LITCHI020829.m1.gene;LITCHI023846.m1.gene
ko00100	Steroid biosynthesis	0.0081	0.0066	1.22	0.182579	0.533664	LITCHI001516.m1.gene;LITCHI001907.m1.gene;LITCHI004418.m2.gene;LITCHI006072.m1.gene;LITCHI008422.m1.gene;LITCHI008706.m1.gene;LITCHI010053.m1.gene;LITCHI012423.m1.gene;LITCHI017422.m1.gene;LITCHI018779.m1.gene;LITCHI020727.m1.gene;LITCHI021690.m1.gene;LITCHI021710.m1.gene;LITCHI021716.m1.gene;LITCHI022604.m1.gene;LITCHI022870.m1.gene;LITCHI023224.m1.gene;LITCHI024971.m1.gene;LITCHI026972.m13.gene…
ko00640	Propanoate metabolism	0.0077	0.0063	1.23	0.183949	0.533664	LITCHI001289.m1.gene;LITCHI010435.m1.gene;LITCHI011361.m1.gene;LITCHI014314.m1.gene;LITCHI014393.m1.gene;LITCHI014463.m1.gene;LITCHI016488.m1.gene;LITCHI016710.m1.gene;LITCHI018188.m1.gene;LITCHI018269.m1.gene;LITCHI019860.m1.gene;LITCHI020974.m1.gene;LITCHI022806.m6.gene;LITCHI023532.m1.gene;LITCHI024252.m2.gene;LITCHI024310.m1.gene;LITCHI025276.m1.gene;LITCHI025412.m1.gene;LITCHI025701.m1.gene;…
ko00604	Glycosphingolipid biosynthesis - ganglio series	0.0054	0.0042	1.28	0.188998	0.535258	LITCHI004156.m1.gene;LITCHI006241.m1.gene;LITCHI006542.m1.gene;LITCHI010336.m1.gene;LITCHI011273.m1.gene;LITCHI016576.m1.gene;LITCHI016577.m1.gene;LITCHI020985.m1.gene;LITCHI023000.m1.gene;LITCHI024725.m1.gene;LITCHI026165.m1.gene;LITCHI026392.m1.gene;LITCHI030086.m1.gene;LITCHI030117.m1.gene
ko00513	Various types of N-glycan biosynthesis	0.0069	0.0057	1.22	0.205705	0.56354	LITCHI001607.m1.gene;LITCHI001775.m1.gene;LITCHI002166.m1.gene;LITCHI006691.m1.gene;LITCHI009920.m1.gene;LITCHI009929.m1.gene;LITCHI012851.m1.gene;LITCHI012898.m2.gene;LITCHI013311.m1.gene;LITCHI013825.m1.gene;LITCHI017478.m1.gene;LITCHI017757.m1.gene;LITCHI020035.m1.gene;LITCHI021482.m1.gene;LITCHI023531.m1.gene;LITCHI026015.m1.gene;LITCHI027122.m1.gene;LITCHI027857.m1.gene
ko00220	Arginine biosynthesis	0.0062	0.005	1.23	0.209015	0.56354	LITCHI001691.m1.gene;LITCHI002204.m1.gene;LITCHI003343.m6.gene;LITCHI004722.m1.gene;LITCHI004871.m4.gene;LITCHI008105.m1.gene;LITCHI010264.m1.gene;LITCHI010659.m1.gene;LITCHI011224.m1.gene;LITCHI016773.m1.gene;LITCHI016926.m1.gene;LITCHI017131.m1.gene;LITCHI018429.m1.gene;LITCHI020904.m1.gene;LITCHI022601.m1.gene;LITCHI025524.m1.gene
ko00730	Thiamine metabolism	0.0046	0.0036	1.28	0.213198	0.56354	LITCHI000425.m1.gene;LITCHI003526.m1.gene;LITCHI004714.m1.gene;LITCHI007204.m1.gene;LITCHI011689.m1.gene;LITCHI013397.m1.gene;LITCHI013400.m1.gene;LITCHI014609.m1.gene;LITCHI017048.m1.gene;LITCHI018526.m1.gene;LITCHI025069.m1.gene;LITCHI027346.m1.gene
ko03060	Protein export	0.0104	0.009	1.16	0.219009	0.565399	LITCHI003633.m1.gene;LITCHI003931.m1.gene;LITCHI004681.m1.gene;LITCHI004753.m1.gene;LITCHI005689.m1.gene;LITCHI007627.m3.gene;LITCHI009409.m1.gene;LITCHI011102.m1.gene;LITCHI011292.m1.gene;LITCHI011294.m1.gene;LITCHI011296.m1.gene;LITCHI012388.m1.gene;LITCHI012800.m1.gene;LITCHI012992.m1.gene;LITCHI016079.m1.gene;LITCHI016657.m1.gene;LITCHI020758.m1.gene;LITCHI021878.m1.gene;LITCHI021942.m1.gene;…
ko00531	Glycosaminoglycan degradation	0.0073	0.0061	1.2	0.223408	0.565399	LITCHI004156.m1.gene;LITCHI006241.m1.gene;LITCHI006542.m1.gene;LITCHI010336.m1.gene;LITCHI011273.m1.gene;LITCHI014496.m1.gene;LITCHI016576.m1.gene;LITCHI016577.m1.gene;LITCHI017276.m1.gene;LITCHI017277.m1.gene;LITCHI018664.m5.gene;LITCHI020985.m1.gene;LITCHI022298.m1.gene;LITCHI023000.m1.gene;LITCHI024725.m1.gene;LITCHI026165.m1.gene;LITCHI026392.m1.gene;LITCHI030086.m1.gene;LITCHI030117.m1.gene
ko00960	Tropane, piperidine and pyridine alkaloid biosynthesis	0.0066	0.0054	1.21	0.228425	0.566053	LITCHI004874.m1.gene;LITCHI004875.m1.gene;LITCHI013063.m1.gene;LITCHI014772.m1.gene;LITCHI016773.m1.gene;LITCHI016926.m1.gene;LITCHI017131.m1.gene;LITCHI018353.m1.gene;LITCHI020904.m1.gene;LITCHI021008.m1.gene;LITCHI022471.m2.gene;LITCHI022850.m1.gene;LITCHI024964.m1.gene;LITCHI024965.m1.gene;LITCHI024968.m1.gene;LITCHI024969.m1.gene;LITCHI027660.m1.gene
ko00760	Nicotinate and nicotinamide metabolism	0.0058	0.0047	1.22	0.233212	0.566122	LITCHI006902.m1.gene;LITCHI008696.m1.gene;LITCHI010293.m1.gene;LITCHI011289.m2.gene;LITCHI012707.m1.gene;LITCHI014234.m1.gene;LITCHI014618.m1.gene;LITCHI014785.m3.gene;LITCHI015561.m1.gene;LITCHI017636.m1.gene;LITCHI021876.m1.gene;LITCHI022501.m1.gene;LITCHI023907.m1.gene;LITCHI023910.m1.gene;LITCHI027987.m1.gene
ko00053	Ascorbate and aldarate metabolism	0.0108	0.0095	1.14	0.248718	0.591687	LITCHI002021.m1.gene;LITCHI003640.m1.gene;LITCHI004973.m1.gene;LITCHI004975.m2.gene;LITCHI006043.m1.gene;LITCHI007166.m1.gene;LITCHI007382.m1.gene;LITCHI007899.m1.gene;LITCHI011263.m1.gene;LITCHI011264.m1.gene;LITCHI014486.m1.gene;LITCHI016435.m1.gene;LITCHI016989.m1.gene;LITCHI017698.m1.gene;LITCHI018535.m1.gene;LITCHI019406.m1.gene;LITCHI020615.m1.gene;LITCHI020828.m1.gene;LITCHI022041.m1.gene;…
ko00350	Tyrosine metabolism	0.0104	0.0092	1.13	0.269967	0.617952	LITCHI001238.m1.gene;LITCHI001240.m1.gene;LITCHI003008.m1.gene;LITCHI003011.m1.gene;LITCHI003012.m1.gene;LITCHI004874.m1.gene;LITCHI004875.m1.gene;LITCHI009351.m1.gene;LITCHI010561.m1.gene;LITCHI013042.m2.gene;LITCHI013063.m1.gene;LITCHI014461.m1.gene;LITCHI014772.m1.gene;LITCHI016773.m1.gene;LITCHI016926.m1.gene;LITCHI017131.m1.gene;LITCHI018102.m1.gene;LITCHI020157.m1.gene;LITCHI020904.m1.gene;…
ko04120	Ubiquitin mediated proteolysis	0.0247	0.0229	1.08	0.272171	0.617952	LITCHI000549.m1.gene;LITCHI001237.m1.gene;LITCHI001780.m1.gene;LITCHI001874.m1.gene;LITCHI002029.m1.gene;LITCHI002038.m1.gene;LITCHI002046.m1.gene;LITCHI002966.m1.gene;LITCHI004096.m2.gene;LITCHI004971.m1.gene;LITCHI005152.m1.gene;LITCHI005157.m1.gene;LITCHI006690.m1.gene;LITCHI007090.m1.gene;LITCHI007472.m1.gene;LITCHI007572.m1.gene;LITCHI008317.m1.gene;LITCHI009258.m1.gene;LITCHI010936.m1.gene;…
ko00966	Glucosinolate biosynthesis	0.0035	0.0028	1.26	0.275344	0.617952	LITCHI001377.m4.gene;LITCHI005027.m1.gene;LITCHI007122.m1.gene;LITCHI010769.m1.gene;LITCHI010771.m10.gene;LITCHI010771.m12.gene;LITCHI015197.m1.gene;LITCHI015202.m1.gene;LITCHI022315.m1.gene
ko00590	Arachidonic acid metabolism	0.005	0.0042	1.19	0.290437	0.623879	LITCHI001878.m1.gene;LITCHI008706.m1.gene;LITCHI014460.m1.gene;LITCHI015841.m1.gene;LITCHI021071.m1.gene;LITCHI021074.m1.gene;LITCHI022143.m1.gene;LITCHI026432.m1.gene;LITCHI026471.m1.gene;LITCHI026473.m1.gene;LITCHI029235.m1.gene;LITCHI029236.m1.gene;LITCHI029237.m1.gene
ko00511	Other glycan degradation	0.0116	0.0104	1.11	0.291354	0.623879	LITCHI000775.m1.gene;LITCHI000777.m1.gene;LITCHI000781.m1.gene;LITCHI000790.m1.gene;LITCHI000791.m1.gene;LITCHI000792.m1.gene;LITCHI000795.m1.gene;LITCHI000802.m1.gene;LITCHI000803.m1.gene;LITCHI001499.m1.gene;LITCHI004156.m1.gene;LITCHI006241.m1.gene;LITCHI006542.m1.gene;LITCHI009030.m1.gene;LITCHI010336.m1.gene;LITCHI011273.m1.gene;LITCHI011796.m1.gene;LITCHI016576.m1.gene;LITCHI016577.m1.gene;…
ko04141	Protein processing in endoplasmic reticulum	0.0409	0.0389	1.05	0.29372	0.623879	LITCHI000325.m1.gene;LITCHI000384.m1.gene;LITCHI000642.m1.gene;LITCHI001775.m1.gene;LITCHI001881.m1.gene;LITCHI001881.m5.gene;LITCHI001934.m1.gene;LITCHI002029.m1.gene;LITCHI002038.m1.gene;LITCHI003611.m1.gene;LITCHI003652.m1.gene;LITCHI004096.m2.gene;LITCHI004134.m1.gene;LITCHI004472.m1.gene;LITCHI004682.m1.gene;LITCHI005176.m1.gene;LITCHI005385.m1.gene;LITCHI005719.m1.gene;LITCHI005747.m1.gene;…
ko03018	RNA degradation	0.022	0.0205	1.07	0.299673	0.624388	LITCHI001324.m1.gene;LITCHI002898.m1.gene;LITCHI003389.m1.gene;LITCHI003415.m1.gene;LITCHI003416.m1.gene;LITCHI003520.m1.gene;LITCHI004391.m1.gene;LITCHI005048.m1.gene;LITCHI006309.m1.gene;LITCHI006916.m1.gene;LITCHI008415.m1.gene;LITCHI008992.m1.gene;LITCHI010501.m1.gene;LITCHI010554.m1.gene;LITCHI010602.m1.gene;LITCHI010944.m1.gene;LITCHI012420.m1.gene;LITCHI012539.m2.gene;LITCHI013695.m1.gene;…
ko00905	Brassinosteroid biosynthesis	0.0039	0.0032	1.21	0.304458	0.624388	LITCHI002547.m1.gene;LITCHI002548.m1.gene;LITCHI002550.m1.gene;LITCHI006545.m1.gene;LITCHI009147.m1.gene;LITCHI018270.m1.gene;LITCHI021529.m3.gene;LITCHI027343.m1.gene;LITCHI030056.m1.gene;LITCHI030223.m1.gene
ko00563	Glycosylphosphatidylinositol (GPI)-anchor biosynthesis	0.005	0.0043	1.16	0.318114	0.63135	LITCHI003598.m2.gene;LITCHI003598.m6.gene;LITCHI006324.m1.gene;LITCHI010127.m1.gene;LITCHI017978.m1.gene;LITCHI017979.m1.gene;LITCHI020590.m2.gene;LITCHI022312.m1.gene;LITCHI022962.m1.gene;LITCHI024650.m1.gene;LITCHI026932.m1.gene;LITCHI026936.m1.gene;LITCHI026937.m1.gene
ko00514	Other types of O-glycan biosynthesis	0.0027	0.0022	1.25	0.318468	0.63135	LITCHI016954.m1.gene;LITCHI017860.m1.gene;LITCHI018904.m1.gene;LITCHI018905.m1.gene;LITCHI019956.m1.gene;LITCHI020668.m1.gene;LITCHI022959.m1.gene
ko03020	RNA polymerase	0.0058	0.0051	1.14	0.332654	0.648661	LITCHI001293.m1.gene;LITCHI004922.m1.gene;LITCHI005644.m1.gene;LITCHI007748.m1.gene;LITCHI008961.m1.gene;LITCHI011131.m1.gene;LITCHI017550.m1.gene;LITCHI019913.m2.gene;LITCHI019913.m8.gene;LITCHI024181.m1.gene;LITCHI024787.m1.gene;LITCHI024977.m1.gene;LITCHI026120.m1.gene;LITCHI028706.m1.gene;LITCHI030454.m1.gene
ko04136	Autophagy - other	0.0054	0.0048	1.12	0.366823	0.689545	LITCHI001636.m1.gene;LITCHI004928.m1.gene;LITCHI008660.m1.gene;LITCHI008666.m1.gene;LITCHI018061.m1.gene;LITCHI019070.m1.gene;LITCHI019434.m1.gene;LITCHI022255.m1.gene;LITCHI022532.m1.gene;LITCHI022802.m1.gene;LITCHI024245.m1.gene;LITCHI024571.m1.gene;LITCHI025159.m1.gene;LITCHI026663.m1.gene
ko00030	Pentose phosphate pathway	0.0154	0.0146	1.06	0.369778	0.689545	LITCHI000135.m1.gene;LITCHI000461.m1.gene;LITCHI000575.m10.gene;LITCHI000575.m4.gene;LITCHI001273.m1.gene;LITCHI003187.m1.gene;LITCHI005339.m1.gene;LITCHI005406.m1.gene;LITCHI005683.m1.gene;LITCHI005724.m1.gene;LITCHI005827.m1.gene;LITCHI008077.m1.gene;LITCHI008992.m1.gene;LITCHI009142.m1.gene;LITCHI010318.m1.gene;LITCHI010554.m1.gene;LITCHI010602.m1.gene;LITCHI010632.m1.gene;LITCHI011166.m1.gene…
ko04075	Plant hormone signal transduction	0.0637	0.0621	1.02	0.371012	0.689545	LITCHI000318.m1.gene;LITCHI000401.m1.gene;LITCHI000426.m1.gene;LITCHI001025.m1.gene;LITCHI001308.m1.gene;LITCHI001381.m1.gene;LITCHI001383.m1.gene;LITCHI001602.m1.gene;LITCHI001687.m1.gene;LITCHI001946.m1.gene;LITCHI002133.m1.gene;LITCHI002139.m1.gene;LITCHI002883.m1.gene;LITCHI003581.m1.gene;LITCHI003861.m1.gene;LITCHI004564.m4.gene;LITCHI004632.m1.gene;LITCHI004641.m1.gene;LITCHI004771.m1.gene;…
ko00071	Fatty acid degradation	0.0093	0.0087	1.06	0.405237	0.741567	LITCHI001741.m1.gene;LITCHI001741.m2.gene;LITCHI003008.m1.gene;LITCHI003011.m1.gene;LITCHI003012.m1.gene;LITCHI004015.m1.gene;LITCHI004973.m1.gene;LITCHI004975.m2.gene;LITCHI007382.m1.gene;LITCHI009218.m1.gene;LITCHI009351.m1.gene;LITCHI010561.m1.gene;LITCHI011239.m4.gene;LITCHI011264.m1.gene;LITCHI014486.m1.gene;LITCHI014759.m1.gene;LITCHI014958.m1.gene;LITCHI018188.m1.gene;LITCHI020974.m1.gene;…
ko00340	Histidine metabolism	0.0042	0.0039	1.09	0.425193	0.766297	LITCHI000122.m1.gene;LITCHI004973.m1.gene;LITCHI004975.m2.gene;LITCHI006246.m1.gene;LITCHI007382.m1.gene;LITCHI011264.m1.gene;LITCHI011436.m1.gene;LITCHI013925.m1.gene;LITCHI014486.m1.gene;LITCHI022360.m1.gene;LITCHI030211.m1.gene
ko00261	Monobactam biosynthesis	0.0015	0.0013	1.19	0.441073	0.776274	LITCHI005872.m3.gene;LITCHI006483.m1.gene;LITCHI011840.m1.gene;LITCHI020829.m1.gene
ko00510	N-Glycan biosynthesis	0.0085	0.0081	1.05	0.443781	0.776274	LITCHI001775.m1.gene;LITCHI002166.m1.gene;LITCHI004682.m1.gene;LITCHI006691.m1.gene;LITCHI007392.m1.gene;LITCHI008787.m1.gene;LITCHI009920.m1.gene;LITCHI009929.m1.gene;LITCHI012851.m1.gene;LITCHI012898.m2.gene;LITCHI013311.m1.gene;LITCHI017478.m1.gene;LITCHI017757.m1.gene;LITCHI018398.m1.gene;LITCHI018556.m1.gene;LITCHI019739.m1.gene;LITCHI020035.m1.gene;LITCHI021482.m1.gene;LITCHI023531.m1.gene;…
ko00670	One carbon pool by folate	0.0039	0.0036	1.06	0.47039	0.805227	LITCHI000289.m1.gene;LITCHI000391.m1.gene;LITCHI007175.m2.gene;LITCHI011506.m1.gene;LITCHI022252.m1.gene;LITCHI022884.m1.gene;LITCHI024188.m1.gene;LITCHI025670.m1.gene;LITCHI026422.m1.gene;LITCHI028339.m1.gene
ko03450	Non-homologous end-joining	0.0019	0.0017	1.12	0.473873	0.805227	LITCHI012787.m1.gene;LITCHI014992.m1.gene;LITCHI016437.m1.gene;LITCHI025553.m1.gene;LITCHI025554.m1.gene
ko00950	Isoquinoline alkaloid biosynthesis	0.0066	0.0064	1.03	0.495108	0.811338	LITCHI004874.m1.gene;LITCHI004875.m1.gene;LITCHI008142.m1.gene;LITCHI009237.m1.gene;LITCHI013063.m1.gene;LITCHI014772.m1.gene;LITCHI016773.m1.gene;LITCHI016926.m1.gene;LITCHI017131.m1.gene;LITCHI017279.m1.gene;LITCHI020904.m1.gene;LITCHI021008.m1.gene;LITCHI021086.m1.gene;LITCHI022471.m2.gene;LITCHI022850.m1.gene;LITCHI025940.m1.gene;LITCHI031810.m1.gene
ko00196	Photosynthesis - antenna proteins	0.0015	0.0014	1.12	0.495681	0.811338	LITCHI000053.m1.gene;LITCHI001179.m1.gene;LITCHI020132.m1.gene;LITCHI027345.m1.gene
ko00561	Glycerolipid metabolism	0.017	0.0168	1.01	0.501167	0.811338	LITCHI001763.m1.gene;LITCHI002077.m1.gene;LITCHI002146.m1.gene;LITCHI003501.m1.gene;LITCHI004831.m1.gene;LITCHI004973.m1.gene;LITCHI004975.m2.gene;LITCHI006025.m1.gene;LITCHI007382.m1.gene;LITCHI008706.m1.gene;LITCHI011264.m1.gene;LITCHI011728.m1.gene;LITCHI012921.m1.gene;LITCHI013258.m1.gene;LITCHI013310.m1.gene;LITCHI014013.m1.gene;LITCHI014293.m1.gene;LITCHI014486.m1.gene;LITCHI017290.m1.gene;…
ko00650	Butanoate metabolism	0.0046	0.0045	1.03	0.504753	0.811338	LITCHI004592.m1.gene;LITCHI006359.m1.gene;LITCHI009773.m1.gene;LITCHI013085.m1.gene;LITCHI014398.m1.gene;LITCHI015606.m1.gene;LITCHI019201.m6.gene;LITCHI020148.m1.gene;LITCHI020148.m5.gene;LITCHI021544.m2.gene;LITCHI022941.m1.gene;LITCHI023839.m1.gene
ko02010	ABC transporters	0.0139	0.0138	1.01	0.514445	0.815892	LITCHI004747.m1.gene;LITCHI007173.m1.gene;LITCHI007975.m1.gene;LITCHI008826.m1.gene;LITCHI009272.m1.gene;LITCHI009819.m1.gene;LITCHI010096.m1.gene;LITCHI013650.m1.gene;LITCHI014232.m1.gene;LITCHI014233.m1.gene;LITCHI014263.m1.gene;LITCHI014268.m3.gene;LITCHI014490.m1.gene;LITCHI016504.m2.gene;LITCHI016696.m1.gene;LITCHI017061.m2.gene;LITCHI018643.m1.gene;LITCHI018804.m1.gene;LITCHI019020.m1.gene;…
ko00500	Starch and sucrose metabolism	0.0413	0.0415	0.99	0.543541	0.850694	LITCHI000072.m1.gene;LITCHI000488.m1.gene;LITCHI000510.m1.gene;LITCHI001776.m1.gene;LITCHI001842.m1.gene;LITCHI001925.m1.gene;LITCHI002286.m1.gene;LITCHI002585.m1.gene;LITCHI002592.m1.gene;LITCHI002605.m1.gene;LITCHI002757.m1.gene;LITCHI002806.m1.gene;LITCHI003189.m1.gene;LITCHI004805.m1.gene;LITCHI004984.m1.gene;LITCHI005302.m1.gene;LITCHI005338.m1.gene;LITCHI005827.m1.gene;LITCHI005830.m1.gene;…
ko03008	Ribosome biogenesis in eukaryotes	0.017	0.0173	0.98	0.592046	0.894322	LITCHI001879.m1.gene;LITCHI002898.m1.gene;LITCHI003342.m1.gene;LITCHI004030.m1.gene;LITCHI004061.m1.gene;LITCHI004063.m1.gene;LITCHI004888.m1.gene;LITCHI005125.m1.gene;LITCHI006101.m1.gene;LITCHI006183.m1.gene;LITCHI006299.m1.gene;LITCHI007033.m1.gene;LITCHI007336.m1.gene;LITCHI009436.m1.gene;LITCHI010662.m1.gene;LITCHI011424.m1.gene;LITCHI011524.m1.gene;LITCHI011525.m1.gene;LITCHI011526.m1.gene;…
ko00660	C5-Branched dibasic acid metabolism	0.0019	0.002	0.97	0.609453	0.894322	LITCHI011549.m1.gene;LITCHI015197.m1.gene;LITCHI015202.m1.gene;LITCHI015606.m1.gene;LITCHI028378.m2.gene
ko00402	Benzoxazinoid biosynthesis	0.0023	0.0024	0.96	0.620415	0.894322	LITCHI005854.m1.gene;LITCHI005856.m1.gene;LITCHI015343.m1.gene;LITCHI015358.m1.gene;LITCHI015359.m1.gene;LITCHI029995.m1.gene
ko00520	Amino sugar and nucleotide sugar metabolism	0.0274	0.0284	0.97	0.656335	0.894322	LITCHI001164.m1.gene;LITCHI001453.m1.gene;LITCHI001842.m1.gene;LITCHI002110.m1.gene;LITCHI002114.m1.gene;LITCHI002117.m1.gene;LITCHI002800.m1.gene;LITCHI003265.m1.gene;LITCHI003296.m1.gene;LITCHI003340.m1.gene;LITCHI003640.m1.gene;LITCHI005338.m1.gene;LITCHI005827.m1.gene;LITCHI006364.m1.gene;LITCHI007166.m1.gene;LITCHI007167.m1.gene;LITCHI008049.m1.gene;LITCHI008052.m1.gene;LITCHI008462.m3.gene;…
ko00480	Glutathione metabolism	0.0139	0.0147	0.95	0.674802	0.894322	LITCHI002021.m1.gene;LITCHI002997.m1.gene;LITCHI003148.m1.gene;LITCHI003150.m1.gene;LITCHI003163.m1.gene;LITCHI005406.m1.gene;LITCHI006043.m1.gene;LITCHI008070.m1.gene;LITCHI008074.m1.gene;LITCHI008128.m1.gene;LITCHI009816.m1.gene;LITCHI011209.m3.gene;LITCHI011263.m1.gene;LITCHI012572.m1.gene;LITCHI012648.m1.gene;LITCHI015148.m1.gene;LITCHI015149.m1.gene;LITCHI015153.m1.gene;LITCHI015161.m1.gene;…
ko00564	Glycerophospholipid metabolism	0.0162	0.0172	0.94	0.692685	0.894322	LITCHI001196.m1.gene;LITCHI001763.m1.gene;LITCHI002035.m1.gene;LITCHI002146.m1.gene;LITCHI003114.m1.gene;LITCHI004213.m1.gene;LITCHI004455.m1.gene;LITCHI006390.m1.gene;LITCHI008706.m1.gene;LITCHI010805.m1.gene;LITCHI011530.m1.gene;LITCHI012921.m1.gene;LITCHI013258.m1.gene;LITCHI013310.m1.gene;LITCHI014013.m1.gene;LITCHI015176.m1.gene;LITCHI016649.m1.gene;LITCHI016870.m1.gene;LITCHI017033.m9.gene;…
ko00601	Glycosphingolipid biosynthesis - lacto and neolacto series	0.0004	0.0004	0.89	0.717994	0.894322	LITCHI018238.m1.gene
ko04144	Endocytosis	0.0285	0.0303	0.94	0.739781	0.894322	LITCHI000264.m1.gene;LITCHI000332.m1.gene;LITCHI000333.m1.gene;LITCHI000642.m1.gene;LITCHI000993.m1.gene;LITCHI001740.m1.gene;LITCHI001881.m1.gene;LITCHI001881.m5.gene;LITCHI002016.m1.gene;LITCHI002210.m1.gene;LITCHI002329.m1.gene;LITCHI002930.m1.gene;LITCHI003611.m1.gene;LITCHI004213.m1.gene;LITCHI004940.m1.gene;LITCHI005138.m1.gene;LITCHI005233.m1.gene;LITCHI005506.m1.gene;LITCHI005704.m1.gene;…
ko00052	Galactose metabolism	0.0174	0.0187	0.93	0.743368	0.894322	LITCHI003189.m1.gene;LITCHI003340.m1.gene;LITCHI004156.m1.gene;LITCHI004831.m1.gene;LITCHI005827.m1.gene;LITCHI006025.m1.gene;LITCHI006241.m1.gene;LITCHI006542.m1.gene;LITCHI008049.m1.gene;LITCHI008052.m1.gene;LITCHI008992.m1.gene;LITCHI010132.m1.gene;LITCHI010336.m1.gene;LITCHI010554.m1.gene;LITCHI010602.m1.gene;LITCHI011273.m1.gene;LITCHI012100.m1.gene;LITCHI013576.m1.gene;LITCHI013593.m1.gene;…
ko03015	mRNA surveillance pathway	0.0139	0.0151	0.92	0.743743	0.894322	LITCHI002791.m1.gene;LITCHI003264.m1.gene;LITCHI004372.m1.gene;LITCHI004391.m1.gene;LITCHI004806.m1.gene;LITCHI005501.m1.gene;LITCHI006155.m1.gene;LITCHI006916.m1.gene;LITCHI008149.m1.gene;LITCHI009209.m1.gene;LITCHI009360.m1.gene;LITCHI010311.m1.gene;LITCHI010444.m1.gene;LITCHI010944.m1.gene;LITCHI013504.m1.gene;LITCHI014330.m1.gene;LITCHI014369.m1.gene;LITCHI015326.m1.gene;LITCHI016821.m1.gene;…
ko03040	Spliceosome	0.0316	0.0336	0.94	0.749714	0.894322	LITCHI000047.m2.gene;LITCHI000642.m1.gene;LITCHI001186.m1.gene;LITCHI001881.m1.gene;LITCHI001881.m5.gene;LITCHI002899.m1.gene;LITCHI003238.m1.gene;LITCHI003611.m1.gene;LITCHI004308.m1.gene;LITCHI004516.m1.gene;LITCHI004516.m5.gene;LITCHI004530.m1.gene;LITCHI004900.m1.gene;LITCHI005147.m1.gene;LITCHI005429.m1.gene;LITCHI005904.m1.gene;LITCHI006096.m1.gene;LITCHI006155.m1.gene;LITCHI007516.m1.gene;…
ko00562	Inositol phosphate metabolism	0.0139	0.0153	0.91	0.768657	0.894322	LITCHI000264.m1.gene;LITCHI000332.m1.gene;LITCHI000333.m1.gene;LITCHI000993.m1.gene;LITCHI001289.m1.gene;LITCHI001964.m1.gene;LITCHI002035.m1.gene;LITCHI002633.m1.gene;LITCHI003114.m1.gene;LITCHI003930.m1.gene;LITCHI004928.m1.gene;LITCHI006111.m1.gene;LITCHI007463.m1.gene;LITCHI007489.m1.gene;LITCHI007923.m1.gene;LITCHI009208.m1.gene;LITCHI010753.m1.gene;LITCHI011169.m1.gene;LITCHI011588.m1.gene;…
ko00515	Mannose type O-glycan biosynthesis	0.0004	0.0005	0.75	0.781084	0.894322	LITCHI013911.m1.gene
ko00630	Glyoxylate and dicarboxylate metabolism	0.0158	0.0174	0.91	0.785295	0.894322	LITCHI000289.m1.gene;LITCHI000391.m1.gene;LITCHI000500.m1.gene;LITCHI000513.m1.gene;LITCHI001294.m1.gene;LITCHI002037.m1.gene;LITCHI004325.m1.gene;LITCHI004871.m4.gene;LITCHI006359.m1.gene;LITCHI006396.m1.gene;LITCHI007175.m2.gene;LITCHI007189.m1.gene;LITCHI008105.m1.gene;LITCHI009991.m13.gene;LITCHI012065.m1.gene;LITCHI012990.m1.gene;LITCHI014085.m1.gene;LITCHI014103.m1.gene;LITCHI014131.m1.gene…
ko04122	Sulfur relay system	0.0008	0.001	0.75	0.786419	0.894322	LITCHI009709.m1.gene;LITCHI011825.m1.gene
ko00310	Lysine degradation	0.0062	0.0072	0.86	0.788343	0.894322	LITCHI004973.m1.gene;LITCHI004975.m2.gene;LITCHI005206.m1.gene;LITCHI007382.m1.gene;LITCHI008515.m1.gene;LITCHI011264.m1.gene;LITCHI013926.m1.gene;LITCHI014314.m1.gene;LITCHI014393.m1.gene;LITCHI014486.m1.gene;LITCHI015189.m2.gene;LITCHI017457.m1.gene;LITCHI021193.m1.gene;LITCHI022360.m1.gene;LITCHI030211.m1.gene;Litchi_chinensis_newGene_4669
ko00902	Monoterpenoid biosynthesis	0.0019	0.0025	0.77	0.809694	0.894322	LITCHI007192.m1.gene;LITCHI007194.m1.gene;LITCHI025666.m1.gene;LITCHI029160.m1.gene;LITCHI029391.m1.gene
ko00592	alpha-Linolenic acid metabolism	0.0062	0.0073	0.84	0.819376	0.894322	LITCHI005484.m1.gene;LITCHI008706.m1.gene;LITCHI009351.m1.gene;LITCHI010012.m1.gene;LITCHI011712.m1.gene;LITCHI015176.m1.gene;LITCHI017545.m2.gene;LITCHI018188.m1.gene;LITCHI020912.m1.gene;LITCHI020974.m1.gene;LITCHI021330.m1.gene;LITCHI024090.m1.gene;LITCHI025884.m1.gene;LITCHI026124.m1.gene;LITCHI026964.m1.gene;LITCHI028057.m1.gene
ko00944	Flavone and flavonol biosynthesis	0.0023	0.003	0.77	0.826933	0.894322	LITCHI002308.m1.gene;LITCHI015421.m1.gene;LITCHI019347.m1.gene;LITCHI024776.m1.gene;LITCHI027152.m1.gene;LITCHI028325.m1.gene
ko00942	Anthocyanin biosynthesis	0.0004	0.0006	0.64	0.830063	0.894322	LITCHI013091.m1.gene
ko00603	Glycosphingolipid biosynthesis - globo and isoglobo series	0.0019	0.0026	0.75	0.83342	0.894322	LITCHI004831.m1.gene;LITCHI006025.m1.gene;LITCHI018238.m1.gene;LITCHI029251.m1.gene;LITCHI029252.m1.gene
ko00908	Zeatin biosynthesis	0.0073	0.0087	0.84	0.836376	0.894322	LITCHI003700.m1.gene;LITCHI003702.m1.gene;LITCHI003704.m1.gene;LITCHI003709.m1.gene;LITCHI008772.m1.gene;LITCHI008795.m1.gene;LITCHI010235.m1.gene;LITCHI010540.m1.gene;LITCHI012975.m1.gene;LITCHI012986.m1.gene;LITCHI015420.m1.gene;LITCHI015425.m1.gene;LITCHI017617.m1.gene;LITCHI018616.m1.gene;LITCHI018709.m1.gene;LITCHI018715.m1.gene;LITCHI019951.m5.gene;LITCHI024998.m1.gene;LITCHI025001.m1.gene
ko00130	Ubiquinone and other terpenoid-quinone biosynthesis	0.0077	0.0091	0.84	0.837529	0.894322	LITCHI001214.m6.gene;LITCHI013063.m1.gene;LITCHI013222.m1.gene;LITCHI014905.m1.gene;LITCHI016433.m1.gene;LITCHI019051.m1.gene;LITCHI020157.m1.gene;LITCHI020707.m1.gene;LITCHI021008.m1.gene;LITCHI022189.m1.gene;LITCHI022590.m1.gene;LITCHI022888.m1.gene;LITCHI022892.m1.gene;LITCHI023150.m1.gene;LITCHI024609.m1.gene;LITCHI025095.m1.gene;LITCHI026156.m1.gene;LITCHI028667.m1.gene;LITCHI030655.m1.gene;…
ko00906	Carotenoid biosynthesis	0.0077	0.0091	0.84	0.837529	0.894322	LITCHI001171.m1.gene;LITCHI001579.m1.gene;LITCHI001633.m1.gene;LITCHI002053.m1.gene;LITCHI002832.m1.gene;LITCHI003677.m1.gene;LITCHI006637.m1.gene;LITCHI009422.m1.gene;LITCHI010989.m1.gene;LITCHI015688.m1.gene;LITCHI015723.m1.gene;LITCHI016054.m1.gene;LITCHI017862.m1.gene;LITCHI019197.m1.gene;LITCHI019836.m1.gene;LITCHI022065.m1.gene;LITCHI022208.m1.gene;LITCHI022211.m1.gene;LITCHI023873.m1.gene;…
ko03410	Base excision repair	0.0062	0.0075	0.82	0.846941	0.894322	LITCHI006112.m1.gene;LITCHI006623.m1.gene;LITCHI006623.m2.gene;LITCHI006623.m4.gene;LITCHI009801.m1.gene;LITCHI010111.m1.gene;LITCHI010360.m1.gene;LITCHI011276.m1.gene;LITCHI019093.m1.gene;LITCHI020853.m1.gene;LITCHI020855.m1.gene;LITCHI021243.m1.gene;LITCHI023474.m1.gene;LITCHI023597.m1.gene;LITCHI026084.m1.gene;LITCHI028502.m1.gene
ko00073	Cutin, suberine and wax biosynthesis	0.0066	0.0079	0.83	0.847356	0.894322	LITCHI000948.m1.gene;LITCHI003555.m1.gene;LITCHI005851.m1.gene;LITCHI005929.m1.gene;LITCHI009218.m1.gene;LITCHI010249.m1.gene;LITCHI012373.m4.gene;LITCHI015234.m1.gene;LITCHI015977.m1.gene;LITCHI016914.m1.gene;LITCHI022092.m1.gene;LITCHI024478.m1.gene;LITCHI025287.m1.gene;LITCHI025290.m1.gene;LITCHI025291.m1.gene;LITCHI029559.m1.gene;LITCHI030125.m1.gene
ko00430	Taurine and hypotaurine metabolism	0.0008	0.0012	0.64	0.85468	0.894322	LITCHI020148.m1.gene;LITCHI020148.m5.gene
ko00360	Phenylalanine metabolism	0.0073	0.0089	0.82	0.860209	0.894322	LITCHI001200.m1.gene;LITCHI001979.m1.gene;LITCHI003947.m1.gene;LITCHI003952.m1.gene;LITCHI004874.m1.gene;LITCHI004875.m1.gene;LITCHI013063.m1.gene;LITCHI013085.m1.gene;LITCHI014772.m1.gene;LITCHI016773.m1.gene;LITCHI016926.m1.gene;LITCHI017131.m1.gene;LITCHI018102.m1.gene;LITCHI020157.m1.gene;LITCHI020904.m1.gene;LITCHI021008.m1.gene;LITCHI022471.m2.gene;LITCHI022850.m1.gene;LITCHI025940.m1.gene
ko00380	Tryptophan metabolism	0.0085	0.0103	0.83	0.87224	0.894322	LITCHI001200.m1.gene;LITCHI001979.m1.gene;LITCHI003947.m1.gene;LITCHI003952.m1.gene;LITCHI004973.m1.gene;LITCHI004975.m2.gene;LITCHI005027.m1.gene;LITCHI007382.m1.gene;LITCHI009991.m13.gene;LITCHI011264.m1.gene;LITCHI013926.m1.gene;LITCHI014314.m1.gene;LITCHI014393.m1.gene;LITCHI014486.m1.gene;LITCHI015165.m1.gene;LITCHI021050.m1.gene;LITCHI022315.m1.gene;LITCHI022360.m1.gene;LITCHI025940.m1.gene…
ko03430	Mismatch repair	0.0046	0.006	0.78	0.87471	0.894322	LITCHI003319.m1.gene;LITCHI011270.m1.gene;LITCHI011282.m1.gene;LITCHI011483.m1.gene;LITCHI022539.m1.gene;LITCHI023109.m1.gene;LITCHI023597.m1.gene;LITCHI025659.m1.gene;LITCHI026429.m1.gene;LITCHI028926.m3.gene;LITCHI029140.m1.gene;LITCHI029214.m1.gene
ko00460	Cyanoamino acid metabolism	0.0104	0.0125	0.83	0.884372	0.894322	LITCHI000391.m1.gene;LITCHI001688.m1.gene;LITCHI003696.m1.gene;LITCHI003697.m1.gene;LITCHI003698.m1.gene;LITCHI003701.m1.gene;LITCHI003703.m1.gene;LITCHI003705.m1.gene;LITCHI003707.m1.gene;LITCHI003711.m1.gene;LITCHI006763.m1.gene;LITCHI006766.m1.gene;LITCHI007175.m2.gene;LITCHI007304.m1.gene;LITCHI007743.m2.gene;LITCHI010919.m1.gene;LITCHI013460.m1.gene;LITCHI023108.m1.gene;LITCHI023318.m1.gene;…
ko00790	Folate biosynthesis	0.0031	0.0042	0.73	0.885884	0.894322	LITCHI007263.m1.gene;LITCHI009650.m1.gene;LITCHI012796.m1.gene;LITCHI013062.m2.gene;LITCHI020275.m1.gene;LITCHI023852.m1.gene;LITCHI024828.m1.gene;LITCHI027636.m1.gene
ko00943	Isoflavonoid biosynthesis	0.0031	0.0042	0.73	0.885884	0.894322	LITCHI006961.m1.gene;LITCHI009755.m1.gene;LITCHI010871.m1.gene;LITCHI010876.m1.gene;LITCHI010883.m1.gene;LITCHI015421.m1.gene;LITCHI019347.m1.gene;LITCHI025548.m1.gene
ko00965	Betalain biosynthesis	0.0027	0.0038	0.71	0.890843	0.894322	LITCHI000999.m1.gene;LITCHI005175.m1.gene;LITCHI010282.m1.gene;LITCHI010619.m1.gene;LITCHI011652.m1.gene;LITCHI019540.m1.gene;LITCHI025940.m1.gene
ko00910	Nitrogen metabolism	0.005	0.0066	0.76	0.895888	0.894322	LITCHI002968.m1.gene;LITCHI003343.m6.gene;LITCHI004417.m2.gene;LITCHI004907.m1.gene;LITCHI004943.m2.gene;LITCHI008105.m1.gene;LITCHI010646.m1.gene;LITCHI011161.m1.gene;LITCHI020534.m1.gene;LITCHI020534.m3.gene;LITCHI024622.m1.gene;LITCHI026406.m1.gene;Litchi_chinensis_newGene_7226
ko04070	Phosphatidylinositol signaling system	0.0112	0.0135	0.83	0.900947	0.894322	LITCHI000264.m1.gene;LITCHI000332.m1.gene;LITCHI000333.m1.gene;LITCHI000993.m1.gene;LITCHI002035.m1.gene;LITCHI002633.m1.gene;LITCHI003930.m1.gene;LITCHI004928.m1.gene;LITCHI005189.m1.gene;LITCHI006111.m1.gene;LITCHI007463.m1.gene;LITCHI007489.m1.gene;LITCHI009208.m1.gene;LITCHI010753.m1.gene;LITCHI011169.m1.gene;LITCHI011588.m1.gene;LITCHI013258.m1.gene;LITCHI018683.m10.gene;LITCHI018683.m5.gene…
ko00970	Aminoacyl-tRNA biosynthesis	0.0116	0.014	0.83	0.901433	0.894322	LITCHI000759.m1.gene;LITCHI001814.m1.gene;LITCHI004056.m1.gene;LITCHI004990.m1.gene;LITCHI005563.m1.gene;LITCHI005567.m1.gene;LITCHI007376.m1.gene;LITCHI008165.m1.gene;LITCHI009664.m1.gene;LITCHI011849.m1.gene;LITCHI013675.m1.gene;LITCHI014507.m1.gene;LITCHI015014.m1.gene;LITCHI015840.m1.gene;LITCHI016432.m1.gene;LITCHI017813.m1.gene;LITCHI020222.m1.gene;LITCHI020404.m1.gene;LITCHI020416.m2.gene;…
ko00450	Selenocompound metabolism	0.0035	0.0049	0.71	0.91683	0.894322	LITCHI003473.m1.gene;LITCHI003478.m1.gene;LITCHI003484.m1.gene;LITCHI003487.m1.gene;LITCHI006483.m1.gene;LITCHI015014.m1.gene;LITCHI015664.m1.gene;LITCHI019502.m1.gene;LITCHI027755.m1.gene
ko03013	RNA transport	0.0274	0.0316	0.87	0.927785	0.894322	LITCHI001460.m1.gene;LITCHI002508.m1.gene;LITCHI003408.m5.gene;LITCHI003758.m1.gene;LITCHI003761.m1.gene;LITCHI003768.m1.gene;LITCHI003774.m1.gene;LITCHI004208.m1.gene;LITCHI004391.m1.gene;LITCHI004684.m1.gene;LITCHI004685.m1.gene;LITCHI004806.m1.gene;LITCHI006113.m1.gene;LITCHI006155.m1.gene;LITCHI006757.m1.gene;LITCHI006916.m1.gene;LITCHI007340.m1.gene;LITCHI008149.m1.gene;LITCHI008768.m1.gene;…
ko00901	Indole alkaloid biosynthesis	0.0004	0.0009	0.41	0.93831	0.894322	LITCHI005416.m1.gene
ko00565	Ether lipid metabolism	0.0039	0.0056	0.69	0.939016	0.894322	LITCHI000834.m1.gene;LITCHI003114.m1.gene;LITCHI004213.m1.gene;LITCHI006390.m1.gene;LITCHI008706.m1.gene;LITCHI016870.m1.gene;LITCHI022938.m1.gene;LITCHI022958.m1.gene;LITCHI025583.m1.gene;LITCHI030857.m1.gene
ko03420	Nucleotide excision repair	0.0069	0.0093	0.75	0.942717	0.894322	LITCHI003319.m1.gene;LITCHI003916.m1.gene;LITCHI010111.m1.gene;LITCHI011270.m1.gene;LITCHI011282.m1.gene;LITCHI017195.m1.gene;LITCHI021243.m1.gene;LITCHI022050.m1.gene;LITCHI022539.m1.gene;LITCHI023474.m1.gene;LITCHI023597.m1.gene;LITCHI024736.m1.gene;LITCHI025659.m1.gene;LITCHI026012.m1.gene;LITCHI026256.m1.gene;LITCHI028798.m1.gene;LITCHI029140.m1.gene;LITCHI031731.m1.gene
ko00904	Diterpenoid biosynthesis	0.0039	0.0057	0.68	0.945974	0.894322	LITCHI007505.m1.gene;LITCHI009240.m1.gene;LITCHI009739.m2.gene;LITCHI014295.m1.gene;LITCHI016694.m1.gene;LITCHI018925.m1.gene;LITCHI022103.m1.gene;LITCHI022216.m1.gene;LITCHI025158.m3.gene;LITCHI025278.m1.gene
ko00860	Porphyrin and chlorophyll metabolism	0.0073	0.0098	0.75	0.946969	0.894322	LITCHI005723.m2.gene;LITCHI011077.m3.gene;LITCHI012960.m1.gene;LITCHI013195.m1.gene;LITCHI015167.m1.gene;LITCHI016758.m1.gene;LITCHI021077.m1.gene;LITCHI022931.m1.gene;LITCHI022952.m1.gene;LITCHI023634.m1.gene;LITCHI024287.m1.gene;LITCHI024292.m1.gene;LITCHI024293.m1.gene;LITCHI024575.m1.gene;LITCHI025255.m1.gene;LITCHI026173.m1.gene;LITCHI026697.m1.gene;LITCHI027466.m1.gene;LITCHI029087.m1.gene
ko00072	Synthesis and degradation of ketone bodies	0.0004	0.001	0.37	0.952119	0.894322	LITCHI022941.m1.gene
ko00591	Linoleic acid metabolism	0.0015	0.0029	0.53	0.963534	0.894322	LITCHI004046.m1.gene;LITCHI004067.m1.gene;LITCHI008706.m1.gene;LITCHI024090.m1.gene
ko03030	DNA replication	0.005	0.0075	0.67	0.968692	0.894322	LITCHI003319.m1.gene;LITCHI006901.m1.gene;LITCHI010111.m1.gene;LITCHI011270.m1.gene;LITCHI011282.m1.gene;LITCHI019064.m1.gene;LITCHI021243.m1.gene;LITCHI021949.m1.gene;LITCHI022539.m1.gene;LITCHI023474.m1.gene;LITCHI023597.m1.gene;LITCHI025659.m1.gene;LITCHI029140.m1.gene
ko00945	Stilbenoid, diarylheptanoid and gingerol biosynthesis	0.0035	0.0056	0.62	0.970062	0.894322	LITCHI002336.m1.gene;LITCHI004757.m1.gene;LITCHI005868.m1.gene;LITCHI006077.m1.gene;LITCHI012734.m1.gene;LITCHI017673.m1.gene;LITCHI021287.m1.gene;LITCHI021290.m1.gene;LITCHI030655.m1.gene
ko00940	Phenylpropanoid biosynthesis	0.0289	0.0348	0.83	0.973251	0.894322	LITCHI001530.m1.gene;LITCHI001573.m1.gene;LITCHI002330.m1.gene;LITCHI002336.m1.gene;LITCHI004425.m1.gene;LITCHI004433.m1.gene;LITCHI004757.m1.gene;LITCHI005378.m1.gene;LITCHI005521.m1.gene;LITCHI005551.m1.gene;LITCHI005868.m1.gene;LITCHI006523.m1.gene;LITCHI006553.m1.gene;LITCHI006684.m1.gene;LITCHI006810.m1.gene;LITCHI007023.m1.gene;LITCHI007304.m1.gene;LITCHI007653.m1.gene;LITCHI007653.m5.gene;…
ko04016	MAPK signaling pathway - plant	0.0424	0.05	0.85	0.980947	0.894322	LITCHI000318.m1.gene;LITCHI000426.m1.gene;LITCHI001141.m1.gene;LITCHI001308.m1.gene;LITCHI001381.m1.gene;LITCHI001383.m1.gene;LITCHI001687.m1.gene;LITCHI001941.m1.gene;LITCHI002110.m1.gene;LITCHI002114.m1.gene;LITCHI002117.m1.gene;LITCHI002689.m1.gene;LITCHI002883.m1.gene;LITCHI003581.m1.gene;LITCHI003694.m1.gene;LITCHI005189.m1.gene;LITCHI005774.m1.gene;LITCHI005919.m1.gene;LITCHI006364.m1.gene;…
ko04130	SNARE interactions in vesicular transport	0.0027	0.0049	0.55	0.982536	0.894322	LITCHI003675.m1.gene;LITCHI008457.m1.gene;LITCHI009336.m1.gene;LITCHI016204.m1.gene;LITCHI019493.m1.gene;LITCHI020079.m1.gene;LITCHI029925.m1.gene
ko03022	Basal transcription factors	0.005	0.0079	0.63	0.982947	0.894322	LITCHI005862.m1.gene;LITCHI007781.m1.gene;LITCHI017195.m1.gene;LITCHI017295.m1.gene;LITCHI018626.m1.gene;LITCHI022050.m1.gene;LITCHI022240.m1.gene;LITCHI023900.m1.gene;LITCHI023900.m2.gene;LITCHI024736.m1.gene;LITCHI026256.m1.gene;LITCHI029335.m1.gene;LITCHI030246.m1.gene
ko00040	Pentose and glucuronate interconversions	0.0193	0.0256	0.75	0.992928	0.894322	LITCHI000564.m1.gene;LITCHI001895.m1.gene;LITCHI003518.m1.gene;LITCHI003549.m1.gene;LITCHI004225.m1.gene;LITCHI004925.m1.gene;LITCHI005148.m4.gene;LITCHI005828.m1.gene;LITCHI007166.m1.gene;LITCHI007542.m1.gene;LITCHI008049.m1.gene;LITCHI008052.m1.gene;LITCHI008940.m1.gene;LITCHI009125.m1.gene;LITCHI009126.m1.gene;LITCHI009264.m1.gene;LITCHI009266.m1.gene;LITCHI010761.m1.gene;LITCHI012494.m1.gene;…
ko00909	Sesquiterpenoid and triterpenoid biosynthesis	0.0073	0.0124	0.59	0.998205	0.894322	LITCHI001907.m1.gene;LITCHI016236.m1.gene;LITCHI016511.m1.gene;LITCHI021182.m1.gene;LITCHI022586.m1.gene;LITCHI023890.m1.gene;LITCHI028398.m1.gene;LITCHI029158.m1.gene;LITCHI029159.m1.gene;LITCHI029161.m1.gene;LITCHI029162.m1.gene;LITCHI029350.m1.gene;LITCHI029355.m1.gene;LITCHI031186.m1.gene;LITCHI031448.m1.gene;LITCHI031663.m1.gene;Litchi_chinensis_newGene_1179;Litchi_chinensis_newGene_4436;Lit…
ko00941	Flavonoid biosynthesis	0.0073	0.0126	0.58	0.998613	0.894322	LITCHI001456.m3.gene;LITCHI001957.m1.gene;LITCHI002308.m1.gene;LITCHI002336.m1.gene;LITCHI004757.m1.gene;LITCHI005474.m1.gene;LITCHI005868.m1.gene;LITCHI007338.m2.gene;LITCHI012734.m1.gene;LITCHI017673.m1.gene;LITCHI021287.m1.gene;LITCHI021290.m1.gene;LITCHI024776.m1.gene;LITCHI026907.m1.gene;LITCHI026910.m1.gene;LITCHI026912.m1.gene;LITCHI027152.m1.gene;LITCHI027959.m1.gene;LITCHI030655.m1.gene
ko04626	Plant-pathogen interaction	0.0903	0.1084	0.83	0.999727	0.894322	LITCHI000055.m1.gene;LITCHI000059.m1.gene;LITCHI000318.m1.gene;LITCHI000691.m1.gene;LITCHI000694.m1.gene;LITCHI001136.m1.gene;LITCHI001308.m1.gene;LITCHI001381.m1.gene;LITCHI001383.m1.gene;LITCHI001829.m1.gene;LITCHI002030.m1.gene;LITCHI002078.m1.gene;LITCHI002145.m1.gene;LITCHI002195.m1.gene;LITCHI002566.m1.gene;LITCHI002754.m1.gene;LITCHI002762.m1.gene;LITCHI002816.m1.gene;LITCHI002883.m1.gene;…
ko03440	Homologous recombination	0.005	0.0118	0.42	0.999979	0.894322	LITCHI001875.m1.gene;LITCHI005766.m1.gene;LITCHI010109.m1.gene;LITCHI010111.m1.gene;LITCHI010117.m1.gene;LITCHI011888.m1.gene;LITCHI014992.m1.gene;LITCHI017418.m1.gene;LITCHI021243.m1.gene;LITCHI025988.m1.gene;LITCHI027407.m1.gene;LITCHI029140.m1.gene;LITCHI030802.m1.gene

## Sheet: DEcircRNAs in fruits
KEGG pathway assignments for DEcircRNAs in fruits
ID	Description	GeneRatio	BgRatio	enrich_factor	pvalue	qvalue	geneID
ko00480	Glutathione metabolism	0.25	0.003	82.5	0.0120845	0.025441	LITCHI018518.m1.gene
ko00280	Valine, leucine and isoleucine degradation	0.25	0.0071	35.36	0.0280263	0.0295014	LITCHI007835.m1.gene
ko04146	Peroxisome	0.25	0.0212	11.79	0.0823076	0.0453136	LITCHI008367.m3.gene
ko00940	Phenylpropanoid biosynthesis	0.25	0.0222	11.25	0.0860958	0.0453136	LITCHI011513.m1.gene

## Sheet: DEcircRNAs in leaves
KEGG pathway assignments for DEcircRNAs in leaves
ID	Description	GeneRatio	BgRatio	enrich_factor	pvalue	qvalue	geneID
ko00514	Other types of O-glycan biosynthesis	1	0.003	330	0.0030303	NA	LITCHI020832.m1.gene

## Sheet: DEmiRNAs in fruits
KEGG pathway assignments for DEmiRNAs in fruits
ID	Description	GeneRatio	BgRatio	enrich_factor	pvalue	qvalue	geneID
ko04075	Plant hormone signal transduction	0.1435	0.0624	2.3	1.55026e-05	0.00141971	LITCHI001025.m1.gene;LITCHI001557.m1.gene;LITCHI004632.m1.gene;LITCHI006672.m1.gene;LITCHI007611.m1.gene;LITCHI007943.m1.gene;LITCHI009943.m1.gene;LITCHI010905.m1.gene;LITCHI010975.m1.gene;LITCHI013492.m1.gene;LITCHI015054.m1.gene;LITCHI015059.m1.gene;LITCHI015062.m1.gene;LITCHI016198.m1.gene;LITCHI017923.m1.gene;LITCHI017924.m1.gene;LITCHI017925.m1.gene;LITCHI018152.m1.gene;LITCHI020811.m1.gene;…
ko04626	Plant-pathogen interaction	0.1675	0.1026	1.63	0.0024283	0.089	LITCHI004018.m1.gene;LITCHI004079.m1.gene;LITCHI009842.m1.gene;LITCHI011784.m1.gene;LITCHI012885.m1.gene;LITCHI013359.m1.gene;LITCHI013493.m1.gene;LITCHI015062.m1.gene;LITCHI015064.m1.gene;LITCHI017925.m1.gene;LITCHI021499.m1.gene;LITCHI021682.m1.gene;LITCHI022857.m1.gene;LITCHI023743.m1.gene;LITCHI023743.m10.gene;LITCHI023743.m4.gene;LITCHI024653.m1.gene;LITCHI024655.m1.gene;LITCHI025844.m1.gene…
ko00196	Photosynthesis - antenna proteins	0.0144	0.0014	10.15	0.00291552	0.089	LITCHI009853.m1.gene;LITCHI011004.m1.gene;LITCHI011004.m2.gene
ko03015	mRNA surveillance pathway	0.0383	0.0155	2.47	0.0159709	0.365649	LITCHI000435.m1.gene;LITCHI000435.m4.gene;LITCHI004806.m1.gene;LITCHI005501.m1.gene;LITCHI018731.m1.gene;LITCHI021753.m1.gene;LITCHI021757.m1.gene;LITCHI026005.m1.gene
ko00520	Amino sugar and nucleotide sugar metabolism	0.0526	0.0275	1.91	0.0296783	0.543581	LITCHI002954.m1.gene;LITCHI010258.m1.gene;LITCHI013233.m1.gene;LITCHI016172.m1.gene;LITCHI016250.m1.gene;LITCHI019882.m1.gene;LITCHI024858.m1.gene;LITCHI027645.m5.gene;LITCHI027754.m1.gene;LITCHI027754.m4.gene;LITCHI028734.m1.gene
ko00860	Porphyrin and chlorophyll metabolism	0.0239	0.0101	2.37	0.0600508	0.76929	LITCHI008866.m1.gene;LITCHI008874.m1.gene;LITCHI019172.m1.gene;LITCHI019175.m1.gene;LITCHI023857.m1.gene
ko00400	Phenylalanine, tyrosine and tryptophan biosynthesis	0.0191	0.0076	2.52	0.0747732	0.76929	LITCHI002682.m1.gene;LITCHI003805.m1.gene;LITCHI014935.m1.gene;LITCHI020904.m1.gene
ko00240	Pyrimidine metabolism	0.0239	0.0109	2.2	0.077663	0.76929	LITCHI007559.m1.gene;LITCHI014785.m1.gene;LITCHI014785.m2.gene;LITCHI014785.m3.gene;LITCHI029131.m2.gene
ko00760	Nicotinate and nicotinamide metabolism	0.0144	0.0049	2.95	0.0811363	0.76929	LITCHI014785.m1.gene;LITCHI014785.m2.gene;LITCHI014785.m3.gene
ko04136	Autophagy - other	0.0144	0.005	2.9	0.0846145	0.76929	LITCHI001630.m1.gene;LITCHI001636.m1.gene;LITCHI008960.m1.gene
ko00500	Starch and sucrose metabolism	0.0622	0.0413	1.51	0.0924032	0.76929	LITCHI005064.m1.gene;LITCHI005830.m1.gene;LITCHI009111.m1.gene;LITCHI009111.m3.gene;LITCHI010258.m1.gene;LITCHI011397.m1.gene;LITCHI011827.m1.gene;LITCHI011899.m1.gene;LITCHI011899.m2.gene;LITCHI017302.m1.gene;LITCHI019882.m1.gene;LITCHI026966.m1.gene;LITCHI028734.m1.gene
ko00740	Riboflavin metabolism	0.0096	0.0033	2.93	0.148921	0.980198	LITCHI007263.m1.gene;LITCHI022549.m1.gene
ko03018	RNA degradation	0.0335	0.021	1.6	0.149781	0.980198	LITCHI005404.m1.gene;LITCHI005404.m10.gene;LITCHI005404.m2.gene;LITCHI005404.m5.gene;LITCHI015914.m1.gene;LITCHI020794.m1.gene;LITCHI023264.m1.gene
ko00072	Synthesis and degradation of ketone bodies	0.0048	0.0011	4.51	0.200617	0.980198	LITCHI021501.m1.gene
ko00604	Glycosphingolipid biosynthesis - ganglio series	0.0096	0.0043	2.21	0.229067	0.980198	LITCHI024725.m1.gene;LITCHI026392.m1.gene
ko00650	Butanoate metabolism	0.0096	0.0046	2.08	0.249641	0.980198	LITCHI021501.m1.gene;LITCHI023839.m1.gene
ko01230	Biosynthesis of amino acids	0.0526	0.0416	1.26	0.254776	0.980198	LITCHI002682.m1.gene;LITCHI003379.m1.gene;LITCHI003805.m1.gene;LITCHI008692.m1.gene;LITCHI014935.m1.gene;LITCHI017508.m2.gene;LITCHI018601.m1.gene;LITCHI019652.m1.gene;LITCHI020904.m1.gene;LITCHI023264.m1.gene;LITCHI029048.m1.gene
ko04130	SNARE interactions in vesicular transport	0.0096	0.005	1.93	0.277144	0.980198	LITCHI024425.m1.gene;LITCHI024425.m3.gene
ko00450	Selenocompound metabolism	0.0096	0.005	1.9	0.284017	0.980198	LITCHI003379.m1.gene;LITCHI008692.m1.gene
ko00270	Cysteine and methionine metabolism	0.0239	0.0172	1.39	0.28915	0.980198	LITCHI003379.m1.gene;LITCHI008692.m1.gene;LITCHI017508.m2.gene;LITCHI018542.m1.gene;LITCHI020904.m1.gene
ko04120	Ubiquitin mediated proteolysis	0.0287	0.0226	1.27	0.335791	0.980198	LITCHI003794.m1.gene;LITCHI010236.m1.gene;LITCHI018349.m1.gene;LITCHI021043.m1.gene;LITCHI022026.m1.gene;LITCHI029196.m1.gene
ko00513	Various types of N-glycan biosynthesis	0.0096	0.0058	1.64	0.345362	0.980198	LITCHI001628.m1.gene;LITCHI031451.m1.gene
ko00052	Galactose metabolism	0.0239	0.0188	1.27	0.358323	0.980198	LITCHI009111.m1.gene;LITCHI009111.m3.gene;LITCHI024725.m1.gene;LITCHI026392.m1.gene;LITCHI026584.m1.gene
ko00531	Glycosaminoglycan degradation	0.0096	0.0061	1.57	0.365469	0.980198	LITCHI024725.m1.gene;LITCHI026392.m1.gene
ko00600	Sphingolipid metabolism	0.0144	0.0105	1.36	0.377722	0.980198	LITCHI001613.m1.gene;LITCHI024725.m1.gene;LITCHI026392.m1.gene
ko00511	Other glycan degradation	0.0144	0.0107	1.34	0.387763	0.980198	LITCHI014322.m1.gene;LITCHI024725.m1.gene;LITCHI026392.m1.gene
ko00640	Propanoate metabolism	0.0096	0.0065	1.48	0.391902	0.980198	LITCHI020974.m1.gene;LITCHI021501.m1.gene
ko00770	Pantothenate and CoA biosynthesis	0.0096	0.0067	1.42	0.4114	0.980198	LITCHI008116.m1.gene;LITCHI029048.m1.gene
ko00260	Glycine, serine and threonine metabolism	0.0144	0.0111	1.29	0.412686	0.980198	LITCHI005185.m1.gene;LITCHI014935.m1.gene;LITCHI019652.m1.gene
ko04016	MAPK signaling pathway - plant	0.0526	0.0488	1.08	0.442703	0.980198	LITCHI010169.m1.gene;LITCHI012885.m1.gene;LITCHI015062.m1.gene;LITCHI017397.m1.gene;LITCHI017398.m1.gene;LITCHI017925.m1.gene;LITCHI017931.m1.gene;LITCHI021682.m1.gene;LITCHI022857.m1.gene;LITCHI025844.m1.gene;LITCHI025850.m1.gene
ko00410	beta-Alanine metabolism	0.0096	0.0072	1.34	0.443197	0.980198	LITCHI008116.m1.gene;LITCHI020974.m1.gene
ko03440	Homologous recombination	0.0144	0.0118	1.22	0.447024	0.980198	LITCHI005765.m1.gene;LITCHI005766.m1.gene;LITCHI014701.m1.gene
ko01040	Biosynthesis of unsaturated fatty acids	0.0048	0.0028	1.69	0.449892	0.980198	LITCHI020974.m1.gene
ko01212	Fatty acid metabolism	0.0144	0.0119	1.2	0.456692	0.980198	LITCHI020974.m1.gene;LITCHI021501.m1.gene;LITCHI024780.m1.gene
ko00230	Purine metabolism	0.0191	0.0167	1.15	0.463557	0.980198	LITCHI014785.m1.gene;LITCHI014785.m2.gene;LITCHI014785.m3.gene;LITCHI029131.m2.gene
ko00905	Brassinosteroid biosynthesis	0.0048	0.0033	1.46	0.499014	0.980198	LITCHI009147.m1.gene
ko03008	Ribosome biogenesis in eukaryotes	0.0191	0.0177	1.08	0.50754	0.980198	LITCHI007033.m1.gene;LITCHI011979.m1.gene;LITCHI016520.m1.gene;LITCHI030799.m1.gene
ko00710	Carbon fixation in photosynthetic organisms	0.0096	0.0081	1.18	0.509636	0.980198	LITCHI020876.m1.gene;LITCHI020904.m1.gene
ko03022	Basal transcription factors	0.0096	0.0081	1.18	0.509636	0.980198	LITCHI002408.m1.gene;LITCHI002443.m1.gene
ko03040	Spliceosome	0.0335	0.0324	1.03	0.520283	0.980198	LITCHI004486.m1.gene;LITCHI004529.m1.gene;LITCHI004530.m1.gene;LITCHI007329.m1.gene;LITCHI022562.m1.gene;LITCHI028873.m1.gene;LITCHI029224.m1.gene
ko00900	Terpenoid backbone biosynthesis	0.0096	0.0084	1.14	0.526843	0.980198	LITCHI021501.m1.gene;LITCHI023857.m1.gene
ko01210	2-Oxocarboxylic acid metabolism	0.0144	0.0133	1.08	0.531201	0.980198	LITCHI018601.m1.gene;LITCHI020904.m1.gene;LITCHI029048.m1.gene
ko00330	Arginine and proline metabolism	0.0096	0.0085	1.13	0.532488	0.980198	LITCHI008116.m1.gene;LITCHI020904.m1.gene
ko04070	Phosphatidylinositol signaling system	0.0144	0.0138	1.04	0.553303	0.980198	LITCHI001402.m1.gene;LITCHI005956.m1.gene;LITCHI013381.m1.gene
ko00071	Fatty acid degradation	0.0096	0.0089	1.07	0.560021	0.980198	LITCHI020974.m1.gene;LITCHI021501.m1.gene
ko00360	Phenylalanine metabolism	0.0096	0.009	1.06	0.565387	0.980198	LITCHI018100.m1.gene;LITCHI020904.m1.gene
ko00290	Valine, leucine and isoleucine biosynthesis	0.0048	0.0042	1.15	0.584542	0.980198	LITCHI029048.m1.gene
ko00350	Tyrosine metabolism	0.0096	0.0095	1.01	0.591515	0.980198	LITCHI018100.m1.gene;LITCHI020904.m1.gene
ko00563	Glycosylphosphatidylinositol (GPI)-anchor biosynthesis	0.0048	0.0043	1.1	0.599817	0.980198	LITCHI003598.m1.gene
ko00790	Folate biosynthesis	0.0048	0.0043	1.1	0.599817	0.980198	LITCHI007263.m1.gene
ko00062	Fatty acid elongation	0.0048	0.0046	1.04	0.621688	0.980198	LITCHI024780.m1.gene
ko00562	Inositol phosphate metabolism	0.0144	0.0156	0.92	0.63524	0.980198	LITCHI001402.m1.gene;LITCHI005956.m1.gene;LITCHI013381.m1.gene
ko00380	Tryptophan metabolism	0.0096	0.0103	0.93	0.640227	0.980198	LITCHI021501.m1.gene;LITCHI025923.m1.gene
ko00220	Arginine biosynthesis	0.0048	0.005	0.95	0.655527	0.980198	LITCHI020904.m1.gene
ko03020	RNA polymerase	0.0048	0.0052	0.92	0.668203	0.980198	LITCHI018969.m1.gene
ko00195	Photosynthesis	0.0048	0.0053	0.9	0.674366	0.980198	LITCHI008152.m1.gene
ko00960	Tropane, piperidine and pyridine alkaloid biosynthesis	0.0048	0.0056	0.86	0.69218	0.980198	LITCHI020904.m1.gene
ko00565	Ether lipid metabolism	0.0048	0.0057	0.83	0.703513	0.980198	LITCHI007845.m1.gene
ko04145	Phagosome	0.0096	0.0118	0.81	0.708533	0.980198	LITCHI007727.m1.gene;LITCHI010095.m1.gene
ko00564	Glycerophospholipid metabolism	0.0144	0.0176	0.82	0.715866	0.980198	LITCHI004455.m1.gene;LITCHI007845.m1.gene;LITCHI013325.m1.gene
ko00920	Sulfur metabolism	0.0048	0.006	0.8	0.71974	0.980198	LITCHI029620.m1.gene
ko00950	Isoquinoline alkaloid biosynthesis	0.0048	0.0065	0.73	0.749588	0.980198	LITCHI020904.m1.gene
ko00250	Alanine, aspartate and glutamate metabolism	0.0048	0.007	0.69	0.772029	0.980198	LITCHI020904.m1.gene
ko00310	Lysine degradation	0.0048	0.0072	0.67	0.780434	0.980198	LITCHI021501.m1.gene
ko00040	Pentose and glucuronate interconversions	0.0191	0.0258	0.74	0.792514	0.980198	LITCHI004398.m1.gene;LITCHI012494.m1.gene;LITCHI026692.m1.gene;LITCHI027024.m1.gene
ko00592	alpha-Linolenic acid metabolism	0.0048	0.0075	0.64	0.796331	0.980198	LITCHI020974.m1.gene
ko00970	Aminoacyl-tRNA biosynthesis	0.0096	0.0141	0.68	0.799168	0.980198	LITCHI022859.m10.gene;LITCHI028430.m1.gene
ko00073	Cutin, suberine and wax biosynthesis	0.0048	0.008	0.59	0.818053	0.980198	LITCHI016914.m1.gene
ko00051	Fructose and mannose metabolism	0.0096	0.015	0.64	0.825853	0.980198	LITCHI027645.m5.gene;LITCHI029662.m1.gene
ko00510	N-Glycan biosynthesis	0.0048	0.0083	0.58	0.828034	0.980198	LITCHI031451.m1.gene
ko00061	Fatty acid biosynthesis	0.0048	0.0087	0.55	0.840498	0.980198	LITCHI024780.m1.gene
ko01200	Carbon metabolism	0.0335	0.0454	0.74	0.843499	0.980198	LITCHI018601.m1.gene;LITCHI019652.m1.gene;LITCHI020876.m1.gene;LITCHI020904.m1.gene;LITCHI020974.m1.gene;LITCHI021501.m1.gene;LITCHI023264.m1.gene
ko00908	Zeatin biosynthesis	0.0048	0.0089	0.54	0.849253	0.980198	LITCHI019391.m1.gene
ko00130	Ubiquinone and other terpenoid-quinone biosynthesis	0.0048	0.0094	0.51	0.862793	0.980198	LITCHI005400.m1.gene
ko00280	Valine, leucine and isoleucine degradation	0.0048	0.0094	0.51	0.862793	0.980198	LITCHI021501.m1.gene
ko00906	Carotenoid biosynthesis	0.0048	0.0094	0.51	0.862793	0.980198	LITCHI019197.m1.gene
ko04144	Endocytosis	0.0191	0.0296	0.65	0.871193	0.980198	LITCHI007329.m1.gene;LITCHI007727.m1.gene;LITCHI013381.m1.gene;LITCHI022883.m1.gene
ko00630	Glyoxylate and dicarboxylate metabolism	0.0096	0.0176	0.54	0.886168	0.980198	LITCHI003442.m1.gene;LITCHI021501.m1.gene
ko00020	Citrate cycle (TCA cycle)	0.0048	0.0105	0.45	0.892597	0.980198	LITCHI018601.m1.gene
ko00909	Sesquiterpenoid and triterpenoid biosynthesis	0.0048	0.011	0.44	0.90226	0.980198	LITCHI031180.m1.gene
ko03013	RNA transport	0.0191	0.0319	0.6	0.905144	0.980198	LITCHI004806.m1.gene;LITCHI012173.m1.gene;LITCHI018142.m1.gene;LITCHI018731.m1.gene
ko03010	Ribosome	0.0191	0.0326	0.59	0.913875	0.980198	LITCHI001450.m1.gene;LITCHI011167.m1.gene;LITCHI018123.m1.gene;LITCHI018123.m2.gene
ko04141	Protein processing in endoplasmic reticulum	0.0239	0.0391	0.61	0.915839	0.980198	LITCHI007329.m1.gene;LITCHI009935.m1.gene;LITCHI014436.m1.gene;LITCHI015474.m1.gene;LITCHI031451.m1.gene
ko04712	Circadian rhythm - plant	0.0048	0.0117	0.41	0.915951	0.980198	LITCHI007033.m1.gene
ko00010	Glycolysis / Gluconeogenesis	0.0144	0.0271	0.53	0.925331	0.980198	LITCHI019652.m1.gene;LITCHI023264.m1.gene;LITCHI029662.m1.gene
ko00941	Flavonoid biosynthesis	0.0048	0.0129	0.37	0.935477	0.980198	LITCHI010261.m1.gene
ko02010	ABC transporters	0.0048	0.0133	0.36	0.940175	0.980198	LITCHI014263.m1.gene
ko00620	Pyruvate metabolism	0.0048	0.0134	0.36	0.942395	0.980198	LITCHI021501.m1.gene
ko00030	Pentose phosphate pathway	0.0048	0.0149	0.32	0.957441	0.980198	LITCHI029662.m1.gene
ko04146	Peroxisome	0.0048	0.0171	0.28	0.973503	0.980198	LITCHI020974.m1.gene
ko00561	Glycerolipid metabolism	0.0048	0.0172	0.28	0.974001	0.980198	LITCHI013325.m1.gene
ko00940	Phenylpropanoid biosynthesis	0.0096	0.0351	0.27	0.995342	0.990787	LITCHI007023.m1.gene;LITCHI027458.m1.gene

## Sheet: DEmiRNAs in leaves
KEGG pathway assignments for DEmiRNAs in leaves
ID	Description	GeneRatio	BgRatio	enrich_factor	pvalue	qvalue	geneID
ko04130	SNARE interactions in vesicular transport	0.0444	0.0039	11.48	0.000206356	0.00868865	LITCHI010612.m1.gene;LITCHI024425.m1.gene;LITCHI024425.m3.gene;LITCHI027773.m1.gene
ko00513	Various types of N-glycan biosynthesis	0.0333	0.0044	7.65	0.00554974	0.0778912	LITCHI012380.m1.gene;LITCHI012898.m1.gene;LITCHI012898.m2.gene
ko03020	RNA polymerase	0.0333	0.0044	7.65	0.00554974	0.0778912	LITCHI014387.m1.gene;LITCHI019913.m1.gene;LITCHI030454.m1.gene
ko00196	Photosynthesis - antenna proteins	0.0222	0.0024	9.18	0.0172242	0.181307	LITCHI011004.m1.gene;LITCHI011004.m2.gene
ko00360	Phenylalanine metabolism	0.0111	0.0005	22.96	0.0435624	0.366842	LITCHI018100.m1.gene
ko00260	Glycine, serine and threonine metabolism	0.0111	0.001	11.48	0.0852474	0.512766	LITCHI022943.m1.gene
ko00740	Riboflavin metabolism	0.0111	0.001	11.48	0.0852474	0.512766	LITCHI022549.m1.gene
ko00520	Amino sugar and nucleotide sugar metabolism	0.0444	0.0208	2.14	0.114387	0.554723	LITCHI002454.m1.gene;LITCHI024858.m1.gene;LITCHI027754.m1.gene;LITCHI027754.m4.gene
ko04122	Sulfur relay system	0.0111	0.0015	7.65	0.125135	0.554723	LITCHI026873.m1.gene
ko00592	alpha-Linolenic acid metabolism	0.0222	0.0073	3.06	0.136563	0.554723	LITCHI004723.m1.gene;LITCHI004723.m6.gene
ko00010	Glycolysis / Gluconeogenesis	0.0111	0.0019	5.74	0.163302	0.554723	Litchi_chinensis_newGene_4718
ko03030	DNA replication	0.0111	0.0019	5.74	0.163302	0.554723	LITCHI004741.m1.gene
ko00040	Pentose and glucuronate interconversions	0.0333	0.016	2.09	0.171271	0.554723	LITCHI025761.m1.gene;LITCHI026604.m1.gene;LITCHI026619.m1.gene
ko00190	Oxidative phosphorylation	0.0222	0.0092	2.42	0.199345	0.560901	LITCHI027144.m1.gene;LITCHI027144.m2.gene
ko00905	Brassinosteroid biosynthesis	0.0111	0.0024	4.59	0.199821	0.560901	LITCHI027046.m1.gene
ko00970	Aminoacyl-tRNA biosynthesis	0.0222	0.0097	2.3	0.215574	0.5673	LITCHI020222.m1.gene;LITCHI020222.m2.gene
ko00920	Sulfur metabolism	0.0111	0.0029	3.83	0.234763	0.581457	LITCHI014891.m1.gene
ko02010	ABC transporters	0.0222	0.0111	2	0.264817	0.610814	LITCHI014263.m1.gene;LITCHI028701.m1.gene
ko04146	Peroxisome	0.0333	0.0203	1.64	0.27563	0.610814	LITCHI004230.m1.gene;LITCHI020212.m1.gene;LITCHI020873.m1.gene
ko03410	Base excision repair	0.0111	0.0039	2.87	0.300183	0.623879	LITCHI006472.m1.gene
ko00600	Sphingolipid metabolism	0.0111	0.0044	2.55	0.330788	0.623879	LITCHI011796.m1.gene
ko00310	Lysine degradation	0.0111	0.0048	2.3	0.360068	0.623879	LITCHI006720.m1.gene
ko00511	Other glycan degradation	0.0111	0.0048	2.3	0.360068	0.623879	LITCHI014322.m1.gene
ko03013	RNA transport	0.0333	0.0237	1.41	0.360758	0.623879	LITCHI000176.m1.gene;LITCHI011448.m1.gene;LITCHI028043.m1.gene
ko00900	Terpenoid backbone biosynthesis	0.0111	0.0053	2.09	0.38808	0.623879	LITCHI016334.m1.gene
ko01230	Biosynthesis of amino acids	0.0444	0.0358	1.24	0.404552	0.623879	LITCHI015099.m1.gene;LITCHI015099.m4.gene;LITCHI028582.m1.gene;LITCHI029048.m1.gene
ko00051	Fructose and mannose metabolism	0.0111	0.0058	1.91	0.41488	0.623879	LITCHI003447.m1.gene
ko03430	Mismatch repair	0.0111	0.0058	1.91	0.41488	0.623879	LITCHI025271.m1.gene
ko03015	mRNA surveillance pathway	0.0222	0.0165	1.35	0.440691	0.639842	LITCHI026005.m1.gene;LITCHI027927.m1.gene
ko04144	Endocytosis	0.0333	0.0276	1.21	0.456213	0.640299	LITCHI017665.m1.gene;LITCHI018337.m1.gene;LITCHI020256.m1.gene
ko04136	Autophagy - other	0.0111	0.0073	1.53	0.488508	0.663508	LITCHI008960.m1.gene
ko04141	Protein processing in endoplasmic reticulum	0.0333	0.03	1.11	0.512926	0.674902	LITCHI014436.m1.gene;LITCHI028534.m1.gene;LITCHI029651.m1.gene
ko03018	RNA degradation	0.0222	0.0203	1.09	0.553774	0.706569	LITCHI003392.m1.gene;LITCHI005332.m1.gene
ko01212	Fatty acid metabolism	0.0111	0.0097	1.15	0.591397	0.7237	LITCHI024146.m1.gene
ko03050	Proteasome	0.0111	0.0102	1.09	0.609371	0.7237	LITCHI003830.m1.gene
ko04712	Circadian rhythm - plant	0.0111	0.0106	1.04	0.626562	0.7237	LITCHI026370.m1.gene
ko04626	Plant-pathogen interaction	0.1111	0.1191	0.93	0.644767	0.7237	LITCHI013982.m1.gene;LITCHI021499.m1.gene;LITCHI021682.m1.gene;LITCHI022857.m1.gene;LITCHI024053.m1.gene;LITCHI024053.m2.gene;LITCHI031722.m1.gene;Litchi_chinensis_newGene_3317;Litchi_chinensis_newGene_3335;Litchi_chinensis_newGene_5887
ko04145	Phagosome	0.0111	0.0121	0.92	0.673773	0.7237	LITCHI020333.m1.gene
ko00500	Starch and sucrose metabolism	0.0333	0.0382	0.87	0.679531	0.7237	LITCHI001804.m1.gene;LITCHI024445.m2.gene;LITCHI028800.m1.gene
ko04075	Plant hormone signal transduction	0.0556	0.0634	0.88	0.687515	0.7237	LITCHI004765.m1.gene;LITCHI009943.m1.gene;LITCHI016198.m1.gene;LITCHI022578.m1.gene;LITCHI031035.m1.gene
ko03440	Homologous recombination	0.0111	0.0145	0.77	0.739689	0.759629	LITCHI020238.m1.gene
ko03008	Ribosome biogenesis in eukaryotes	0.0111	0.0155	0.72	0.762199	0.76411	LITCHI030799.m1.gene
ko03010	Ribosome	0.0111	0.0242	0.46	0.895068	0.861007	LITCHI028762.m1.gene
ko01200	Carbon metabolism	0.0111	0.0247	0.45	0.899753	0.861007	Litchi_chinensis_newGene_8469
ko03040	Spliceosome	0.0111	0.0378	0.29	0.971046	0.908581	LITCHI004486.m1.gene
